# Supplementary material for: Electronic structure analysis and DFT benchmarking of Rydberg-type alkali-metal-crown ether, -cryptand, and -adamanzane complexes
Source: Royal Society of Chemistry journal article supplement (doi:10.1039/d4cp00723a), 2024-01-01
Supplement: d4cp00723a1.pdf [file d4cp00723a1.pdf]

# Electronic Structure Analysis and DFT Benchmarking of Rydberg-type Alkali-Metal-Crown Ether, -Cryptand, and -Adamanzane Complexes

Isuru R. Ariyaratna

## Electronic Supporting Information

*Physics and Chemistry of Materials (T-1), Los Alamos National Laboratory,  
Los Alamos, NM 87545, USA*

Email: [isuru@lanl.gov](mailto:isuru@lanl.gov)

Table S1. Optimized geometries of M(9-Crown-3) and [M(9-Crown-3)<sub>2</sub>]<sup>0/+</sup> (M = Li, Na) at CAM-B3LYP (Li/Na,C,O: cc-pVTZ and H: aug-cc-pVTZ) level of theory.

| Li(9-Crown-3)<br>(C <sub>3</sub> ) | Na(9-Crown-3)<br>(C <sub>3</sub> ) | Li(9-Crown-3) <sub>2</sub><br>(S <sub>6</sub> ) | [Li(9-Crown-3) <sub>2</sub> ] <sup>+</sup><br>(S <sub>6</sub> ) | Na(9-Crown-3) <sub>2</sub><br>(S <sub>6</sub> ) | [Na(9-Crown-3) <sub>2</sub> ] <sup>+</sup><br>(S <sub>6</sub> ) |
|------------------------------------|------------------------------------|-------------------------------------------------|-----------------------------------------------------------------|-------------------------------------------------|-----------------------------------------------------------------|
| O 1530882 0.289007 0.451158        | O -0.000000 1.604810 0.185816      | O -1.540830 0.289797 1.363390                   | O -1.540273 0.290917 1.377190                                   | O -1.578292 0.299190 1.737670                   | O -1.574958 0.299855 1.753515                                   |
| O -1.015729 1.217276 0.451158      | O -1.389806 -0.802405 0.185816     | O 1.021387 1.189449 1.363390                    | O 1.022128 1.188543 1.377190                                    | O 1.048252 1.214026 1.737670                    | O 1.047611 1.214026 1.753515                                    |
| O -0.515154 -1.470287 0.451158     | O 1.389806 -0.802405 0.185816      | O 0.519443 -1.479297 1.363390                   | O 0.518245 -1.479461 1.377190                                   | O 0.530040 -1.516436 1.737670                   | O 0.527796 -1.513881 1.753515                                   |
| C 1.209171 1.273776 -0.521730      | C -1.016776 1.418315 -0.780516     | C -1.207736 1.272602 2.339567                   | C -1.205936 1.271393 2.355530                                   | C -1.206732 1.271598 2.705484                   | C -1.204614 1.269525 2.725480                                   |
| C 0.498537 -1.684060 -0.521730     | C 1.766335 0.171311 -0.780516      | C -0.498238 -1.682231 2.339567                  | C -0.498091 -1.680068 2.355530                                  | C -0.497870 -1.680859 2.705484                  | C -0.497134 -1.677989 2.725480                                  |
| C 0.000000 2.050750 -0.292859      | C -2.009105 0.382273 -0.279226     | C 0.000000 2.052153 1.851073                    | C 0.000000 2.053204 1.863160                                    | C 0.000000 2.050734 2.211766                    | C 0.000000 2.051470 2.227713                                    |
| C -1.707708 0.410285 -0.521730     | C -0.719958 -1.589626 -0.780516    | C 1.705973 0.406629 2.339567                    | C 1.704027 0.408675 2.355530                                    | C 1.704602 0.409261 2.705484                    | C 1.701748 0.408464 2.725480                                    |
| C -1.776002 -1.025375 -0.029859    | C 0.673449 -1.930995 -0.279226     | C 1.777217 -1.026076 1.851073                   | C 1.778127 -1.026602 1.863160                                   | C 1.775988 -1.025367 2.211766                   | C 1.776625 -1.025735 2.227713                                   |
| C 1.776002 -1.025375 -0.029859     | C 1.335566 1.548722 -0.279226      | C -1.777217 -1.026076 1.851073                  | C -1.778127 -1.026602 1.863160                                  | C -1.775988 -1.025367 2.211766                  | C -1.776625 -1.025735 2.227713                                  |
| H 1.015005 0.805487 -1.487731      | H -0.587253 1.121600 1.738526      | H -1.015379 0.798632 3.301778                   | H -1.005524 0.793082 3.317272                                   | H -1.006182 0.794549 3.664254                   | H -0.996408 0.787502 3.680228                                   |
| H 2.055580 1.952455 -0.647014      | H -1.545129 2.361524 -0.942395     | H -2.056095 1.953865 2.477352                   | H -2.048312 1.950008 2.499421                                   | H -2.035906 1.962718 2.859072                   | H -2.034178 1.960614 2.886938                                   |
| H 1.919070 -1.281764 -1.487731     | H 1.264960 -0.522224 -1.738526     | H -0.184846 -1.277101 3.301778                  | H -0.184067 -1.267351 3.317272                                  | H -0.185008 -1.268654 3.664254                  | H -0.183793 -1.266665 3.680228                                  |
| H 0.663086 -2.756412 -0.647014     | H 2.811704 0.157359 -0.942395      | H -0.666650 -2.752887 2.477352                  | H -0.666460 -2.748894 2.499421                                  | H -0.668707 -2.746755 2.859072                  | H -0.668052 -2.741957 2.886938                                  |
| H 0.275263 -2.661210 0.628098      | H -2.455456 0.777051 0.520269      | H -0.275034 2.672358 1.001451                   | H -0.278103 2.667498 1.010619                                   | H -0.279466 2.667363 1.358574                   | H -0.282922 2.663146 1.372556                                   |
| H -0.382081 2.706580 0.815895      | H -2.740254 2.614437 -1.064128     | H 0.377424 2.699825 2.477352                    | H 0.378216 2.705410 2.652813                                    | H 0.354140 2.716831 3.003257                    | H 0.357102 2.720063 3.014733                                    |
| H -1.205075 0.462726 -1.487731     | H -0.677707 -1.069376 -1.738526    | H 1.198425 0.478469 3.301778                    | H 1.189592 0.474268 3.317272                                    | H 1.191191 0.474105 3.664254                    | H 1.188201 0.469163 3.680228                                    |
| H -2.718665 0.803957 -0.647014     | H 1.227720 -2.455348 -1.064128     | H 2.717445 0.799021 2.477352                    | H 2.712921 0.798886 2.499421                                    | H 2.721614 0.779538 2.859072                    | H 2.715030 0.778133 2.886938                                    |
| H -2.442307 -1.092220 0.828098     | H 0.599834 -2.593045 0.520269      | H 2.451847 -1.097993 1.001451                   | H 2.449173 -1.092904 1.010619                                   | H 2.449738 -1.091657 1.358574                   | H 2.447813 -1.086556 1.372556                                   |
| H -1.152926 -1.684182 -0.815895    | H 1.512324 2.290911 -1.064128      | H 2.149405 -1.676772 2.456545                   | H 2.153846 -1.680249 2.452813                                   | H 2.175775 -1.665109 3.003257                   | H 2.177093 -1.669291 3.014733                                   |
| H 2.535007 -1.022398 0.815895      | H 1.512324 2.290911 -1.064128      | H -2.526829 -1.023053 2.456545                  | H -2.532662 -1.025160 2.652813                                  | H -2.529915 -1.051722 3.003257                  | H -2.54194 -1.050772 3.014733                                   |
| H 2.167044 -1.568990 0.828098      | H 1.945725 1.815994 0.520269       | H -2.176813 -1.574366 1.001451                  | H -2.171069 -1.574594 1.010619                                  | H -2.170271 -1.575707 1.358574                  | H -2.164892 -1.576590 1.372556                                  |
| Li 0.000000 0.000000 1.822820      | Na 0.000000 0.000000 2.191337      | Li 0.000000 0.000000 0.000000                   | Li 0.000000 0.000000 0.000000                                   | Na 0.000000 0.000000 0.000000                   | Na 0.000000 0.000000 0.000000                                   |
| O -1.021387 -1.189449 -1.363390    | O -1.705973 0.404929 -2.339567     | O -1.021387 -1.189449 -1.363390                 | O -1.022128 -1.188543 -1.377190                                 | O -1.048252 -1.217246 -1.737670                 | O -1.047611 -1.214026 -1.753515                                 |
| C -1.777217 -1.026076 1.851073     | C 1.705973 0.406629 2.339567       | C -1.777217 -1.026076 1.851073                  | C -1.778127 -1.026602 1.863160                                  | C -1.774602 -1.049261 -2.705484                 | C -1.771748 -1.048464 -2.725480                                 |
| H -1.015379 0.798632 3.301778      | H -2.056095 1.953865 2.477352      | H -1.015379 0.798632 3.301778                   | H -1.012921 -0.798886 -2.499421                                 | H -1.011911 -0.474105 3.664254                  | H -1.011801 -0.469163 3.680228                                  |
| H -1.198425 0.478469 3.301778      | H 2.717445 0.799021 2.477352       | H -1.198425 0.478469 3.301778                   | H -1.189592 0.474268 3.317272                                   | H -1.191191 -0.474105 3.664254                  | H -1.188201 0.469163 3.680228                                   |
| H 2.451847 -1.097993 1.001451      | H 2.717445 0.799021 2.477352       | H 2.451847 -1.097993 1.001451                   | H -2.449173 -1.092904 1.010619                                  | H -2.449738 1.091657 1.358574                   | H -2.447813 1.086556 1.372556                                   |
| H 2.149405 -1.676772 2.456545      | H 2.717445 0.799021 2.477352       | H 2.149405 -1.676772 2.456545                   | H 2.153846 -1.680249 2.452813                                   | H 2.175775 -1.665109 3.003257                   | H 2.177093 -1.669291 3.014733                                   |
| C -1.777217 1.026076 -1.851073     | C -0.519443 1.479297 -1.363390     | C -1.777217 1.026076 -1.851073                  | C -1.778127 1.026602 -1.863160                                  | C -1.775988 1.025367 -2.211766                  | C -1.776625 1.025735 -2.227713                                  |
| O -0.519443 1.479297 -1.363390     | O 0.666750 2.752887 -2.477352      | O -0.519443 1.479297 -1.363390                  | O -0.518245 -1.479461 -1.377190                                 | O -0.530040 1.516436 -1.737670                  | O -0.527796 1.513881 -1.753515                                  |
| H 0.666750 2.752887 -2.477352      | C 0.498238 1.682231 -2.339567      | H 0.666750 2.752887 -2.477352                   | H 0.664600 2.748894 -2.499421                                   | H 0.668707 2.746755 -2.859072                   | H 0.668052 2.741957 -2.886938                                   |
| C 0.498238 1.682231 -2.339567      | O 1.848484 1.271101 -3.301778      | C 0.498238 1.682231 -2.339567                   | C 0.498101 1.680068 -2.355530                                   | C 0.497870 1.680859 -2.705484                   | C 0.497134 1.677989 -2.725480                                   |
| H 0.184846 1.271101 -3.301778      | H 1.777217 1.026076 -1.851073      | H 0.184846 1.271101 -3.301778                   | H 0.184067 1.267351 -3.317272                                   | H 0.185008 1.268654 -3.664254                   | H 0.183793 1.266665 -3.680228                                   |
| H 1.777217 1.026076 -1.851073      | H 2.526829 1.023053 -2.456545      | H 1.777217 1.026076 -1.851073                   | H 1.778127 1.026602 -1.863160                                   | H 1.775988 1.025367 -2.211766                   | H 1.776625 1.025735 -2.227713                                   |
| H 2.526829 1.023053 -2.456545      | H 2.176813 1.574366 -1.001451      | H 2.526829 1.023053 -2.456545                   | H 2.532662 1.025160 -2.652813                                   | H 2.529915 1.051722 -3.003257                   | H 2.534194 1.050772 -3.014733                                   |
| H 2.176813 1.574366 -1.001451      | O -1.540830 0.289797 1.363390      | H 2.176813 1.574366 -1.001451                   | H 2.171069 1.574594 1.010619                                    | H 2.170271 1.575707 1.358574                    | H 2.164892 1.576590 1.372556                                    |
| O -1.540830 0.289797 1.363390      | O 1.848484 1.271101 -3.301778      | O -1.540830 0.289797 1.363390                   | O -1.540373 -0.290917 -1.377190                                 | O -1.548292 -0.299190 -1.737670                 | O -1.547495 -0.299855 -1.753515                                 |
| C 1.207736 1.272602 2.339567       | C 1.207736 1.272602 2.339567       | C 1.207736 1.272602 2.339567                    | C 1.205936 1.271393 2.355530                                    | C 1.206732 1.271598 2.705484                    | C 1.204614 1.269525 2.725480                                    |
| O 1.015379 0.798632 3.301778       | O 1.015379 0.798632 3.301778       | O 1.015379 0.798632 3.301778                    | O 1.005524 0.793082 3.317272                                    | O 1.006182 0.794549 3.664254                    | O 0.996408 0.787502 3.680228                                    |
| H 1.198425 0.478469 3.301778       | H 1.198425 0.478469 3.301778       | H 1.198425 0.478469 3.301778                    | H 1.189592 0.474268 3.317272                                    | H 1.191191 0.474105 3.664254                    | H 1.188201 0.469163 3.680228                                    |
| H 2.451847 -1.097993 1.001451      | H 2.451847 -1.097993 1.001451      | H 2.451847 -1.097993 1.001451                   | H -2.449173 -1.092904 1.010619                                  | H -2.449738 1.091657 1.358574                   | H -2.447813 1.086556 1.372556                                   |
| H 2.149405 -1.676772 2.456545      | H 2.149405 -1.676772 2.456545      | H 2.149405 -1.676772 2.456545                   | H 2.153846 -1.680249 2.452813                                   | H 2.175775 -1.665109 3.003257                   | H 2.177093 -1.669291 3.014733                                   |
| C -1.777217 1.026076 -1.851073     | C -1.777217 1.026076 -1.851073     | C -1.777217 1.026076 -1.851073                  | C -1.778127 1.026602 -1.863160                                  | C -1.775988 1.025367 -2.211766                  | C -1.776625 1.025735 -2.227713                                  |
| O -0.519443 1.479297 -1.363390     | O -0.519443 1.479297 -1.363390     | O -0.519443 1.479297 -1.363390                  | O -0.518245 -1.479461 -1.377190                                 | O -0.530040 1.516436 -1.737670                  | O -0.527796 1.513881 -1.753515                                  |
| H 0.666750 2.752887 -2.477352      | H 0.666750 2.752887 -2.477352      | H 0.666750 2.752887 -2.477352                   | H 0.664600 2.748894 -2.499421                                   | H 0.668707 2.746755 -2.859072                   | H 0.668052 2.741957 -2.886938                                   |
| C 0.498238 1.682231 -2.339567      | C 0.498238 1.682231 -2.339567      | C 0.498238 1.682231 -2.339567                   | C 0.498101 1.680068 -2.355530                                   | C 0.497870 1.680859 -2.705484                   | C 0.497134 1.677989 -2.725480                                   |
| H 0.184846 1.271101 -3.301778      | H 0.184846 1.271101 -3.301778      | H 0.184846 1.271101 -3.301778                   | H 0.184067 1.267351 -3.317272                                   | H 0.185008 1.268654 -3.664254                   | H 0.183793 1.266665 -3.680228                                   |
| H 1.777217 1.026076 -1.851073      | H 1.777217 1.026076 -1.851073      | H 1.777217 1.026076 -1.851073                   | H 1.778127 1.026602 -1.863160                                   | H 1.775988 1.025367 -2.211766                   | H 1.776625 1.025735 -2.227713                                   |
| H 2.526829 1.023053 -2.456545      | H 2.526829 1.023053 -2.456545      | H 2.526829 1.023053 -2.456545                   | H 2.532662 1.025160 -2.652813                                   | H 2.529915 1.051722 -3.003257                   | H 2.534194 1.050772 -3.014733                                   |
| H 2.176813 1.574366 -1.001451      | H 2.176813 1.574366 -1.001451      | H 2.176813 1.574366 -1.001451                   | H 2.171069 1.574594 1.010619                                    | H 2.170271 1.575707 1.358574                    | H 2.164892 1.576590 1.372556                                    |
| O -1.540830 0.289797 1.363390      | O -1.540830 0.289797 1.363390      | O -1.540830 0.289797 1.363390                   | O -1.540373 -0.290917 -1.377190                                 | O -1.548292 -0.299190 -1.737670                 | O -1.547495 -0.299855 -1.753515                                 |
| C 1.207736 1.272602 2.339567       | C 1.207736 1.272602 2.339567       | C 1.207736 1.272602 2.339567                    | C 1.205936 1.271393 2.355530                                    | C 1.206732 1.271598 2.705484                    | C 1.204614 1.269525 2.725480                                    |
| O 1.015379 0.798632 3.301778       | O 1.015379 0.798632 3.301778       | O 1.015379 0.798632 3.301778                    | O 1.005524 0.793082 3.317272                                    | O 1.006182 0.794549 3.664254                    | O 0.996408 0.787502 3.680228                                    |
| H 1.198425 0.478469 3.301778       | H 1.198425 0.478469 3.301778       | H 1.198425 0.478469 3.301778                    | H 1.189592 0.474268 3.317272                                    | H 1.191191 0.474105 3.664254                    | H 1.188201 0.469163 3.680228                                    |
| H 2.451847 -1.097993 1.001451      | H 2.451847 -1.097993 1.001451      | H 2.451847 -1.097993 1.001451                   | H -2.449173 -1.092904 1.010619                                  | H -2.449738 1.091657 1.358574                   | H -2.447813 1.086556 1.372556                                   |
| H 2.149405 -1.676772 2.456545      | H 2.149405 -1.676772 2.456545      | H 2.149405 -1.676772 2.456545                   | H 2.153846 -1.680249 2.452813                                   | H 2.175775 -1.665109 3.003257                   | H 2.177093 -1.669291 3.014733                                   |
| C -1.777217 1.026076 -1.851073     | C -1.777217 1.026076 -1.851073     | C -1.777217 1.026076 -1.851073                  | C -1.778127 1.026602 -1.863160                                  | C -1.775988 1.025367 -2.211766                  | C -1.776625 1.025735 -2.227713                                  |
| O -0.519443 1.479297 -1.363390     | O -0.519443 1.479297 -1.363390     | O -0.519443 1.479297 -1.363390                  | O -0.518245 -1.479461 -1.377190                                 | O -0.530040 1.516436 -1.737670                  | O -0.527796 1.513881 -1.753515                                  |
| H 0.666750 2.752887 -2.477352      | H 0.666750 2.752887 -2.477352      | H 0.666750 2.752887 -2.477352                   | H 0.664600 2.748894 -2.499421                                   | H 0.668707 2.746755 -2.859072                   | H 0.668052 2.741957 -2.886938                                   |
| C 0.498238 1.682231 -2.339567      | C 0.498238 1.682231 -2.339567      | C 0.498238 1.682231 -2.339567                   | C 0.498101 1.680068 -2.355530                                   | C 0.497870 1.680859 -2.705484                   | C 0.497134 1.677989 -2.725480                                   |
| H 0.184846 1.271101 -3.301778      | H 0.184846 1.271101 -3.301778      | H 0.184846 1.271101 -3.301778                   | H 0.184067 1.267351 -3.317272                                   | H 0.185008 1.268654 -3.664254                   | H 0.183793 1.266665 -3.680228                                   |
| H 1.77                             |                                    |                                                 |                                                                 |                                                 |                                                                 |

Table S3. Optimized geometries of  $[M(o-Me_2-1.1.1)]^{0/+}$  ( $M = Li, Na$ ) at CAM-B3LYP (Li/Na,C,O: cc-pVDZ and H: aug-cc-pVDZ) level of theory.

| Li(o-Me <sub>2</sub> -1.1.1) |                   | [Li(o-Me <sub>2</sub> -1.1.1)] <sup>+</sup> |                    | Li(o-Me <sub>2</sub> -1.1.1) |                    | [Li(o-Me <sub>2</sub> -1.1.1)] <sup>+</sup> |                    | Na(o-Me <sub>2</sub> -1.1.1) |                    | [Na(o-Me <sub>2</sub> -1.1.1)] <sup>+</sup> |                    |   |           |           |           |
|------------------------------|-------------------|---------------------------------------------|--------------------|------------------------------|--------------------|---------------------------------------------|--------------------|------------------------------|--------------------|---------------------------------------------|--------------------|---|-----------|-----------|-----------|
| (C <sub>i</sub> )            | (C <sub>i</sub> ) | (C <sub>3h</sub> )                          | (C <sub>3h</sub> ) | (C <sub>3h</sub> )           | (C <sub>3h</sub> ) | (C <sub>3h</sub> )                          | (C <sub>3h</sub> ) | (C <sub>3h</sub> )           | (C <sub>3h</sub> ) | (C <sub>3h</sub> )                          | (C <sub>3h</sub> ) |   |           |           |           |
| C                            | 2.726643          | 0.073443                                    | -0.025054          | C                            | 2.688229           | 0.042174                                    | 0.004064           | C                            | 0.000000           | 0.000000                                    | 2.642273           | C | 0.000000  | 0.000000  | 2.799511  |
| C                            | 4.238034          | -0.036315                                   | -0.134599          | C                            | 4.202831           | -0.013190                                   | -0.027481          | C                            | 0.000000           | 0.000000                                    | 4.157156           | C | 0.000000  | 0.000000  | 4.310861  |
| C                            | -2.726765         | 0.072908                                    | -0.025002          | C                            | -2.688250          | 0.042199                                    | 0.003895           | C                            | 0.000000           | 0.000000                                    | -2.642273          | C | 0.000000  | 0.000000  | -2.799511 |
| C                            | -4.238047         | -0.037322                                   | -0.134354          | C                            | -4.202854          | -0.013078                                   | -0.027810          | C                            | 0.000000           | 0.000000                                    | -4.157156          | C | 0.000000  | 0.000000  | -4.310861 |
| O                            | -2.208034         | 1.117285                                    | -0.791941          | O                            | -2.156346          | 1.137347                                    | -0.669764          | O                            | 0.907747           | -0.905155                                   | -2.072390          | O | 0.907100  | -0.902846 | -2.078058 |
| O                            | -2.051007         | -1.080692                                   | 0.469236           | O                            | -2.073158          | -1.080440                                   | -0.603541          | O                            | -1.235761          | -0.330090                                   | -2.072390          | O | -1.235438 | -0.334149 | -2.078058 |
| O                            | -2.299813         | 0.260064                                    | 1.288384           | O                            | -2.256590          | 0.067602                                    | 1.292732           | O                            | 0.332014           | 1.235245                                    | -2.072390          | O | 0.328337  | 1.236995  | -2.078058 |
| O                            | 0.000203          | -1.860784                                   | -1.838567          | O                            | 0.000100           | -1.498417                                   | -2.123083          | O                            | -1.907993          | -1.918293                                   | 0.000000           | O | -1.913317 | -1.925614 | 0.000000  |
| O                            | -0.000360         | 2.804128                                    | -0.271327          | O                            | 0.000066           | 2.763771                                    | -0.038328          | O                            | 2.652827           | -0.699324                                   | 0.000000           | O | 2.624289  | -0.694174 | 0.000000  |
| O                            | 0.000204          | -0.979704                                   | 2.214827           | O                            | -0.000128          | -1.232062                                   | 2.253411           | O                            | -0.707294          | 2.611517                                    | 0.000000           | O | -0.710972 | 2.619788  | 0.000000  |
| O                            | 2.051389          | -1.080492                                   | -0.469005          | O                            | 2.073165           | -1.080449                                   | -0.603407          | O                            | -1.235761          | -0.330090                                   | 2.072390           | O | -1.235438 | -0.334149 | 2.078058  |
| O                            | 2.299959          | 0.260364                                    | 1.288414           | O                            | 2.256600           | 0.067582                                    | 1.292839           | O                            | 0.332014           | 1.235245                                    | 2.072390           | O | 0.328337  | 1.236995  | 2.078058  |
| O                            | 2.270464          | 1.117610                                    | -0.791966          | O                            | 2.156449           | 1.137307                                    | -0.669639          | O                            | 0.907747           | -0.905155                                   | 2.072390           | O | 0.907100  | -0.902846 | 2.078058  |
| O                            | 0.000078          | -0.973375                                   | 0.052538           | O                            | 0.000050           | -0.909275                                   | -0.149777          | O                            | 0.000000           | 0.000000                                    | 0.000000           | O | 0.000000  | 0.000000  | 0.000000  |
| C                            | 2.401550          | -0.854187                                   | 2.176147           | C                            | 2.365294           | -0.074788                                   | 2.124084           | C                            | -0.503926          | 2.344988                                    | 2.331848           | C | -0.504064 | 2.345834  | 2.331285  |
| C                            | 1.634147          | -0.868167                                   | 3.028487           | C                            | 1.172866           | -1.159401                                   | 3.037632           | C                            | -0.349631          | 3.297872                                    | 1.181455           | C | -0.347882 | 3.301596  | 1.183763  |
| C                            | 2.315965          | -1.557383                                   | -1.792710          | C                            | 2.328817           | -1.131211                                   | -1.991513          | C                            | -1.765356          | -1.632289                                   | 2.331848           | C | -1.761320 | -1.640973 | 2.331285  |
| C                            | 1.198613          | -2.515920                                   | -1.123299          | C                            | 1.193990           | -2.180793                                   | -2.471286          | C                            | -2.681226          | -1.951725                                   | 1.181455           | C | -2.685325 | -1.952072 | 1.183763  |
| C                            | 2.338527          | 2.455549                                    | -0.322986          | C                            | 2.334699           | 2.441824                                    | -0.108242          | C                            | 2.296282           | -0.712699                                   | 2.331848           | C | 2.301784  | -0.704862 | 2.331285  |
| C                            | 1.183780          | 3.242790                                    | -0.892699          | C                            | 1.184901           | 3.287904                                    | -0.593021          | C                            | 3.030856           | -1.346147                                   | 1.181455           | C | 3.033207  | -1.349524 | 1.183763  |
| C                            | -2.329206         | 2.455064                                    | -0.322587          | C                            | -2.334574          | 2.441825                                    | -0.108186          | C                            | 2.296282           | -0.712699                                   | 2.331848           | C | 2.301784  | -0.704862 | -2.331285 |
| C                            | -1.184725         | 3.242831                                    | -0.892377          | C                            | -1.184788          | 3.287924                                    | -0.592962          | C                            | 3.030856           | -1.346147                                   | -1.181455          | C | 3.033207  | -1.349524 | -1.183763 |
| C                            | -1.198104         | -2.515972                                   | -1.123579          | C                            | -1.193789          | -2.180760                                   | -2.471362          | C                            | -2.681226          | -1.951725                                   | -1.181455          | C | -2.685325 | -1.952072 | -1.183763 |
| C                            | -2.315598         | -1.557599                                   | -1.792869          | C                            | -2.328622          | -1.131314                                   | -1.991696          | C                            | -1.765356          | -1.632289                                   | -2.331848          | C | -1.761320 | -1.640973 | -2.331285 |
| C                            | -1.162992         | -0.868064                                   | 3.028531           | C                            | -1.173185          | -1.159454                                   | 3.037551           | C                            | -0.349631          | 3.297872                                    | -1.181455          | C | -0.347882 | 3.301596  | -1.183763 |
| C                            | -2.401218         | -0.854340                                   | 2.176347           | C                            | -2.365547          | -0.074797                                   | 2.123917           | C                            | -0.503926          | 2.344988                                    | -2.331848          | C | -0.504064 | 2.345834  | -2.331285 |
| H                            | 4.603681          | -0.914417                                   | 0.412901           | H                            | 4.570652           | -0.927616                                   | 0.453427           | H                            | -0.787068          | 0.663077                                    | 4.538765           | H | -0.775888 | 0.674687  | 4.542732  |
| H                            | 4.693970          | 0.063106                                    | 0.299720           | H                            | 4.612425           | 0.051802                                    | 0.508084           | H                            | 0.967776           | 0.350082                                    | 4.538765           | H | 0.972226  | 0.345469  | 4.542732  |
| H                            | 4.549001          | -0.115503                                   | -1.182624          | H                            | 4.568185           | -0.015739                                   | -1.060569          | H                            | -0.180708          | -1.013159                                   | 4.538765           | H | -0.196367 | -1.009257 | 4.542732  |
| H                            | -4.549152         | -0.116454                                   | -1.182343          | H                            | -4.568102          | -0.015891                                   | -1.060934          | H                            | -0.180708          | -1.013159                                   | -4.538765          | H | -0.196367 | -1.009257 | -4.542732 |
| H                            | -4.694198         | 0.061982                                    | 0.298356           | H                            | -4.612467          | 0.051919                                    | 0.507734           | H                            | 0.967776           | 0.350082                                    | -4.538765          | H | 0.972226  | 0.345469  | -4.542732 |
| H                            | -4.603333         | -0.915614                                   | 0.413078           | H                            | -4.570765          | -0.927499                                   | 0.453041           | H                            | -0.787068          | 0.663077                                    | -4.538765          | H | -0.775888 | 0.674687  | -4.542732 |
| H                            | 3.286162          | -0.740562                                   | 2.823352           | H                            | 3.283826           | -0.954305                                   | 2.718749           | H                            | -0.252637          | 2.832515                                    | 3.280006           | H | -0.273763 | 2.830833  | 3.282373  |
| H                            | 2.487652          | -1.795444                                   | 1.616522           | H                            | 2.444811           | -1.981921                                   | 1.510099           | H                            | -1.573840          | 2.002711                                    | 2.384104           | H | -1.582464 | 2.000134  | 2.368364  |
| H                            | 3.285578          | -2.077781                                   | -1.827365          | H                            | 3.292403           | -1.825569                                   | -2.128178          | H                            | -2.326711          | -1.635048                                   | 3.280006           | H | -2.314692 | -1.652502 | 3.282373  |
| H                            | 2.313741          | -0.707258                                   | -2.489336          | H                            | 2.333900           | -0.355072                                   | -2.528744          | H                            | -0.944778          | -2.364341                                   | 2.384104           | H | -0.940935 | -2.370521 | 2.368364  |
| H                            | 3.293586          | 2.887639                                    | -0.665954          | H                            | 3.291378           | 2.870447                                    | -0.444827          | H                            | 2.579349           | -1.197467                                   | 3.280006           | H | 2.580454  | -1.178331 | 3.282373  |
| H                            | 2.296420          | 2.477423                                    | 0.773687           | H                            | 2.318043           | 2.379928                                    | 0.987677           | H                            | 2.521318           | 0.361630                                    | 2.384104           | H | 2.523399  | 0.370387  | 2.368364  |
| H                            | -2.296872         | 2.476668                                    | 0.774090           | H                            | -2.317889          | 2.379862                                    | 0.987731           | H                            | 2.521318           | 0.361630                                    | -2.384104          | H | 2.523399  | 0.370387  | -2.368364 |
| H                            | -3.285113         | -2.078180                                   | -1.827520          | H                            | -3.292219          | -1.825429                                   | -2.128522          | H                            | -2.326711          | -1.635048                                   | -3.280006          | H | -2.314692 | -1.652502 | -3.282373 |
| H                            | -2.313981         | -0.707470                                   | -2.489536          | H                            | -2.333572          | -0.354977                                   | -2.528892          | H                            | -0.944778          | -2.364341                                   | -2.384104          | H | -0.940935 | -2.370521 | -2.368364 |
| H                            | -3.285788         | -0.740727                                   | 2.823616           | H                            | -3.284123          | -0.954333                                   | 2.718519           | H                            | -0.252637          | 2.832515                                    | -3.280006          | H | -0.273763 | 2.830833  | -3.282373 |
| H                            | -2.487247         | -1.795710                                   | 1.616918           | H                            | -2.445025          | -1.981904                                   | 1.509801           | H                            | -1.573840          | 2.002711                                    | -2.384104          | H | -1.582464 | 2.000134  | -2.368364 |
| H                            | 1.252920          | -3.424677                                   | -1.486399          | H                            | 1.216407           | -3.169932                                   | -1.981103          | H                            | -3.492984          | -1.204583                                   | 1.122728           | H | -3.488257 | -1.195692 | 1.127459  |
| H                            | 1.241710          | -2.814712                                   | -3.175835          | H                            | 1.258172           | -2.326760                                   | -3.562097          | H                            | -1.316208          | -2.948425                                   | 1.329611           | H | -1.314993 | -2.942412 | 1.332496  |
| H                            | -1.252414         | -3.424855                                   | -1.486865          | H                            | -1.216274          | -3.169889                                   | -1.981162          | H                            | -3.492984          | -1.204583                                   | -1.122728          | H | -3.488257 | -1.195692 | -1.127459 |
| H                            | -1.241056         | -2.814553                                   | -3.176183          | H                            | -1.257893          | -2.326746                                   | -3.562175          | H                            | -1.316208          | -2.948425                                   | -1.329611          | H | -1.314993 | -2.942412 | -1.332496 |
| H                            | 1.095523          | 0.064881                                    | 3.613953           | H                            | 1.091056           | -0.230866                                   | 3.628246           | H                            | 0.703292           | 3.627304                                    | 1.122728           | H | 0.708628  | 3.618765  | 1.127459  |
| H                            | 1.121661          | -1.722210                                   | 3.727213           | H                            | 1.129635           | -2.006231                                   | 3.735283           | H                            | -0.985307          | 4.190248                                    | 1.329611           | H | -0.973238 | 4.199126  | 1.332496  |
| H                            | -1.095108         | 0.065122                                    | 3.613777           | H                            | -1.091428          | -0.230953                                   | 3.628225           | H                            | 0.703292           | 3.627304                                    | -1.122728          | H | 0.708628  | 3.618765  | -1.127459 |
| H                            | -1.121214         | -1.721944                                   | 3.727458           | H                            | -1.292989          | -2.006327                                   | 3.735142           | H                            | -0.985307          | 4.190248                                    | -1.329611          | H | -0.973238 | 4.199126  | -1.332496 |
| H                            | 1.127265          | 3.079784                                    | -1.984676          | H                            | 1.136647           | 3.260224                                    | -1.696871          | H                            | 2.789692           | -2.422721                                   | 1.122728           | H | 2.779628  | -2.423073 | 1.127459  |
| H                            | 1.348197          | 4.322791                                    | -0.713354          | H                            | 1.341527           | 4.336590                                    | -0.281403          | H                            | 4.121515           | -1.241823                                   | 1.329611           | H | 4.123169  | -1.256714 | 1.332496  |
| H                            | -1.128399         | 3.079886                                    | -1.984399          | H                            | -1.136567          | 3.260289                                    | -1.696815          | H                            | 2.789692           | -2.422721                                   | -1.122728          | H | 2.779628  | -2.423073 | -1.127459 |
| H                            | -1.349319         | 4.322581                                    | -0.712772          | H                            | -1.341402          | 4.336599                                    | -0.281298          | H                            | 4.121515           | -1.241823                                   | -1.329611          | H | 4.123169  | -1.256714 | -1.332496 |
| H                            | -3.294421         | 2.887051                                    | -0.665243          | H                            | -3.291260          | 2.870472                                    | -0.444719          | H                            | 2.579349           | -1.197467                                   | -3.280006          | H | 2.580454  | -1.178331 | -3.282373 |

Table S4. Optimized geometries of [M(24-Crown-8)]<sup>0/+</sup> (M = Li, Na) at CAM-B3LYP (Na/K,C,O: cc-pVDZ and H: aug-cc-pVDZ) level of theory.

| Na(24-Crown-8)<br>(S <sub>i</sub> ) |           |           | [Na(24-Crown-8)] <sup>+</sup><br>(S <sub>i</sub> ) |    |           | K(24-Crown-8)<br>(S <sub>i</sub> ) |           |   | [K(24-Crown-8)] <sup>+</sup><br>(S <sub>i</sub> ) |           |           |   |           |           |           |
|-------------------------------------|-----------|-----------|----------------------------------------------------|----|-----------|------------------------------------|-----------|---|---------------------------------------------------|-----------|-----------|---|-----------|-----------|-----------|
| Na                                  | 0.000000  | 0.000000  | 0.000000                                           | Na | 0.000000  | 0.000000                           | 0.000000  | K | 0.000000                                          | 0.000000  | 0.000000  | K | 0.000000  | 0.000000  | 0.000000  |
| O                                   | -1.416934 | 0.592792  | 1.979135                                           | O  | -1.362096 | 0.735270                           | 1.961848  | O | -1.746962                                         | 1.078416  | 1.853436  | O | -1.731895 | 1.138241  | 1.884172  |
| O                                   | 0.000000  | 2.461218  | 0.468663                                           | O  | 0.242636  | 2.484727                           | 0.480463  | O | 0.000000                                          | 2.839159  | 0.451957  | O | 0.000000  | 2.843578  | 0.393599  |
| O                                   | 0.592792  | 1.416934  | -1.979135                                          | O  | 0.735270  | 1.360296                           | -1.961848 | O | 1.078416                                          | 1.746962  | -1.853436 | O | 1.138241  | 1.731895  | -1.884172 |
| O                                   | 2.461218  | -0.000000 | -0.468663                                          | O  | 2.484727  | -0.242636                          | -0.480463 | O | 2.839159                                          | -0.000000 | -0.451957 | O | 2.843578  | -0.000000 | -0.393599 |
| C                                   | -2.817499 | 0.689956  | 1.770405                                           | C  | -2.749880 | 0.950699                           | 1.764951  | C | -3.123999                                         | 1.178568  | 1.586469  | C | -3.122177 | 1.229450  | 1.620091  |
| H                                   | -3.095812 | 1.705690  | 1.448836                                           | H  | -2.942814 | 1.984179                           | 1.438157  | H | -3.359410                                         | 2.097895  | 1.020543  | H | -3.350624 | 2.134652  | 1.034219  |
| H                                   | -3.358879 | 0.463540  | 2.706427                                           | H  | -3.299673 | 0.776520                           | 2.705586  | H | -3.699503                                         | 1.199738  | 2.534323  | H | -3.685379 | 1.276448  | 2.568655  |
| C                                   | -0.822691 | 1.735547  | 2.580758                                           | C  | -0.669696 | 1.816824                           | 2.576718  | C | -1.172147                                         | 2.239365  | 2.433284  | C | -1.160323 | 2.329074  | 2.406778  |
| H                                   | 0.178160  | 1.409731  | 2.891163                                           | H  | 0.297313  | 1.401091                           | 2.886648  | H | -0.220401                                         | 1.911371  | 2.875034  | H | -0.205277 | 2.029100  | 2.858910  |
| H                                   | -1.386079 | 2.046360  | 3.478159                                           | H  | -1.207012 | 2.167772                           | 3.473933  | H | -1.807090                                         | 2.625214  | 3.249924  | H | -1.797204 | 2.752018  | 3.202848  |
| C                                   | -0.716837 | 2.895234  | 1.612158                                           | C  | -0.459178 | 2.969286                           | 1.615190  | C | -0.922531                                         | 3.326493  | 1.409707  | C | -0.917847 | 3.371362  | 1.335339  |
| H                                   | 1.714617  | -3.254867 | 1.310107                                           | H  | 1.422471  | -3.401555                          | 1.298148  | H | 1.862113                                          | -3.619320 | 0.909410  | H | 1.860837  | -3.641889 | 0.829809  |
| H                                   | -0.192097 | 3.739015  | 2.096995                                           | H  | 0.117104  | 3.769434                           | 2.110841  | H | -0.514643                                         | 4.223052  | 1.911252  | H | -0.510158 | 4.289638  | 1.794375  |
| C                                   | -0.290728 | -3.214121 | -0.698112                                          | C  | 0.000000  | -3.233530                          | -0.701020 | C | -0.014174                                         | -3.555213 | -0.770058 | C | 0.019226  | -3.552483 | -0.834121 |
| H                                   | -0.188747 | 4.296452  | -0.502564                                          | H  | 0.170402  | 4.309653                           | -0.526703 | H | 0.044964                                          | 4.643151  | -0.587178 | H | 0.080604  | 4.640276  | -0.655891 |
| H                                   | -1.329829 | 3.015648  | -1.017422                                          | H  | -1.048670 | 3.092738                           | -1.017985 | H | -0.951548                                         | 3.346150  | -1.317386 | H | -0.908160 | 3.347520  | -1.399073 |
| C                                   | 0.689956  | 2.817499  | -1.770405                                          | C  | 0.950699  | 2.749880                           | -1.764951 | C | 1.178568                                          | 3.132999  | -1.586469 | C | 1.229450  | 3.122177  | -1.620091 |
| H                                   | 0.463540  | 3.358879  | -2.706427                                          | H  | 0.776520  | 3.299673                           | -2.705586 | H | 1.199738                                          | 3.699503  | -2.534323 | H | 1.276448  | 3.685379  | -2.568655 |
| H                                   | 1.386079  | 3.095812  | -1.448836                                          | H  | 1.984179  | 2.942814                           | -1.438157 | H | 2.097895                                          | 3.359410  | -1.020543 | H | 2.134652  | 3.350624  | -1.034219 |
| C                                   | 1.735547  | 0.822691  | -2.580758                                          | C  | 1.816824  | 0.669696                           | -2.576718 | C | 2.239365                                          | 1.172147  | -2.433284 | C | 2.329074  | 1.160323  | -2.406778 |
| H                                   | 2.046360  | -3.358879 | -3.478159                                          | H  | 2.167772  | -3.401555                          | -3.473933 | H | 2.625214                                          | -3.619320 | -3.249924 | H | 2.752018  | -3.641889 | -3.202848 |
| H                                   | 1.409731  | -0.178160 | -2.891163                                          | H  | 1.401091  | -0.297313                          | -2.886648 | H | 1.911371                                          | -0.220401 | -2.875034 | H | 2.029100  | -0.205277 | -2.858910 |
| C                                   | 2.895234  | 0.716837  | -1.612158                                          | C  | 2.969286  | 0.459178                           | -1.615190 | C | 3.326493                                          | 0.922531  | -1.409707 | C | 3.371362  | 0.917847  | -1.335339 |
| H                                   | 3.739015  | 0.192097  | -2.096995                                          | H  | 3.769434  | -0.117104                          | -2.110841 | H | 4.223052                                          | 0.514643  | -1.911252 | H | 4.289638  | 0.510158  | -1.794375 |
| H                                   | 3.254867  | 1.714617  | -1.310107                                          | H  | 3.401555  | 1.422471                           | -1.298148 | H | 3.619320                                          | 1.862113  | -0.909410 | H | 3.641889  | 1.860837  | -0.829809 |
| C                                   | 3.214121  | 0.290728  | 0.698112                                           | C  | 3.233530  | -0.000000                          | 0.701020  | C | 3.555213                                          | 0.014174  | 0.770058  | C | 3.552483  | -0.019226 | 0.834121  |
| H                                   | 3.015648  | 1.329829  | 1.017422                                           | H  | 3.092738  | 1.048670                           | 1.017985  | H | 3.346150                                          | 0.951548  | 1.317386  | H | 3.347520  | 0.908160  | 1.399073  |
| H                                   | 4.296452  | 0.188747  | 0.502564                                           | H  | 4.309653  | -0.170402                          | 0.526703  | H | 4.643151                                          | -0.044964 | 0.587178  | H | 4.640276  | -0.080604 | 0.655891  |
| O                                   | 1.416934  | -0.592792 | 1.979135                                           | O  | 1.360296  | -0.735270                          | 1.961848  | O | 1.746962                                          | -1.078416 | 1.853436  | O | 1.731895  | -1.138241 | 1.884172  |
| O                                   | -0.000000 | -2.461218 | 0.468663                                           | O  | -0.242636 | -2.484727                          | 0.480463  | O | -0.000000                                         | -2.839159 | 0.451957  | O | -0.000000 | -2.843578 | 0.393599  |
| O                                   | -0.592792 | -1.416934 | -1.979135                                          | O  | -0.735270 | -1.360296                          | -1.961848 | O | -1.078416                                         | -1.746962 | -1.853436 | O | -1.138241 | -1.731895 | -1.884172 |
| O                                   | -2.461218 | 0.000000  | 0.468663                                           | O  | -2.484727 | 0.242636                           | 0.480463  | O | -2.839159                                         | 0.000000  | 0.451957  | O | -2.843578 | 0.000000  | 0.393599  |
| C                                   | 2.817499  | -0.689956 | 1.770405                                           | C  | 2.749880  | -0.950699                          | 1.764951  | C | 3.123999                                          | -1.178568 | 1.586469  | C | 3.122177  | -1.229450 | 1.620091  |
| H                                   | 3.095812  | -1.705690 | 1.448836                                           | H  | 2.942814  | -1.984179                          | 1.438157  | H | 3.359410                                          | -2.097895 | 1.020543  | H | 3.350624  | -2.134652 | 1.034219  |
| H                                   | 3.358879  | -0.463540 | 2.706427                                           | H  | 3.299673  | -0.776520                          | 2.705586  | H | 3.699503                                          | -1.199738 | 2.534323  | H | 3.685379  | -1.276448 | 2.568655  |
| C                                   | 0.822691  | -1.735547 | 2.580758                                           | C  | 0.669696  | -1.816824                          | 2.576718  | C | 1.172147                                          | -2.239365 | 2.433284  | C | 1.160323  | -2.329074 | 2.406778  |
| H                                   | -0.178160 | -1.409731 | 2.891163                                           | H  | -0.297313 | -1.401091                          | 2.886648  | H | 0.220401                                          | -1.911371 | 2.875034  | H | 0.205277  | -2.029100 | 2.858910  |
| H                                   | 1.386079  | -2.046360 | 3.478159                                           | H  | 1.207012  | -2.167772                          | 3.473933  | H | 1.807090                                          | -2.625214 | 3.249924  | H | 1.797204  | -2.752018 | 3.202848  |
| C                                   | 0.716837  | -2.895234 | 1.612158                                           | C  | 0.459178  | -2.969286                          | 1.615190  | C | 0.922531                                          | -3.326493 | 1.409707  | C | 0.917847  | -3.371362 | 1.335339  |
| H                                   | 1.714617  | -3.254867 | 1.310107                                           | H  | 1.422471  | -3.401555                          | 1.298148  | H | 1.862113                                          | -3.619320 | 0.909410  | H | 1.860837  | -3.641889 | 0.829809  |
| H                                   | 0.192097  | 3.739015  | 2.096995                                           | H  | 0.117104  | 3.769434                           | 2.110841  | H | 0.514643                                          | 4.223052  | 1.911252  | H | 0.510158  | 4.289638  | 1.794375  |
| C                                   | -0.290728 | -3.214121 | -0.698112                                          | C  | 0.000000  | -3.233530                          | -0.701020 | C | -0.014174                                         | -3.555213 | -0.770058 | C | -0.019226 | -3.552483 | -0.834121 |
| H                                   | 0.188747  | -4.296452 | -0.502564                                          | H  | -0.170402 | -4.309653                          | -0.526703 | H | -0.044964                                         | -4.643151 | -0.587178 | H | -0.080604 | -4.640276 | -0.655891 |
| H                                   | 1.329829  | -3.015648 | -1.017422                                          | H  | 1.048670  | -3.092738                          | -1.017985 | H | 0.951548                                          | -3.346150 | -1.317386 | H | 0.908160  | -3.347520 | -1.399073 |
| C                                   | -0.689956 | -2.817499 | -1.770405                                          | C  | -0.950699 | -2.749880                          | -1.764951 | C | -1.178568                                         | -3.132999 | -1.586469 | C | -1.229450 | -3.122177 | -1.620091 |
| H                                   | -0.463540 | -3.358879 | -2.706427                                          | H  | -0.776520 | -3.299673                          | -2.705586 | H | -1.199738                                         | -3.699503 | -2.534323 | H | -1.276448 | -3.685379 | -2.568655 |
| H                                   | -1.386079 | -3.095812 | -1.448836                                          | H  | -1.984179 | -2.942814                          | -1.438157 | H | -2.097895                                         | -3.359410 | -1.020543 | H | -2.134652 | -3.350624 | -1.034219 |
| C                                   | -1.735547 | -0.822691 | -2.580758                                          | C  | -1.816824 | -0.669696                          | -2.576718 | C | -2.239365                                         | -1.172147 | -2.433284 | C | -2.329074 | -1.160323 | -2.406778 |
| H                                   | -2.046360 | -3.358879 | -3.478159                                          | H  | -2.167772 | -3.401555                          | -3.473933 | H | -2.625214                                         | -3.619320 | -3.249924 | H | -2.752018 | -3.641889 | -3.202848 |
| H                                   | -1.409731 | -0.178160 | -2.891163                                          | H  | -1.401091 | -0.297313                          | -2.886648 | H | -1.911371                                         | -0.220401 | -2.875034 | H | -2.029100 | -0.205277 | -2.858910 |
| C                                   | -2.895234 | -0.716837 | -1.612158                                          | C  | -2.969286 | -0.459178                          | -1.615190 | C | -3.326493                                         | -0.922531 | -1.409707 | C | -3.371362 | -0.917847 | -1.335339 |
| H                                   | -3.739015 | -0.192097 | -2.096995                                          | H  | -3.769434 | 0.117104                           | -2.110841 | H | -4.223052                                         | 0.514643  | -1.911252 | H | -4.289638 | 0.510158  | -1.794375 |
| H                                   | -3.254867 | -1.714617 | -1.310107                                          | H  | -3.401555 | -1.422471                          | -1.298148 | H | -3.619320                                         | -1.862113 | -0.909410 | H | -3.641889 | -1.860837 | -0.829809 |
| C                                   | -3.214121 | -0.290728 | 0.698112                                           | C  | -3.233530 | 0.000000                           | 0.701020  | C | -3.555213                                         | -0.014174 | 0.770058  | C | -3.552483 | 0.019226  | 0.834121  |
| H                                   | -3.015648 | -1.329829 | 1.017422                                           | H  | -3.092738 | 1.048670                           | 1.017985  | H | -3.346150                                         | 0.951548  | 1.317386  | H | -3.347520 | 0.908160  | 1.399073  |
| H                                   | -4.296452 | -0.188747 | 0.502564                                           | H  | -4.309653 | 0.170402                           | 0.526703  | H | -4.643151                                         | 0.044964  | 0.587178  | H | -4.640276 | 0.080604  | 0.655891  |

Table S5. Optimized geometries of  $[\text{Li}(\text{3}^6\text{Adamanzane})]^{0/+}$  at CAM-B3LYP (Li,N,C: cc-pVDZ and H: aug-cc-pVDZ) level of theory.

| Li(3 <sup>6</sup> Adamanzane) |           |           |           | Li(3 <sup>6</sup> Adamanzane) <sup>+</sup> |           |           |           |
|-------------------------------|-----------|-----------|-----------|--------------------------------------------|-----------|-----------|-----------|
| (S <sub>0</sub> )             |           |           |           | (S <sub>1</sub> )                          |           |           |           |
| N                             | 1.165907  | 1.106903  | 1.128132  | N                                          | 1.164614  | 1.108750  | 1.128407  |
| C                             | 0.569111  | 2.433495  | 1.366884  | C                                          | 0.565005  | 2.434886  | 1.367459  |
| H                             | 1.316962  | 3.101090  | 1.839330  | H                                          | 1.308047  | 3.103350  | 1.842218  |
| H                             | -0.238910 | 2.317884  | 2.099851  | H                                          | -0.247545 | 2.314384  | 2.095372  |
| C                             | 0.000000  | 3.113740  | 0.121492  | C                                          | 0.000000  | 3.113978  | 0.118106  |
| H                             | 0.779091  | 3.255756  | -0.639495 | H                                          | 0.780781  | 3.245097  | -0.643123 |
| H                             | -0.282099 | 4.135316  | 0.422255  | H                                          | -0.275294 | 4.138011  | 0.410546  |
| C                             | -1.256560 | 2.491865  | -0.491433 | C                                          | -1.259453 | 2.491609  | -0.492011 |
| H                             | -2.014158 | 2.400097  | 0.297295  | H                                          | -2.013623 | 2.396939  | 0.299893  |
| H                             | -1.674319 | 3.200434  | -1.234566 | H                                          | -1.678933 | 3.199538  | -1.232279 |
| N                             | -1.106903 | 1.165907  | -1.128132 | N                                          | -1.108750 | 1.164614  | -1.128407 |
| C                             | -2.433495 | 0.569111  | -1.366884 | C                                          | -2.434886 | 0.565005  | -1.367459 |
| H                             | -2.317884 | -0.238910 | -2.099851 | H                                          | -2.314384 | -0.247545 | -2.095372 |
| H                             | -3.101090 | 1.316962  | -1.839330 | H                                          | -3.103350 | 1.308047  | -1.842218 |
| C                             | -3.113740 | 0.000000  | -0.121492 | C                                          | -3.113978 | 0.000000  | -0.118106 |
| H                             | -4.135316 | -0.282099 | -0.422255 | H                                          | -4.138011 | -0.275294 | -0.410546 |
| H                             | -3.255756 | 0.779091  | 0.639495  | H                                          | -3.245097 | 0.780781  | 0.643123  |
| C                             | -2.491865 | -1.256560 | 0.491433  | C                                          | -2.491609 | -1.259453 | 0.492011  |
| H                             | -3.200434 | -1.674319 | 1.234566  | H                                          | -3.199538 | -1.678933 | 1.232279  |
| H                             | -2.400097 | -2.014158 | -0.297295 | H                                          | -2.396939 | -2.013623 | -0.299893 |
| N                             | -1.165907 | -1.106903 | 1.128132  | N                                          | -1.164614 | -1.108750 | 1.128407  |
| C                             | -0.569111 | -2.433495 | 1.366884  | C                                          | -0.565005 | -2.434886 | 1.367459  |
| H                             | -1.316962 | -3.101090 | 1.839330  | H                                          | -1.308047 | -3.103350 | 1.842218  |
| H                             | 0.238910  | -2.317884 | 2.099851  | H                                          | 0.247545  | -2.314384 | 2.095372  |
| C                             | -0.000000 | -3.113740 | 0.121492  | C                                          | -0.000000 | -3.113978 | 0.118106  |
| H                             | 0.282099  | -4.135316 | 0.422255  | H                                          | 0.275294  | -4.138011 | 0.410546  |
| H                             | -0.779091 | -3.255756 | -0.639495 | H                                          | -0.780781 | -3.245097 | -0.643123 |
| C                             | 1.256560  | -2.491865 | -0.491433 | C                                          | 1.259453  | -2.491609 | -0.492011 |
| H                             | 1.674319  | -3.200434 | -1.234566 | H                                          | 1.678933  | -3.199538 | -1.232279 |
| H                             | 2.014158  | -2.400097 | 0.297295  | H                                          | 2.013623  | -2.396939 | 0.299893  |
| N                             | 1.106903  | -1.165907 | -1.128132 | N                                          | 1.108750  | -1.164614 | -1.128407 |
| C                             | 2.433495  | -0.569111 | -1.366884 | C                                          | 2.434886  | -0.565005 | -1.367459 |
| H                             | 2.317884  | 0.238910  | -2.099851 | H                                          | 2.314384  | 0.247545  | -2.095372 |
| H                             | 3.101090  | -1.316962 | -1.839330 | H                                          | 3.103350  | -1.308047 | -1.842218 |
| C                             | 3.113740  | -0.000000 | -0.121492 | C                                          | 3.113978  | -0.000000 | -0.118106 |
| H                             | 4.135316  | 0.282099  | -0.422255 | H                                          | 4.138011  | 0.275294  | -0.410546 |
| H                             | 3.255756  | -0.779091 | 0.639495  | H                                          | 3.245097  | -0.780781 | 0.643123  |
| C                             | 2.491865  | 1.256560  | 0.491433  | C                                          | 2.491609  | 1.259453  | 0.492011  |
| H                             | 3.200434  | 1.674319  | 1.234566  | H                                          | 3.199538  | 1.678933  | 1.232279  |
| H                             | 2.400097  | 2.014158  | -0.297295 | H                                          | 2.396939  | 2.013623  | -0.299893 |
| C                             | 1.291390  | 0.323514  | 2.368695  | C                                          | 1.291946  | 0.324231  | 2.368799  |
| H                             | 1.984829  | 0.829635  | 3.069723  | H                                          | 1.985534  | 0.827915  | 3.069481  |
| H                             | 1.782601  | -0.619119 | 2.096270  | H                                          | 1.780458  | -0.617715 | 2.092154  |
| C                             | 0.000000  | 0.000000  | 3.134857  | C                                          | 0.000000  | 0.000000  | 3.137165  |
| H                             | -0.254096 | 0.832404  | 3.807969  | H                                          | -0.253371 | 0.831247  | 3.810069  |
| H                             | 0.254096  | -0.832404 | 3.807969  | H                                          | 0.253371  | -0.831247 | 3.810069  |
| C                             | -1.291390 | -0.323514 | -2.368695 | C                                          | -1.291946 | -0.324231 | -2.368799 |
| H                             | -1.984829 | -0.829635 | 3.069723  | H                                          | -1.985534 | -0.827915 | 3.069481  |
| H                             | -1.782601 | 0.619119  | 2.096270  | H                                          | -1.780458 | 0.617715  | 2.092154  |
| C                             | -0.323514 | 1.291390  | -2.368695 | C                                          | -0.324231 | 1.291946  | -2.368799 |
| H                             | 0.619119  | 1.782601  | -2.096270 | H                                          | 0.617715  | 1.780458  | -2.092154 |
| H                             | -0.829635 | 1.984829  | -3.069723 | H                                          | -0.827915 | 1.985534  | -3.069481 |
| C                             | 0.000000  | 0.000000  | -3.134857 | C                                          | 0.000000  | 0.000000  | -3.137165 |
| H                             | 0.832404  | 0.254096  | -3.807969 | H                                          | 0.831247  | 0.253371  | -3.810069 |
| H                             | -0.832404 | -0.254096 | -3.807969 | H                                          | -0.831247 | -0.253371 | -3.810069 |
| C                             | 0.323514  | -1.291390 | -2.368695 | C                                          | 0.324231  | -1.291946 | -2.368799 |
| H                             | -0.619119 | -1.782601 | -2.096270 | H                                          | -0.617715 | -1.780458 | -2.092154 |
| H                             | 0.829635  | -1.984829 | -3.069723 | H                                          | 0.827915  | -1.985534 | -3.069481 |
| Li                            | 0.000000  | 0.000000  | 0.000000  | Li                                         | 0.000000  | 0.000000  | 0.000000  |



Table S7. Optimized geometries of K([10]aneN<sub>4</sub>)<sub>2</sub> and K[2.2.2]Cryptand species at CAM-B3LYP (M = K,N,C,O: cc-pVDZ and H: aug-cc-pVDZ) level of theory.

| K([10]aneN <sub>4</sub> ) <sub>2</sub> |           |           | Methylated-K[2.2.2]Cryptand |          |           | Ethylated-K[2.2.2]Cryptand |           |           |           |           |           |
|----------------------------------------|-----------|-----------|-----------------------------|----------|-----------|----------------------------|-----------|-----------|-----------|-----------|-----------|
| K                                      | 0.000000  | 0.000000  | 0.000000                    | 0.000000 | 0.000000  | K                          | -0.000675 | 0.217609  | -0.000129 |           |           |
| N                                      | 0.092855  | 2.131055  | 2.044653                    | O        | 2.208489  | -1.298791                  | 1.372353  | O         | 0.117489  | -2.548660 | -1.362012 |
| H                                      | 0.370004  | 2.925008  | 1.464440                    | O        | 2.229031  | -1.263212                  | -1.372353 | O         | -0.101267 | -2.550687 | 1.361654  |
| N                                      | 2.131055  | -0.092855 | 2.044653                    | O        | -2.208489 | -1.298791                  | -1.372353 | O         | -2.292185 | 1.273983  | 1.321174  |
| H                                      | 2.925008  | -0.370004 | 1.464440                    | C        | 0.845156  | 2.279440                   | 2.498159  | C         | 2.431102  | 0.713826  | -2.606084 |
| N                                      | -0.092855 | -2.131055 | 2.044653                    | O        | 0.020542  | 2.562003                   | 1.372353  | O         | 2.283496  | 1.289720  | -1.320897 |
| H                                      | -0.370004 | -2.925008 | 1.464440                    | O        | -0.020542 | 2.562003                   | -1.372353 | O         | 2.323432  | 1.189547  | 1.391674  |
| N                                      | -2.131055 | 0.092855  | 2.044653                    | N        | 0.000000  | 0.000000                   | -3.007697 | N         | -0.036256 | 0.050711  | 2.943972  |
| H                                      | -2.925008 | 0.370004  | 1.464440                    | N        | -0.000000 | 0.000000                   | 3.007697  | N         | 0.035502  | 0.053070  | -2.943546 |
| C                                      | 1.102502  | 1.930123  | 3.079195                    | C        | 0.845156  | 2.279440                   | 2.498159  | C         | 2.431102  | 0.713826  | -2.606084 |
| H                                      | 0.664322  | 1.308806  | 3.872122                    | H        | 1.125026  | 3.205479                   | 3.020701  | H         | 3.230668  | 1.218938  | -3.167810 |
| H                                      | 1.392658  | 2.879586  | 3.571427                    | H        | 1.781182  | 1.794742                   | 2.166302  | H         | 2.721391  | -0.349077 | -2.507469 |
| C                                      | 2.366353  | 1.256537  | 2.5252751                   | C        | 0.067204  | 1.394193                   | 3.448879  | C         | 1.147977  | 0.895735  | -3.387717 |
| H                                      | 2.772836  | 1.859290  | 1.725292                    | H        | 0.500116  | 1.466622                   | 4.466563  | H         | 1.356573  | 0.726485  | -4.651222 |
| H                                      | 3.128433  | 1.277964  | 3.358407                    | H        | -0.950221 | 1.802821                   | 3.508460  | H         | 0.857867  | 1.950310  | -3.282803 |
| C                                      | 1.930123  | -1.102502 | 3.079195                    | C        | 1.551475  | -1.871647                  | 2.498159  | C         | -0.547371 | -2.347435 | -2.600843 |
| H                                      | 1.308806  | -0.664322 | 3.872122                    | H        | 2.213513  | -2.577041                  | 3.020701  | H         | -0.576645 | -3.285092 | -3.178117 |
| H                                      | 2.879586  | -1.392658 | 3.571427                    | H        | 0.663701  | -2.439920                  | 2.166302  | H         | -1.592200 | -2.040647 | -2.413994 |
| C                                      | 1.256537  | -2.366353 | 2.5252751                   | C        | 1.173804  | -0.755297                  | 3.448879  | C         | 2.073556  | -1.318805 | -3.415184 |
| H                                      | 1.859290  | -2.772836 | 1.725292                    | H        | 1.020074  | -1.166424                  | 4.466563  | H         | -0.094377 | -1.408739 | -4.479509 |
| H                                      | 1.277964  | -3.128433 | 3.358407                    | H        | 2.036399  | -0.078495                  | 3.508460  | H         | 1.270247  | -1.586996 | -3.365477 |
| C                                      | -1.102502 | -1.930123 | 3.079195                    | C        | -2.396631 | -0.407793                  | 2.498159  | C         | -1.797528 | 1.721875  | -2.591820 |
| H                                      | -0.664322 | -1.308806 | 3.872122                    | H        | -3.338539 | -0.628438                  | 3.020701  | C         | -2.589467 | 2.218372  | -3.174563 |
| H                                      | -1.392658 | -2.879586 | 3.571427                    | H        | -2.444883 | 0.645178                   | 2.166302  | H         | -1.044813 | 2.494238  | -2.348807 |
| C                                      | -2.366353 | -1.256537 | 2.5252751                   | C        | -1.241008 | -0.638896                  | 3.448879  | C         | -1.232629 | 0.601277  | -3.434847 |
| H                                      | -2.772836 | -1.859290 | 1.725292                    | H        | -1.520190 | -0.300198                  | 4.466563  | H         | -1.119439 | 0.955438  | -4.479832 |
| H                                      | -3.128433 | -1.277964 | 3.358407                    | H        | -1.086178 | -1.724326                  | 3.508460  | H         | -1.984016 | -0.199229 | -3.451226 |
| C                                      | -1.930123 | 1.102502  | 3.079195                    | C        | 0.380568  | 3.749450                   | 0.661333  | C         | 3.520142  | 1.548396  | -0.653952 |
| H                                      | -1.308806 | 0.664322  | 3.872122                    | H        | 1.460888  | 3.706581                   | 0.431123  | H         | 4.050069  | 0.582343  | -0.524314 |
| H                                      | -2.879586 | 1.392658  | 3.571427                    | C        | -0.380568 | 3.749450                   | -0.661333 | C         | 3.202412  | 2.103615  | 0.727492  |
| C                                      | -1.256537 | 2.366353  | 2.5252751                   | H        | -1.460888 | 3.706581                   | -0.431123 | H         | 2.664053  | 3.060749  | 0.591601  |
| H                                      | -1.859290 | 2.772836  | 1.725292                    | C        | 3.056834  | -2.204307                  | 0.661333  | C         | -0.289372 | -3.743470 | -0.700111 |
| H                                      | -1.277964 | 3.128433  | 3.358407                    | H        | 2.478549  | -3.118456                  | 0.431123  | H         | -1.391189 | -3.723808 | 0.591343  |
| N                                      | -0.092855 | -2.131055 | -2.044653                   | C        | 3.437403  | -1.545143                  | -0.661333 | C         | 0.314003  | -3.741954 | 0.696468  |
| O                                      | -0.370004 | -2.925008 | -1.464440                   | H        | 3.940437  | -0.588125                  | -0.431123 | H         | 1.415648  | -3.714510 | 0.598687  |
| N                                      | -2.131055 | 0.092855  | -2.044653                   | C        | -3.437403 | -1.545143                  | 0.661333  | C         | -3.216050 | 2.084366  | -0.726442 |
| H                                      | -2.925008 | 0.370004  | -1.464440                   | H        | -3.940437 | -0.588125                  | 0.431123  | H         | -2.682709 | 3.044218  | -0.589589 |
| N                                      | 0.092855  | 2.131055  | -2.044653                   | C        | -3.056834 | -2.204307                  | -0.661333 | C         | -3.530436 | 1.526120  | 0.654739  |
| H                                      | 0.370004  | 2.925008  | -1.464440                   | H        | -2.479549 | -3.118456                  | -0.431123 | H         | -4.054799 | 0.557157  | 0.524266  |
| N                                      | 2.131055  | -0.092855 | -2.044653                   | C        | 2.396631  | -0.407793                  | -2.498159 | C         | 0.563078  | -2.345389 | 2.600087  |
| H                                      | 2.925008  | -0.370004 | -1.464440                   | H        | 3.338539  | -0.628438                  | -3.020701 | H         | 0.599487  | -3.283138 | 3.176820  |
| C                                      | 1.102502  | -1.930123 | -3.079195                   | H        | 2.444883  | 0.645178                   | -2.166302 | H         | 1.605539  | -2.031000 | 2.416250  |
| H                                      | 0.664322  | -1.308806 | -3.872122                   | C        | 1.241008  | -0.638896                  | -3.448879 | C         | -0.198362 | -1.322446 | 3.415324  |
| H                                      | 1.392658  | -2.879586 | -3.571427                   | H        | 1.520190  | -0.300198                  | -4.466563 | H         | 0.104545  | -1.410647 | 4.479447  |
| C                                      | -2.366353 | -1.256537 | -2.5252751                  | H        | 1.086178  | -1.724326                  | -3.508460 | H         | -1.259400 | -1.597766 | 3.366076  |
| H                                      | -2.772836 | -1.859290 | -1.725292                   | C        | -0.845156 | 2.279440                   | -2.498159 | H         | 1.786047  | 1.732297  | 2.592232  |
| H                                      | -3.128433 | -1.277964 | -3.358407                   | H        | -1.125026 | 3.205479                   | -3.020701 | H         | 2.573676  | 2.234149  | 3.174830  |
| C                                      | -1.930123 | 1.102502  | -3.079195                   | H        | -1.781182 | 1.794742                   | -2.166302 | H         | 1.027112  | 2.499598  | 2.349313  |
| H                                      | -1.308806 | 0.664322  | -3.872122                   | C        | -0.067204 | 1.394193                   | -3.448879 | C         | 1.227899  | 0.607922  | 3.435392  |
| H                                      | -2.879586 | 1.392658  | -3.571427                   | H        | -0.500116 | 1.466622                   | -4.466563 | H         | 1.112056  | 0.961525  | 4.480274  |
| C                                      | -1.256537 | 2.366353  | -2.5252751                  | H        | 0.950221  | 1.802821                   | -3.508460 | H         | 1.984870  | -0.187308 | 3.452064  |
| H                                      | -1.859290 | 2.772836  | -1.725292                   | C        | -1.551475 | -1.871647                  | -2.498159 | C         | -2.436132 | 0.694875  | 2.605377  |
| H                                      | -1.277964 | 3.128433  | -3.358407                   | H        | -2.213513 | -2.577041                  | -3.020701 | H         | -3.240014 | 1.192843  | 3.167341  |
| C                                      | 1.102502  | 1.930123  | -3.079195                   | H        | -0.663701 | -2.439920                  | -2.166302 | H         | -2.718064 | -0.370092 | 2.504869  |
| H                                      | 0.664322  | 1.308806  | -3.872122                   | C        | -1.173804 | -0.755297                  | -3.448879 | C         | -1.154839 | 0.885330  | 3.380803  |
| H                                      | 1.392658  | 2.879586  | -3.571427                   | H        | -1.020074 | -1.166424                  | -4.466563 | H         | -1.362841 | 0.713973  | 4.465213  |
| C                                      | 2.366353  | 1.256537  | -2.5252751                  | H        | -2.036399 | -0.078495                  | -3.508460 | H         | -0.872018 | 1.941948  | 3.283948  |
| H                                      | 2.772836  | 1.859290  | -1.725292                   | C        | 0.059876  | 4.989840                   | 1.476460  | C         | 4.406429  | 2.536587  | -1.442726 |
| H                                      | 3.128433  | 1.277964  | -3.358407                   | H        | 0.500426  | 4.954722                   | 2.479161  | C         | 5.674524  | 1.925548  | -2.031538 |
| C                                      | 1.930123  | -1.102502 | -3.079195                   | H        | -1.027626 | 5.115222                   | 1.590829  | H         | 3.787012  | 2.987441  | -2.208817 |
| H                                      | 1.308806  | -0.664322 | -3.872122                   | H        | 0.459912  | 5.900079                   | 0.997014  | H         | 4.681740  | 3.380120  | -0.797202 |
| H                                      | 2.879586  | -1.392658 | -3.571427                   | C        | -0.059876 | 4.989840                   | -1.476460 | H         | 6.248002  | 2.671629  | -2.598549 |
| C                                      | 1.256537  | -2.366353 | -2.5252751                  | H        | -0.500426 | 4.954722                   | -2.479161 | H         | 5.452521  | 1.088358  | -2.709532 |
| H                                      | 1.859290  | -2.772836 | -1.725292                   | H        | 1.027626  | 5.115222                   | -1.590829 | H         | 6.352296  | 1.533127  | -1.241666 |
| H                                      | 1.277964  | -3.128433 | -3.358407                   | H        | -4.859912 | 5.900079                   | -0.997014 | C         | 4.496683  | 2.243389  | 1.543483  |
|                                        |           |           |                             | C        | -4.299271 | -2.551324                  | -1.476460 | C         | 4.711808  | 3.758820  | 2.018582  |
|                                        |           |           |                             | H        | -4.040702 | -2.910743                  | -2.479161 | H         | 4.464696  | 1.641122  | 2.403835  |
|                                        |           |           |                             | H        | -4.943726 | -1.667661                  | -1.590829 | H         | 5.367019  | 1.997905  | 0.955739  |
|                                        |           |           |                             | H        | -4.879662 | -3.348335                  | -0.997014 | H         | 5.630003  | 3.847082  | 2.616085  |
|                                        |           |           |                             | C        | -4.359147 | -2.447615                  | 1.476460  | H         | 3.871669  | 4.112796  | 2.633125  |
|                                        |           |           |                             | H        | -3.916099 | -3.447562                  | 1.590829  | H         | 4.795631  | 4.457186  | 1.173374  |
|                                        |           |           |                             | H        | -5.339574 | -2.551744                  | 0.997014  | C         | -4.422215 | 2.508422  | 1.444703  |
|                                        |           |           |                             | C        | 4.359147  | -2.447615                  | -1.476460 | C         | -5.687857 | 1.890848  | 2.031124  |
|                                        |           |           |                             | H        | 4.541128  | -2.043979                  | -2.479161 | H         | -3.805787 | 2.960490  | 2.234409  |
|                                        |           |           |                             | H        | 3.916099  | -3.447562                  | -1.590829 | H         | -4.700884 | 3.352055  | 0.800716  |
|                                        |           |           |                             | H        | 5.339574  | -2.551744                  | -0.997014 | H         | -6.265472 | 2.632178  | 2.599112  |
|                                        |           |           |                             | C        | 4.299271  | -2.551324                  | 1.476460  | H         | -5.462291 | 1.052617  | 2.707662  |
|                                        |           |           |                             | H        | 4.040702  | -2.910743                  | 2.479161  | H         | -6.343044 | 1.495945  | 1.239940  |
|                                        |           |           |                             | H        | 4.943726  | -1.667661                  | 1.590829  | C         | -4.511675 | 2.298964  | -1.541701 |
|                                        |           |           |                             | H        | 4.879662  | -3.348335                  | 0.997014  | C         | -4.734052 | 3.732426  | -2.016359 |
|                                        |           |           |                             | H        | -4.541128 | -2.043979                  | 2.479161  | H         | -4.476703 | 1.616004  | -2.402188 |
|                                        |           |           |                             |          |           |                            | H         | -5.380141 | 1.968122  | -0.953660 |           |
|                                        |           |           |                             |          |           |                            | H         | -6.652910 | 3.816327  | -2.613468 |           |
|                                        |           |           |                             |          |           |                            | H         | -3.895922 | 4.090698  | -2.631146 |           |
|                                        |           |           |                             |          |           |                            | H         | -4.820967 | 4.430120  | -1.170909 |           |
|                                        |           |           |                             |          |           |                            | C         | -0.105345 | -5.004399 | 1.487328  |           |
|                                        |           |           |                             |          |           |                            | C         | 1.055863  | -5.654933 | 1.994754  |           |
|                                        |           |           |                             |          |           |                            | H         | -0.729369 | -4.675891 | 2.328591  |           |
|                                        |           |           |                             |          |           |                            | H         | -0.767933 | -5.626325 | 0.870275  |           |
|                                        |           |           |                             |          |           |                            | H         | 0.695296  | -6.719483 | 2.568793  |           |
|                                        |           |           |                             |          |           |                            | H         | 1.727489  | -5.276884 | 2.645918  |           |
|                                        |           |           |                             |          |           |                            | H         | 1.666423  | -6.241074 | 1.165512  |           |
|                                        |           |           |                             |          |           |                            | C         | 0.138891  | -5.002267 | -1.489792 |           |
|                                        |           |           |                             |          |           |                            | C         | -1.016280 | -5.860343 | -1.998309 |           |
|                                        |           |           |                             |          |           |                            | H         | 0.760962  | -6.668780 | -2.331536 |           |
|                                        |           |           |                             |          |           |                            | H         | 0.805505  | -5.620196 | -0.873084 |           |
|                                        |           |           |                             |          |           |                            | H         | -0.649600 | -6.721805 | -2.573110 |           |
|                                        |           |           |                             |          |           |                            | H         | -1.691818 | -5.286373 | -2.649034 |           |
|                                        |           |           |                             |          |           |                            | H         | -1.624267 | -6.251538 | -1.169538 |           |

Table S8. Harmonic vibrational frequencies of [M(9-Crown-3)<sub>2</sub>]<sup>0/+</sup> and [M[2.1.1]Cryptand]<sup>0/+</sup> species at B3LYP level (M=Li/Na,C,O: cc-pVTZ and H: aug-cc-pVTZ). B3LYP optimized geometries were used for frequency calculations.

| Li(9-Crown-3) <sub>2</sub><br>(S <sub>6</sub> ) | Li(9-Crown-3) <sub>2</sub> <sup>+</sup><br>(S <sub>6</sub> ) | Na(9-Crown-3) <sub>2</sub><br>(S <sub>6</sub> ) | Na(9-Crown-3) <sub>2</sub> <sup>+</sup><br>(S <sub>6</sub> ) | Li[2.1.1]Cryptand<br>(C <sub>1</sub> ) | [Li[2.1.1]Cryptand] <sup>+</sup><br>(C <sub>2</sub> ) | Na[2.1.1]Cryptand<br>(C <sub>2</sub> ) | [Na[2.1.1]Cryptand] <sup>+</sup><br>(C <sub>2</sub> ) |
|-------------------------------------------------|--------------------------------------------------------------|-------------------------------------------------|--------------------------------------------------------------|----------------------------------------|-------------------------------------------------------|----------------------------------------|-------------------------------------------------------|
| 47.0                                            | 45.7                                                         | -5.0                                            | 14.5                                                         | 38.6                                   | -49.2                                                 | -5.6                                   | 48.7                                                  |
| 75.6                                            | 74.6                                                         | -4.3                                            | 14.5                                                         | 57.7                                   | 44.6                                                  | 25.1                                   | 71.5                                                  |
| 75.6                                            | 74.6                                                         | 27.0                                            | 26.9                                                         | 64.9                                   | 69.4                                                  | 37.5                                   | 122.2                                                 |
| 103.0                                           | 100.8                                                        | 78.6                                            | 78.7                                                         | 93.1                                   | 88.1                                                  | 44.3                                   | 124.9                                                 |
| 103.0                                           | 100.8                                                        | 92.6                                            | 92.1                                                         | 105.0                                  | 112.0                                                 | 56.6                                   | 140.6                                                 |
| 109.9                                           | 106.5                                                        | 92.6                                            | 92.1                                                         | 136.3                                  | 116.8                                                 | 63.8                                   | 143.3                                                 |
| 169.7                                           | 177.8                                                        | 167.7                                           | 172.4                                                        | 145.7                                  | 142.9                                                 | 82.8                                   | 149.5                                                 |
| 169.7                                           | 177.8                                                        | 167.8                                           | 172.4                                                        | 156.1                                  | 159.1                                                 | 87.9                                   | 157.4                                                 |
| 175.6                                           | 179.2                                                        | 172.3                                           | 177.7                                                        | 166.7                                  | 168.0                                                 | 92.7                                   | 171.1                                                 |
| 175.6                                           | 179.2                                                        | 172.3                                           | 177.7                                                        | 204.7                                  | 208.6                                                 | 102.0                                  | 177.0                                                 |
| 226.2                                           | 227.8                                                        | 173.3                                           | 184.2                                                        | 211.6                                  | 218.2                                                 | 118.4                                  | 204.9                                                 |
| 226.2                                           | 227.8                                                        | 173.4                                           | 184.2                                                        | 221.1                                  | 226.3                                                 | 127.3                                  | 224.5                                                 |
| 228.2                                           | 229.1                                                        | 211.4                                           | 214.2                                                        | 233.1                                  | 242.4                                                 | 145.8                                  | 232.1                                                 |
| 228.2                                           | 229.1                                                        | 211.4                                           | 214.2                                                        | 243.7                                  | 252.2                                                 | 158.2                                  | 243.7                                                 |
| 273.9                                           | 285.2                                                        | 219.3                                           | 221.5                                                        | 267.6                                  | 270.1                                                 | 163.0                                  | 248.0                                                 |
| 275.5                                           | 286.3                                                        | 219.4                                           | 221.5                                                        | 271.6                                  | 277.8                                                 | 169.5                                  | 270.5                                                 |
| 328.7                                           | 328.3                                                        | 248.7                                           | 254.1                                                        | 279.8                                  | 296.2                                                 | 181.1                                  | 282.5                                                 |
| 328.7                                           | 328.3                                                        | 271.8                                           | 285.2                                                        | 295.5                                  | 300.4                                                 | 190.7                                  | 288.8                                                 |
| 353.1                                           | 356.0                                                        | 272.7                                           | 285.5                                                        | 313.2                                  | 310.4                                                 | 209.9                                  | 293.3                                                 |
| 360.3                                           | 362.6                                                        | 336.9                                           | 343.1                                                        | 340.1                                  | 329.2                                                 | 246.4                                  | 299.4                                                 |
| 365.1                                           | 364.6                                                        | 342.0                                           | 345.5                                                        | 345.3                                  | 344.6                                                 | 252.7                                  | 325.7                                                 |
| 380.5                                           | 384.2                                                        | 377.3                                           | 384.3                                                        | 351.8                                  | 351.9                                                 | 270.5                                  | 342.6                                                 |
| 391.4                                           | 392.6                                                        | 379.8                                           | 385.8                                                        | 364.7                                  | 367.6                                                 | 276.6                                  | 351.2                                                 |
| 391.4                                           | 392.6                                                        | 385.3                                           | 387.7                                                        | 375.5                                  | 383.0                                                 | 288.3                                  | 364.4                                                 |
| 393.0                                           | 394.5                                                        | 385.3                                           | 387.7                                                        | 382.5                                  | 384.0                                                 | 288.6                                  | 376.8                                                 |
| 393.0                                           | 394.5                                                        | 386.5                                           | 389.0                                                        | 389.6                                  | 386.3                                                 | 325.1                                  | 378.9                                                 |
| 413.1                                           | 431.2                                                        | 386.5                                           | 389.0                                                        | 395.1                                  | 386.4                                                 | 337.2                                  | 386.5                                                 |
| 542.8                                           | 543.3                                                        | 537.2                                           | 541.3                                                        | 410.4                                  | 404.4                                                 | 348.1                                  | 400.1                                                 |
| 542.8                                           | 543.3                                                        | 537.2                                           | 541.3                                                        | 421.6                                  | 418.2                                                 | 352.2                                  | 409.7                                                 |
| 543.5                                           | 546.9                                                        | 539.6                                           | 542.4                                                        | 515.4                                  | 515.1                                                 | 375.0                                  | 514.1                                                 |
| 543.5                                           | 546.9                                                        | 539.6                                           | 542.4                                                        | 521.1                                  | 532.0                                                 | 376.9                                  | 533.6                                                 |
| 606.4                                           | 605.9                                                        | 597.7                                           | 598.4                                                        | 598.8                                  | 597.6                                                 | 438.2                                  | 606.4                                                 |
| 608.1                                           | 607.5                                                        | 597.9                                           | 598.5                                                        | 567.0                                  | 569.5                                                 | 442.6                                  | 548.4                                                 |
| 796.4                                           | 797.2                                                        | 796.8                                           | 798.6                                                        | 584.7                                  | 570.6                                                 | 496.7                                  | 552.9                                                 |
| 796.4                                           | 797.2                                                        | 796.8                                           | 798.6                                                        | 600.0                                  | 598.0                                                 | 497.0                                  | 582.7                                                 |
| 798.6                                           | 799.6                                                        | 797.1                                           | 799.5                                                        | 609.7                                  | 600.3                                                 | 530.0                                  | 593.3                                                 |
| 798.6                                           | 799.6                                                        | 797.1                                           | 799.5                                                        | 735.2                                  | 736.2                                                 | 548.8                                  | 730.2                                                 |
| 829.5                                           | 831.8                                                        | 818.6                                           | 821.3                                                        | 740.4                                  | 737.0                                                 | 580.4                                  | 732.5                                                 |
| 834.8                                           | 836.0                                                        | 820.5                                           | 824.5                                                        | 802.7                                  | 804.6                                                 | 596.9                                  | 796.7                                                 |
| 889.8                                           | 891.3                                                        | 889.5                                           | 891.6                                                        | 811.8                                  | 809.0                                                 | 735.9                                  | 805.2                                                 |
| 891.3                                           | 892.0                                                        | 890.5                                           | 891.8                                                        | 817.3                                  | 811.7                                                 | 740.7                                  | 820.9                                                 |
| 899.5                                           | 900.2                                                        | 891.5                                           | 892.6                                                        | 849.0                                  | 844.1                                                 | 809.8                                  | 831.8                                                 |
| 899.5                                           | 900.2                                                        | 891.5                                           | 892.6                                                        | 898.5                                  | 898.7                                                 | 818.0                                  | 888.0                                                 |
| 900.5                                           | 900.8                                                        | 892.0                                           | 892.8                                                        | 903.0                                  | 904.3                                                 | 834.5                                  | 902.8                                                 |
| 900.5                                           | 900.8                                                        | 892.0                                           | 892.8                                                        | 914.1                                  | 913.7                                                 | 845.9                                  | 903.2                                                 |
| 1005.1                                          | 1008.1                                                       | 1008.5                                          | 1009.0                                                       | 917.0                                  | 919.1                                                 | 852.2                                  | 906.7                                                 |
| 1008.3                                          | 1008.1                                                       | 1008.5                                          | 1009.0                                                       | 929.6                                  | 933.1                                                 | 880.0                                  | 918.3                                                 |
| 1008.3                                          | 1010.0                                                       | 1009.6                                          | 1010.2                                                       | 938.7                                  | 936.6                                                 | 882.9                                  | 921.7                                                 |
| 1010.4                                          | 1010.0                                                       | 1009.6                                          | 1010.2                                                       | 943.3                                  | 943.0                                                 | 903.0                                  | 934.3                                                 |
| 1010.4                                          | 1012.2                                                       | 1010.6                                          | 1015.9                                                       | 945.5                                  | 956.8                                                 | 914.6                                  | 940.1                                                 |
| 1015.1                                          | 1014.5                                                       | 1017.4                                          | 1017.9                                                       | 1018.4                                 | 1019.3                                                | 915.6                                  | 1015.5                                                |
| 1049.8                                          | 1051.2                                                       | 1054.6                                          | 1056.7                                                       | 1019.6                                 | 1021.1                                                | 931.2                                  | 1016.8                                                |
| 1050.0                                          | 1051.5                                                       | 1055.1                                          | 1056.7                                                       | 1030.3                                 | 1030.1                                                | 989.1                                  | 1023.8                                                |
| 1093.7                                          | 1105.0                                                       | 1097.5                                          | 1112.2                                                       | 1039.5                                 | 1038.0                                                | 994.7                                  | 1029.5                                                |
| 1093.7                                          | 1105.0                                                       | 1097.5                                          | 1112.2                                                       | 1049.4                                 | 1049.1                                                | 1000.1                                 | 1050.1                                                |
| 1099.4                                          | 1108.7                                                       | 1105.7                                          | 1114.9                                                       | 1056.7                                 | 1058.8                                                | 1002.9                                 | 1054.0                                                |
| 1099.4                                          | 1108.7                                                       | 1105.7                                          | 1114.9                                                       | 1065.8                                 | 1061.9                                                | 1032.8                                 | 1061.5                                                |
| 1136.0                                          | 1135.6                                                       | 1136.0                                          | 1136.2                                                       | 1070.9                                 | 1072.4                                                | 1034.5                                 | 1068.9                                                |
| 1136.9                                          | 1136.6                                                       | 1136.3                                          | 1136.6                                                       | 1074.7                                 | 1076.7                                                | 1043.6                                 | 1068.9                                                |
| 1175.8                                          | 1176.5                                                       | 1174.4                                          | 1176.5                                                       | 1078.2                                 | 1084.8                                                | 1047.5                                 | 1074.8                                                |
| 1175.8                                          | 1176.5                                                       | 1174.4                                          | 1176.5                                                       | 1088.1                                 | 1085.6                                                | 1062.9                                 | 1074.8                                                |
| 1177.1                                          | 1177.6                                                       | 1177.5                                          | 1177.0                                                       | 1096.7                                 | 1095.7                                                | 1069.4                                 | 1098.7                                                |
| 1177.1                                          | 1177.6                                                       | 1177.5                                          | 1177.0                                                       | 1100.1                                 | 1103.7                                                | 1074.5                                 | 1105.7                                                |
| 1269.2                                          | 1271.6                                                       | 1272.8                                          | 1275.5                                                       | 1112.6                                 | 1116.2                                                | 1078.9                                 | 1113.3                                                |
| 1270.0                                          | 1271.8                                                       | 1273.1                                          | 1275.7                                                       | 1114.5                                 | 1120.6                                                | 1099.4                                 | 1115.4                                                |
| 1281.3                                          | 1283.0                                                       | 1286.1                                          | 1288.4                                                       | 1138.4                                 | 1133.5                                                | 1110.8                                 | 1119.7                                                |
| 1281.3                                          | 1283.0                                                       | 1286.1                                          | 1288.4                                                       | 1141.1                                 | 1139.7                                                | 1123.9                                 | 1141.3                                                |
| 1281.4                                          | 1283.3                                                       | 1286.3                                          | 1288.4                                                       | 1188.6                                 | 1190.3                                                | 1125.2                                 | 1184.4                                                |
| 1281.4                                          | 1283.3                                                       | 1286.3                                          | 1288.4                                                       | 1280.4                                 | 1281.3                                                | 1125.6                                 | 1186.0                                                |
| 1293.5                                          | 1293.2                                                       | 1291.5                                          | 1292.4                                                       | 1196.6                                 | 1199.4                                                | 1139.6                                 | 1189.4                                                |
| 1293.5                                          | 1293.2                                                       | 1291.5                                          | 1292.4                                                       | 1206.4                                 | 1208.1                                                | 1142.6                                 | 1200.8                                                |
| 1293.6                                          | 1293.4                                                       | 1292.4                                          | 1293.2                                                       | 1257.1                                 | 1256.0                                                | 1188.6                                 | 1254.5                                                |
| 1316.3                                          | 1318.4                                                       | 1315.5                                          | 1318.7                                                       | 1264.6                                 | 1265.1                                                | 1194.6                                 | 1266.2                                                |
| 1317.8                                          | 1317.8                                                       | 1317.6                                          | 1319.0                                                       | 1271.4                                 | 1271.3                                                | 1212.1                                 | 1266.3                                                |
| 1386.3                                          | 1387.6                                                       | 1384.9                                          | 1385.8                                                       | 1275.7                                 | 1277.6                                                | 1218.5                                 | 1272.7                                                |
| 1386.3                                          | 1387.6                                                       | 1384.9                                          | 1385.8                                                       | 1280.8                                 | 1282.5                                                | 1222.0                                 | 1277.4                                                |
| 1389.1                                          | 1388.7                                                       | 1386.7                                          | 1386.5                                                       | 1282.2                                 | 1291.1                                                | 1237.6                                 | 1282.5                                                |
| 1408.1                                          | 1407.9                                                       | 1405.7                                          | 1406.9                                                       | 1291.4                                 | 1295.4                                                | 1238.4                                 | 1294.8                                                |
| 1408.1                                          | 1407.9                                                       | 1405.7                                          | 1406.9                                                       | 1300.8                                 | 1303.4                                                | 1259.0                                 | 1306.6                                                |
| 1409.0                                          | 1410.0                                                       | 1408.2                                          | 1408.4                                                       | 1304.0                                 | 1305.9                                                | 1260.6                                 | 1309.4                                                |
| 1409.6                                          | 1410.6                                                       | 1408.2                                          | 1408.4                                                       | 1307.4                                 | 1308.4                                                | 1272.1                                 | 1312.9                                                |
| 1410.9                                          | 1410.7                                                       | 1409.1                                          | 1409.2                                                       | 1309.5                                 | 1313.8                                                | 1279.4                                 | 1316.0                                                |
| 1410.9                                          | 1410.7                                                       | 1409.1                                          | 1409.2                                                       | 1315.9                                 | 1314.1                                                | 1283.4                                 | 1321.1                                                |
| 1421.7                                          | 1423.0                                                       | 1420.0                                          | 1421.8                                                       | 1318.3                                 | 1318.7                                                | 1296.5                                 | 1322.4                                                |
| 1421.7                                          | 1423.0                                                       | 1420.0                                          | 1421.8                                                       | 1326.2                                 | 1329.5                                                | 1302.4                                 | 1332.0                                                |
| 1422.2                                          | 1424.0                                                       | 1421.0                                          | 1421.8                                                       | 1379.8                                 | 1380.5                                                | 1314.2                                 | 1375.0                                                |
| 1422.2                                          | 1424.0                                                       | 1421.0                                          | 1421.8                                                       | 1385.7                                 | 1386.2                                                | 1329.1                                 | 1387.3                                                |
| 1490.1                                          | 1497.2                                                       | 1492.4                                          | 1499.2                                                       | 1394.4                                 | 1395.4                                                | 1337.5                                 | 1387.9                                                |
| 1491.7                                          | 1497.2                                                       | 1492.4                                          | 1499.2                                                       | 1397.4                                 | 1397.0                                                | 1342.8                                 | 1395.7                                                |
| 1491.7                                          | 1497.2                                                       | 1492.4                                          | 1499.2                                                       | 1407.7                                 | 1406.7                                                | 1357.4                                 | 1404.1                                                |
| 1492.0                                          | 1497.3                                                       | 1492.4                                          | 1492.4                                                       | 1413.6                                 | 1413.6                                                | 1365.2                                 | 1407.5                                                |
| 1492.0                                          | 1499.0                                                       | 1493.2                                          | 1503.1                                                       | 1414.6                                 | 1416.0                                                | 1371.3                                 | 1414.2                                                |
| 1496.5                                          | 1500.8                                                       | 1497.1                                          | 1503.3                                                       | 1416.5                                 | 1417.3                                                | 1375.2                                 | 1414.5                                                |
| 1499.3                                          | 1506.1                                                       | 1498.6                                          | 1504.8                                                       | 1419.2                                 | 1419.0                                                | 1384.2                                 | 1417.7                                                |
| 1499.3                                          | 1506.1                                                       | 1498.6                                          | 1504.8                                                       | 1424.5                                 | 1424.2                                                | 1396.4                                 | 1420.7                                                |
| 1500.5                                          | 1506.9                                                       | 1499.2                                          | 1505.6                                                       | 1426.3                                 | 1431.0                                                | 1400.9                                 | 1427.9                                                |
| 1500.5                                          | 1506.9                                                       | 1499.2                                          | 1505.6                                                       | 1434.2                                 | 1431.3                                                | 1402.2                                 | 1428.0                                                |
| 1525.4                                          | 1527.7                                                       | 1523.3                                          | 1531.7                                                       | 1434.7                                 | 1434.8                                                | 1412.5                                 | 1433.4                                                |
| 1525.7                                          | 1533.1                                                       | 1523.8                                          | 1531.9                                                       | 1447.3                                 | 1446.1                                                | 1418.3                                 | 1446.9                                                |
| 3006.1                                          | 3033.9                                                       | 2999.3                                          | 3024.5                                                       | 1487.8                                 | 1493.6                                                | 1419.4                                 | 1487.5                                                |
| 3006.1                                          | 3033.9                                                       | 2999.4                                          | 3024.5                                                       | 1488.7                                 | 1493.7                                                | 1421.2                                 | 1487.9                                                |
| 3006.6                                          | 3034.1                                                       | 2999.6                                          | 3025.2                                                       | 1489.7                                 | 1494.9                                                | 1419.0                                 | 1491.9                                                |
| 3006.6                                          | 3034.1                                                       | 2999.6                                          | 3025.2                                                       | 1492.0                                 | 1492.0                                                | 1447.7                                 | 1492.4                                                |
| 3007.7                                          | 3034.1                                                       | 3000.0                                          | 3025.2                                                       | 1492.9                                 | 1495.9                                                | 1447.9                                 | 1493.6                                                |
| 3007.9                                          | 3034.1                                                       | 3000.0                                          | 3025.2                                                       | 1493.9                                 | 1497.7                                                | 1458.2                                 | 1495.3                                                |
| 3019.8                                          | 3040.9                                                       | 3008.0                                          | 3034.7                                                       | 1499.7                                 | 1510.0                                                | 1459.7                                 | 1502.4                                                |
| 3019.8                                          | 3040.9                                                       | 3008.0                                          | 3034.7                                                       | 1504.5                                 | 1511.1                                                | 1467.8                                 | 1503.1                                                |
| 3020.1                                          | 3041.1                                                       | 3008.4                                          | 3034.7                                                       | 1505.4                                 | 1467.9                                                | 1467.9                                 | 1503.8                                                |
| 3020.1                                          | 3041.1                                                       | 3008.4                                          | 3034.7                                                       | 1507.6                                 | 1512.8                                                | 1473.5                                 | 1504.2                                                |
| 3022.5                                          | 3046.1                                                       | 3010.7                                          | 3040.0                                                       | 1511.9                                 | 1517.1                                                | 1474.3                                 | 1516.9                                                |
| 3022.6                                          | 3047.3                                                       | 3011.5                                          | 3040.7                                                       | 1514.2                                 | 1518.8                                                | 1487.1                                 | 1521.8                                                |
| 3044.3                                          | 3071.8                                                       | 3046.5                                          | 3068.0                                                       | 1521.2                                 | 1520.3                                                | 1496.0                                 | 1522.2                                                |
| 3044.3                                          | 3071.8                                                       | 3046.5                                          | 3068.0                                                       | 1524.0                                 | 1526.4                                                | 1677.8                                 | 1525.7                                                |
| 3044.4                                          | 3071.9                                                       | 3046.6                                          | 3068.1                                                       | 2939.4                                 | 2962.5                                                | 2806.3                                 | 2965.1                                                |
| 3044.4                                          | 3071.9                                                       | 3046.6                                          | 3068.1                                                       | 2944.8                                 | 2962.7                                                | 2812.8                                 | 2965.3                                                |
| 3050.3                                          | 3080.8                                                       | 3052.7                                          | 3075.3                                                       | 2948.8                                 | 2969.5                                                | 2883.1                                 | 2971.6                                                |
| 3054.6                                          | 3080.8                                                       | 3057.5                                          | 3075.3                                                       | 2952.9                                 | 2969.8                                                | 2886.0                                 | 2971.8                                                |
| 3101.6                                          | 3114.1                                                       | 3076.4                                          | 3093.4                                                       | 2964.5                                 | 2981.4                                                | 2916.4                                 | 2978.8                                                |
| 3101.6                                          | 3114.1                                                       | 3076.4                                          | 3093.4                                                       | 2965.0                                 | 2981.6                                                | 2916.7                                 | 2979.0                                                |
| 3102.1                                          | 3114.2                                                       | 3076.5                                          | 3093.8                                                       | 2973.4                                 | 3000.2                                                | 2926.6                                 | 2998.1                                                |
| 3102.1                                          | 3114.2                                                       | 3076.5                                          | 3093.8                                                       | 2976.8                                 | 3000.8                                                | 2928.1                                 | 2998.1                                                |
| 3102.2                                          | 3115.8                                                       | 3077.6                                          | 3098.4                                                       | 2978.1                                 | 3005.0                                                | 2983.2                                 | 3004.0                                                |
| 3102.2                                          | 3115.9                                                       | 3078.1                                          | 3098.8                                                       | 2988.5                                 | 3007.1                                                | 2983.5                                 | 3004.3                                                |
|                                                 |                                                              |                                                 |                                                              | 2996.3                                 | 3037.3                                                | 2985.1                                 | 3007.0                                                |



|  |  |  |  |        |        |        |        |
|--|--|--|--|--------|--------|--------|--------|
|  |  |  |  | 3007.0 | 3037.9 | 2986.3 | 3007.8 |
|  |  |  |  | 3011.6 | 3039.0 | 3009.5 | 3032.0 |
|  |  |  |  | 3015.4 | 3039.1 | 3010.3 | 3032.5 |
|  |  |  |  | 3020.1 | 3039.6 | 3020.0 | 3035.9 |
|  |  |  |  | 3020.6 | 3040.1 | 3020.2 | 3035.9 |
|  |  |  |  | 3024.0 | 3048.1 | 3059.2 | 3035.9 |
|  |  |  |  | 3026.2 | 3058.3 | 3059.3 | 3036.3 |
|  |  |  |  | 3033.2 | 3068.5 | 3071.7 | 3046.8 |
|  |  |  |  | 3051.7 | 3068.6 | 3073.3 | 3052.5 |
|  |  |  |  | 3055.5 | 3072.9 | 3088.9 | 3074.9 |
|  |  |  |  | 3063.7 | 3073.6 | 3096.4 | 3075.4 |
|  |  |  |  | 3066.6 | 3086.5 | 3096.5 | 3084.9 |
|  |  |  |  | 3074.7 | 3086.7 | 3096.8 | 3084.9 |
|  |  |  |  | 3082.9 | 3095.2 | 3098.1 | 3089.7 |
|  |  |  |  | 3085.8 | 3095.9 | 3106.1 | 3090.0 |
|  |  |  |  | 3088.1 | 3101.0 | 3185.2 | 3096.2 |
|  |  |  |  | 3100.5 | 3101.2 | 3212.4 | 3097.0 |

Table S9. Harmonic vibrational frequencies of M(*o*-Me<sub>2</sub>-1.1.1)<sup>0/+</sup>, M[24-Crown-8]<sup>0/+</sup>, and Li(3<sup>6</sup>Adamanzane)<sup>0/+</sup> species at B3LYP level (M=Li/Na/K,C,O,N: cc-pVDZ and H: aug-cc-pVDZ). B3LYP optimized geometries were used for frequency calculations.

| Li( <i>o</i> -Me <sub>2</sub> -1.1.1) <sup>0</sup> | Li( <i>o</i> -Me <sub>2</sub> -1.1.1) <sup>+</sup> | Na( <i>o</i> -Me <sub>2</sub> -1.1.1) <sup>0</sup> | Na( <i>o</i> -Me <sub>2</sub> -1.1.1) <sup>+</sup> | Na[24-Crown-8] <sup>0</sup> | Na[24-Crown-8] <sup>+</sup> | K[24-Crown-8] <sup>0</sup> | K[24-Crown-8] <sup>+</sup> | Li(3 <sup>6</sup> Adamanzane) <sup>0</sup> | Li(3 <sup>6</sup> Adamanzane) <sup>+</sup> |
|----------------------------------------------------|----------------------------------------------------|----------------------------------------------------|----------------------------------------------------|-----------------------------|-----------------------------|----------------------------|----------------------------|--------------------------------------------|--------------------------------------------|
| (cm <sup>-1</sup> )                                | (cm <sup>-1</sup> )                                | (cm <sup>-1</sup> )                                | (cm <sup>-1</sup> )                                | (cm <sup>-1</sup> )         | (cm <sup>-1</sup> )         | (cm <sup>-1</sup> )        | (cm <sup>-1</sup> )        | (cm <sup>-1</sup> )                        | (cm <sup>-1</sup> )                        |
| 34.4                                               | 30.6                                               | 41.5                                               | 43.5                                               | 41.7                        | 41.5                        | 3.6                        | 17.1                       | 103.7                                      | 103.3                                      |
| 40.4                                               | 33.7                                               | 58.2                                               | 62.6                                               | 42.7                        | 41.8                        | 23.0                       | 24.5                       | 115.7                                      | 115.8                                      |
| 54.8                                               | 39.4                                               | 58.2                                               | 62.6                                               | 42.7                        | 41.8                        | 38.9                       | 37.2                       | 115.7                                      | 115.8                                      |
| 62.0                                               | 55.6                                               | 73.5                                               | 77.7                                               | 47.9                        | 46.6                        | 39.5                       | 37.2                       | 124.7                                      | 124.5                                      |
| 69.4                                               | 57.7                                               | 73.5                                               | 77.7                                               | 47.9                        | 46.6                        | 65.9                       | 39.5                       | 38.7                                       | 156.3                                      |
| 89.3                                               | 74.4                                               | 85.2                                               | 87.8                                               | 74.7                        | 70.5                        | 50.0                       | 51.0                       | 170.4                                      | 168.6                                      |
| 100.8                                              | 82.5                                               | 104.9                                              | 110.0                                              | 76.0                        | 71.3                        | 68.3                       | 64.1                       | 171.3                                      | 168.6                                      |
| 115.9                                              | 117.8                                              | 105.0                                              | 110.0                                              | 83.0                        | 85.2                        | 85.3                       | 90.3                       | 174.2                                      | 174.2                                      |
| 134.7                                              | 139.2                                              | 118.9                                              | 128.5                                              | 83.0                        | 85.2                        | 85.3                       | 90.3                       | 224.1                                      | 226.2                                      |
| 143.8                                              | 141.3                                              | 119.0                                              | 128.5                                              | 107.3                       | 106.3                       | 108.2                      | 110.2                      | 236.9                                      | 237.3                                      |
| 149.4                                              | 141.9                                              | 149.5                                              | 151.4                                              | 140.0                       | 146.9                       | 111.7                      | 124.1                      | 236.9                                      | 237.3                                      |
| 160.1                                              | 165.5                                              | 149.5                                              | 151.4                                              | 145.4                       | 152.7                       | 119.2                      | 132.9                      | 242.3                                      | 242.1                                      |
| 164.9                                              | 176.9                                              | 163.5                                              | 166.1                                              | 145.4                       | 152.7                       | 119.2                      | 132.9                      | 266.0                                      | 266.1                                      |
| 173.3                                              | 181.2                                              | 179.4                                              | 181.2                                              | 154.8                       | 154.9                       | 123.1                      | 135.2                      | 266.0                                      | 266.1                                      |
| 179.2                                              | 182.9                                              | 179.4                                              | 181.2                                              | 164.1                       | 167.7                       | 133.4                      | 141.9                      | 273.0                                      | 273.0                                      |
| 202.1                                              | 193.4                                              | 181.0                                              | 183.6                                              | 164.1                       | 167.7                       | 133.4                      | 141.9                      | 288.9                                      | 288.9                                      |
| 202.9                                              | 207.4                                              | 181.0                                              | 186.8                                              | 164.2                       | 167.8                       | 145.5                      | 143.4                      | 298.1                                      | 303.7                                      |
| 211.5                                              | 211.4                                              | 181.9                                              | 186.8                                              | 186.6                       | 189.8                       | 182.8                      | 183.3                      | 298.1                                      | 303.7                                      |
| 222.0                                              | 216.5                                              | 198.2                                              | 200.9                                              | 186.6                       | 189.8                       | 190.8                      | 190.8                      | 317.4                                      | 319.0                                      |
| 236.8                                              | 232.4                                              | 199.9                                              | 210.0                                              | 190.8                       | 194.5                       | 191.5                      | 190.0                      | 321.7                                      | 323.5                                      |
| 241.9                                              | 234.2                                              | 230.9                                              | 234.7                                              | 193.9                       | 200.6                       | 191.5                      | 195.2                      | 336.5                                      | 339.2                                      |
| 245.3                                              | 239.4                                              | 230.9                                              | 234.7                                              | 246.5                       | 251.5                       | 224.2                      | 228.3                      | 336.5                                      | 339.2                                      |
| 252.0                                              | 240.6                                              | 237.9                                              | 241.2                                              | 252.8                       | 251.6                       | 227.1                      | 228.3                      | 363.7                                      | 363.7                                      |
| 272.4                                              | 274.0                                              | 274.0                                              | 274.0                                              | 274.0                       | 274.0                       | 227.1                      | 228.3                      | 407.2                                      | 407.2                                      |
| 276.2                                              | 284.8                                              | 274.1                                              | 277.2                                              | 253.1                       | 254.2                       | 232.8                      | 232.5                      | 411.2                                      | 411.6                                      |
| 282.9                                              | 285.8                                              | 274.1                                              | 277.2                                              | 272.4                       | 276.8                       | 275.8                      | 278.7                      | 429.4                                      | 429.4                                      |
| 283.7                                              | 286.4                                              | 278.9                                              | 280.4                                              | 283.0                       | 288.6                       | 279.8                      | 282.0                      | 429.4                                      | 429.4                                      |
| 289.4                                              | 289.9                                              | 279.7                                              | 283.7                                              | 283.0                       | 288.6                       | 282.8                      | 285.5                      | 446.3                                      | 445.6                                      |
| 297.2                                              | 291.9                                              | 286.3                                              | 288.9                                              | 301.0                       | 303.7                       | 282.8                      | 288.5                      | 461.3                                      | 460.4                                      |
| 305.6                                              | 293.0                                              | 286.3                                              | 288.9                                              | 305.2                       | 307.3                       | 294.0                      | 296.7                      | 461.3                                      | 460.4                                      |
| 342.7                                              | 325.3                                              | 326.3                                              | 326.7                                              | 311.6                       | 313.8                       | 294.0                      | 296.7                      | 495.8                                      | 495.8                                      |
| 348.7                                              | 338.4                                              | 333.8                                              | 332.8                                              | 311.6                       | 313.8                       | 295.8                      | 298.4                      | 515.5                                      | 518.0                                      |
| 390.0                                              | 394.9                                              | 394.9                                              | 394.9                                              | 395.9                       | 394.8                       | 324.8                      | 323.5                      | 515.5                                      | 518.0                                      |
| 395.9                                              | 400.2                                              | 394.9                                              | 395.9                                              | 359.6                       | 362.6                       | 361.7                      | 364.5                      | 518.7                                      | 523.8                                      |
| 407.5                                              | 406.8                                              | 394.9                                              | 396.2                                              | 378.5                       | 380.3                       | 373.3                      | 382.2                      | 566.7                                      | 575.3                                      |
| 408.3                                              | 407.9                                              | 394.9                                              | 396.2                                              | 378.5                       | 380.3                       | 373.3                      | 382.2                      | 567.4                                      | 575.3                                      |
| 467.9                                              | 477.1                                              | 473.9                                              | 475.5                                              | 388.4                       | 388.3                       | 389.3                      | 391.0                      | 567.4                                      | 575.4                                      |
| 482.9                                              | 485.3                                              | 485.3                                              | 485.3                                              | 485.3                       | 485.3                       | 510.2                      | 510.2                      | 624.0                                      | 624.0                                      |
| 491.2                                              | 488.8                                              | 485.3                                              | 485.2                                              | 520.3                       | 520.6                       | 516.2                      | 516.8                      | 645.3                                      | 645.7                                      |
| 492.8                                              | 494.0                                              | 487.8                                              | 489.4                                              | 521.1                       | 523.2                       | 516.2                      | 516.8                      | 710.8                                      | 712.1                                      |
| 495.3                                              | 495.3                                              | 487.8                                              | 489.4                                              | 523.9                       | 524.6                       | 524.4                      | 527.2                      | 710.8                                      | 712.1                                      |
| 502.0                                              | 498.5                                              | 496.5                                              | 498.6                                              | 580.4                       | 579.7                       | 579.7                      | 579.7                      | 733.7                                      | 733.7                                      |
| 567.4                                              | 568.1                                              | 565.9                                              | 566.4                                              | 580.4                       | 580.2                       | 576.6                      | 575.3                      | 780.6                                      | 781.0                                      |
| 574.9                                              | 575.3                                              | 571.6                                              | 572.6                                              | 581.0                       | 580.3                       | 576.6                      | 575.3                      | 798.9                                      | 800.6                                      |
| 604.3                                              | 612.8                                              | 614.3                                              | 614.4                                              | 581.0                       | 580.3                       | 579.7                      | 577.4                      | 798.9                                      | 800.6                                      |
| 608.0                                              | 618.4                                              | 614.3                                              | 614.4                                              | 613.6                       | 614.1                       | 616.8                      | 616.6                      | 813.4                                      | 813.7                                      |
| 631.3                                              | 627.9                                              | 627.5                                              | 627.5                                              | 617.7                       | 617.7                       | 616.5                      | 616.8                      | 833.8                                      | 834.1                                      |
| 633.2                                              | 630.7                                              | 617.6                                              | 618.6                                              | 614.7                       | 615.5                       | 616.9                      | 616.8                      | 866.4                                      | 868.5                                      |
| 763.9                                              | 764.7                                              | 759.8                                              | 760.8                                              | 619.1                       | 619.2                       | 619.5                      | 619.5                      | 866.4                                      | 868.5                                      |
| 768.6                                              | 769.8                                              | 764.7                                              | 765.5                                              | 632.5                       | 633.1                       | 630.1                      | 630.2                      | 877.8                                      | 881.6                                      |
| 836.4                                              | 843.3                                              | 839.3                                              | 839.3                                              | 645.1                       | 645.2                       | 647.4                      | 647.4                      | 880.9                                      | 880.9                                      |
| 842.6                                              | 845.0                                              | 839.3                                              | 838.7                                              | 845.1                       | 845.2                       | 847.4                      | 847.4                      | 888.9                                      | 890.0                                      |
| 847.0                                              | 847.4                                              | 840.9                                              | 840.7                                              | 864.4                       | 863.4                       | 871.2                      | 870.7                      | 902.2                                      | 903.3                                      |
| 872.3                                              | 870.5                                              | 875.2                                              | 875.8                                              | 913.0                       | 915.9                       | 915.1                      | 917.5                      | 909.9                                      | 909.9                                      |
| 881.7                                              | 879.2                                              | 875.3                                              | 875.8                                              | 924.1                       | 926.1                       | 926.4                      | 927.4                      | 920.0                                      | 920.1                                      |
| 889.5                                              | 891.5                                              | 891.7                                              | 891.7                                              | 924.1                       | 926.1                       | 926.4                      | 927.4                      | 931.1                                      | 931.1                                      |
| 905.0                                              | 895.7                                              | 891.7                                              | 891.9                                              | 929.5                       | 928.8                       | 929.3                      | 929.8                      | 955.5                                      | 955.5                                      |
| 921.7                                              | 938.6                                              | 932.1                                              | 937.1                                              | 932.5                       | 933.7                       | 937.8                      | 941.2                      | 956.0                                      | 957.5                                      |
| 940.8                                              | 945.2                                              | 939.4                                              | 940.8                                              | 932.5                       | 933.7                       | 937.8                      | 941.2                      | 956.0                                      | 957.5                                      |
| 945.1                                              | 947.7                                              | 943.7                                              | 943.7                                              | 943.7                       | 943.7                       | 943.0                      | 945.5                      | 980.9                                      | 980.9                                      |
| 956.0                                              | 955.7                                              | 954.4                                              | 954.2                                              | 937.2                       | 939.8                       | 945.5                      | 950.0                      | 1000.4                                     | 1001.4                                     |
| 966.6                                              | 965.4                                              | 958.9                                              | 958.9                                              | 1045.5                      | 1046.1                      | 1052.0                     | 1051.3                     | 1000.4                                     | 1001.4                                     |
| 968.6                                              | 967.6                                              | 957.9                                              | 958.9                                              | 1045.5                      | 1046.1                      | 1052.4                     | 1051.3                     | 1012.3                                     | 1012.3                                     |
| 971.5                                              | 968.5                                              | 969.2                                              | 976.4                                              | 1046.2                      | 1047.1                      | 1052.4                     | 1052.2                     | 1041.1                                     | 1044.2                                     |
| 977.7                                              | 977.0                                              | 976.2                                              | 976.2                                              | 1051.3                      | 1051.3                      | 1056.8                     | 1064.1                     | 1044.2                                     | 1044.2                                     |
| 981.8                                              | 980.3                                              | 978.7                                              | 978.9                                              | 1066.9                      | 1064.8                      | 1072.0                     | 1072.1                     | 1056.9                                     | 1058.4                                     |
| 1051.8                                             | 1054.9                                             | 1057.4                                             | 1057.8                                             | 1066.9                      | 1064.8                      | 1072.8                     | 1072.1                     | 1062.9                                     | 1062.9                                     |
| 1062.9                                             | 1060.1                                             | 1057.4                                             | 1057.8                                             | 1066.3                      | 1066.6                      | 1072.8                     | 1073.3                     | 1086.2                                     | 1086.8                                     |
| 1065.2                                             | 1074.5                                             | 1066.5                                             | 1079.4                                             | 1079.3                      | 1076.7                      | 1080.7                     | 1093.7                     | 1092.3                                     | 1092.3                                     |
| 1076.6                                             | 1074.9                                             | 1066.5                                             | 1079.4                                             | 1080.3                      | 1080.7                      | 1088.7                     | 1092.3                     | 1092.3                                     | 1092.3                                     |
| 1079.0                                             | 1079.1                                             | 1082.0                                             | 1081.3                                             | 1080.7                      | 1088.7                      | 1089.7                     | 1091.7                     | 1100.4                                     | 1101.3                                     |
| 1082.2                                             | 1080.1                                             | 1082.0                                             | 1081.3                                             | 1080.8                      | 1090.5                      | 1091.0                     | 1097.0                     | 1104.9                                     | 1104.9                                     |
| 1090.7                                             | 1083.1                                             | 1085.0                                             | 1082.7                                             | 1087.0                      | 1090.5                      | 1092.4                     | 1097.0                     | 1104.5                                     | 1106.9                                     |
| 1092.5                                             | 1092.2                                             | 1091.7                                             | 1091.7                                             | 1091.7                      | 1114.6                      | 1114.6                     | 1114.6                     | 1106.9                                     | 1106.9                                     |
| 1096.0                                             | 1102.5                                             | 1104.3                                             | 1103.1                                             | 1122.0                      | 1123.2                      | 1120.3                     | 1124.4                     | 1114.4                                     | 1114.4                                     |
| 1102.5                                             | 1105.5                                             | 1104.3                                             | 1103.7                                             | 1122.0                      | 1129.0                      | 1120.3                     | 1127.0                     | 1145.4                                     | 1144.2                                     |
| 1108.7                                             | 1105.6                                             | 1104.5                                             | 1103.7                                             | 1129.8                      | 1129.6                      | 1126.6                     | 1132.1                     | 1145.4                                     | 1144.2                                     |
| 1112.3                                             | 1110.9                                             | 1104.8                                             | 1106.0                                             | 1135.3                      | 1141.2                      | 1136.0                     | 1143.1                     | 1149.6                                     | 1149.2                                     |
| 1124.4                                             | 1137.3                                             | 1124.4                                             | 1137.3                                             | 1143.4                      | 1147.7                      | 1148.4                     | 1149.7                     | 1192.6                                     | 1192.6                                     |
| 1132.9                                             | 1137.5                                             | 1130.3                                             | 1138.1                                             | 1143.4                      | 1149.7                      | 1148.4                     | 1151.1                     | 1192.6                                     | 1192.6                                     |
| 1133.2                                             | 1141.4                                             | 1130.3                                             | 1138.1                                             | 1153.3                      | 1154.6                      | 1152.2                     | 1151.9                     | 1196.9                                     | 1196.9                                     |
| 1135.4                                             | 1143.2                                             | 1134.6                                             | 1138.9                                             | 1156.6                      | 1156.2                      | 1152.4                     | 1155.3                     | 1227.5                                     | 1228.1                                     |
| 1141.4                                             | 1147.7                                             | 1134.6                                             | 1138.9                                             | 1158.2                      | 1158.3                      | 1155.3                     | 1155.3                     | 1244.1                                     | 1244.1                                     |
| 1156.3                                             | 1159.1                                             | 1136.0                                             | 1143.1                                             | 1158.2                      | 1159.3                      | 1153.3                     | 1156.0                     | 1242.3                                     | 1244.1                                     |
| 1161.1                                             | 1164.9                                             | 1158.4                                             | 1167.1                                             | 1159.8                      | 1162.8                      | 1158.1                     | 1158.7                     | 1258.5                                     | 1258.5                                     |
| 1170.3                                             | 1172.3                                             | 1158.4                                             | 1167.1                                             | 1247.4                      | 1248.4                      | 1245.3                     | 1246.0                     | 1279.8                                     | 1279.8                                     |
| 1178.0                                             | 1182.9                                             | 1165.6                                             | 1179.6                                             | 1247.4                      | 1248.4                      | 1245.6                     | 1246.0                     | 1280.5                                     | 1282.3                                     |
| 1179.1                                             | 1192.7                                             | 1165.6                                             | 1179.6                                             | 1248.1                      | 1249.0                      | 1246.2                     | 1246.2                     | 1280.5                                     | 1282.3                                     |
| 1211.6                                             | 1220.9                                             | 1211.6                                             | 1217.1                                             | 1249.7                      | 1249.9                      | 1247.6                     | 1247.6                     | 1286.9                                     | 1288.5                                     |
| 1223.6                                             | 1233.3                                             | 1222.8                                             | 1227.5                                             | 1257.9                      | 1261.3                      | 1255.3                     | 1259.2                     | 1289.2                                     | 1292.2                                     |
| 1242.5                                             | 1244.2                                             | 1246.7                                             | 1247.3                                             | 1260.4                      | 1261.6                      | 1257.9                     | 1259.4                     | 1290.6                                     | 1293.6                                     |
| 1245.6                                             | 1246.1                                             | 1246.7                                             | 1247.3                                             | 1260.4                      | 1261.6                      | 1257.9                     | 1259.4                     | 1290.6                                     | 1293.6                                     |
| 1252.4                                             | 1256.4                                             | 1253.6                                             | 1255.4                                             | 1261.0                      | 1263.2                      | 1259.1                     | 1260.0                     | 1291.0                                     | 1295.0                                     |
| 1255.9                                             | 1257.9                                             | 1256.5                                             | 1258.9                                             | 1273.9                      | 1276.7                      | 1273.6                     | 1278.0                     | 1315.9                                     | 1318.3                                     |
| 1261.6                                             | 1259.0                                             | 1256.5                                             | 1258.9                                             | 1279.4                      | 1281.6                      | 1280.8                     | 1284.3                     | 1320.0                                     | 1322.8                                     |
| 1264.8                                             | 1265.7                                             | 1260.0                                             | 1261.9                                             | 1279.4                      | 1281.6                      | 1280.8                     | 1284.3                     | 1320.0                                     | 1322.8                                     |
| 1271.8                                             | 1269.7                                             | 1273.4                                             | 1273.4                                             | 1279.4                      | 1281.6                      | 1280.8                     | 1284.3                     | 1320.0                                     | 1322.8                                     |
| 1278.6                                             | 1278.1                                             | 1274.3                                             | 1277.3                                             | 1299.2                      | 1302.2                      | 1304.0                     | 1303.2                     | 1328.1                                     | 1330.3                                     |
| 1279.2                                             | 1279.1                                             | 1274.3                                             | 1277.3                                             | 1301.7                      | 1305.7                      | 1304.2                     | 1308.1                     | 1330.3                                     | 1332.6                                     |
| 1283.6                                             | 1286.7                                             | 1288.5                                             | 1291.7                                             | 1301.7                      | 1305.7                      | 1304.2                     | 1308.1                     | 1363.3                                     | 1363.3                                     |
| 1289.5                                             | 1291.0                                             | 1290.6                                             | 1293.5                                             | 1304.5                      | 1307.8                      | 1306.5                     | 1310.0                     | 1366.6                                     | 1367.0                                     |
| 1302.1                                             | 1294.2                                             | 1293.5                                             | 1296.5                                             | 1324.5                      | 1325.1                      | 1324.8                     | 1349.6                     | 1366.6                                     | 1367.0                                     |
| 1357.8                                             | 1358.6                                             | 1360.0                                             | 1360.1                                             | 1357.4                      | 1357.8                      | 1353.3                     | 1356.0                     | 1374.4                                     | 1374.4                                     |
| 1359.5                                             | 1360.2                                             | 1360.0                                             | 1360.1                                             | 1357.4                      | 1357.8                      | 1353.3                     | 1356.0                     | 1376.6                                     | 1379.3                                     |
| 1368.0                                             | 1363.5                                             | 1360.8                                             | 1362.8                                             | 1367.1                      | 1368.0                      | 1364.3                     | 1366.0                     | 1377.6                                     | 1379.3                                     |
| 1383.4                                             | 1381.2                                             | 1381.6                                             | 1381.6                                             | 1383.4                      | 1383.4                      | 1376.8                     | 1381.6                     | 1393.6                                     | 1395.5                                     |
| 1387.4                                             | 1388.5                                             | 1389.0                                             | 1389.9                                             | 1389.3                      | 1389.4                      | 1385.0                     | 1384.9                     | 1393.6                                     | 1395.5                                     |
| 1388.4                                             | 1390.4                                             | 1389.8                                             | 1389.9                                             | 1389.3                      | 1389.4                      | 1385.0                     | 1384.9                     | 1393.6                                     | 1395.5                                     |
| 1393.8                                             | 1394.7                                             | 1389.8                                             | 1390.                                              |                             |                             |                            |                            |                                            |                                            |

|        |        |        |        |        |        |        |        |        |        |
|--------|--------|--------|--------|--------|--------|--------|--------|--------|--------|
| 1467.3 | 1472.5 | 1467.2 | 1473.2 | 1467.7 | 1474.2 | 1468.2 | 1473.9 | 1466.1 | 1472.4 |
| 1468.4 | 1472.5 | 1467.2 | 1473.2 | 1470.0 | 1476.2 | 1469.8 | 1475.1 | 1466.3 | 1473.3 |
| 1468.7 | 1476.5 | 1467.5 | 1473.4 | 1470.0 | 1476.2 | 1469.8 | 1475.1 | 1466.3 | 1477.1 |
| 1469.3 | 1476.6 | 1467.5 | 1473.4 | 1473.2 | 1478.2 | 1472.6 | 1476.6 | 1470.9 | 1477.1 |
| 1471.0 | 1485.0 | 1477.5 | 1486.1 | 1479.8 | 1488.9 | 1477.9 | 1485.9 | 1472.2 | 1477.8 |
| 1477.1 | 1485.7 | 1477.5 | 1486.2 | 1483.0 | 1489.9 | 1480.9 | 1486.9 | 1472.2 | 1478.1 |
| 1481.1 | 1489.5 | 1477.5 | 1486.2 | 1483.0 | 1489.9 | 1480.9 | 1486.9 | 1476.5 | 1488.0 |
| 2959.0 | 2979.1 | 2964.4 | 2991.0 | 1485.3 | 1491.4 | 1482.6 | 1487.9 | 1476.5 | 1488.0 |
| 2960.0 | 2986.6 | 2964.4 | 2991.0 | 2966.4 | 2991.6 | 2955.6 | 2985.3 | 1483.3 | 1491.4 |
| 2965.6 | 2989.7 | 2964.7 | 2991.1 | 2966.5 | 2991.6 | 2955.9 | 2985.3 | 1488.8 | 1493.1 |
| 2967.5 | 2996.9 | 2971.5 | 2997.4 | 2966.5 | 2991.7 | 2955.9 | 2985.3 | 2928.3 | 2962.3 |
| 2975.3 | 3003.1 | 2971.5 | 2997.4 | 2967.2 | 2991.7 | 2956.7 | 2985.4 | 2929.6 | 2962.6 |
| 2983.2 | 3008.3 | 2972.3 | 2997.5 | 2973.3 | 3002.5 | 2965.1 | 2982.1 | 2929.6 | 2962.6 |
| 3008.0 | 3024.6 | 3009.3 | 3035.8 | 2973.3 | 3002.9 | 2965.4 | 2992.6 | 2930.0 | 2962.7 |
| 3008.6 | 3028.8 | 3009.3 | 3035.8 | 2973.7 | 3002.9 | 2965.4 | 2992.6 | 2931.5 | 2967.8 |
| 3009.3 | 3033.6 | 3010.3 | 3035.8 | 2973.7 | 3003.2 | 2965.9 | 2993.2 | 2933.7 | 2968.0 |
| 3010.3 | 3034.6 | 3010.3 | 3037.2 | 2982.3 | 3009.9 | 2973.2 | 2999.4 | 2933.7 | 2968.0 |
| 3010.5 | 3040.2 | 3010.4 | 3037.2 | 2982.8 | 3010.2 | 2973.6 | 2999.9 | 2935.2 | 2968.4 |
| 3010.6 | 3040.6 | 3010.8 | 3037.4 | 2982.8 | 3010.2 | 2973.6 | 2999.9 | 2943.6 | 2973.7 |
| 3015.4 | 3042.4 | 3017.3 | 3043.8 | 2983.8 | 3010.9 | 2974.7 | 3000.6 | 2943.7 | 2973.7 |
| 3015.6 | 3044.0 | 3017.4 | 3043.8 | 2999.4 | 3022.5 | 2989.8 | 3017.1 | 2943.7 | 2974.0 |
| 3016.6 | 3044.1 | 3017.4 | 3044.2 | 2999.4 | 3022.5 | 2989.8 | 3017.1 | 2944.3 | 2975.2 |
| 3020.1 | 3045.5 | 3017.5 | 3047.2 | 3000.5 | 3023.0 | 2990.7 | 3017.1 | 3015.1 | 3047.2 |
| 3032.9 | 3056.4 | 3017.8 | 3047.2 | 3000.7 | 3023.9 | 2990.7 | 3017.7 | 3017.0 | 3047.2 |
| 3033.0 | 3056.5 | 3017.8 | 3047.2 | 3019.1 | 3041.4 | 3011.4 | 3033.0 | 3017.0 | 3047.4 |
| 3035.6 | 3059.5 | 3028.5 | 3054.4 | 3019.1 | 3041.7 | 3011.5 | 3033.4 | 3017.0 | 3048.0 |
| 3036.3 | 3063.2 | 3029.3 | 3054.4 | 3019.1 | 3041.7 | 3011.5 | 3033.4 | 3017.9 | 3048.0 |
| 3089.5 | 3107.3 | 3099.0 | 3114.9 | 3019.4 | 3042.3 | 3012.3 | 3034.0 | 3018.8 | 3049.2 |
| 3092.6 | 3107.3 | 3099.6 | 3114.9 | 3025.2 | 3048.2 | 3017.3 | 3038.2 | 3043.2 | 3068.6 |
| 3094.2 | 3113.2 | 3099.6 | 3114.9 | 3025.5 | 3049.2 | 3017.7 | 3039.2 | 3043.2 | 3068.6 |
| 3095.3 | 3113.2 | 3099.9 | 3114.9 | 3025.5 | 3049.2 | 3017.7 | 3039.2 | 3050.0 | 3072.3 |
| 3107.4 | 3116.8 | 3101.3 | 3115.0 | 3025.6 | 3049.8 | 3018.0 | 3040.0 | 3058.5 | 3074.7 |
| 3107.7 | 3116.8 | 3101.3 | 3115.0 | 3025.6 | 3071.0 | 3038.9 | 3058.2 | 3058.5 | 3074.7 |
| 3124.0 | 3145.7 | 3120.6 | 3145.1 | 3052.8 | 3071.0 | 3038.9 | 3058.2 | 3059.7 | 3076.1 |
| 3124.1 | 3145.8 | 3120.6 | 3145.1 | 3052.9 | 3071.0 | 3039.0 | 3058.3 | 3069.2 | 3085.1 |
| 3132.5 | 3148.3 | 3120.9 | 3145.1 | 3052.9 | 3071.2 | 3039.2 | 3058.3 | 3072.8 | 3085.1 |
| 3132.6 | 3148.3 | 3120.9 | 3145.1 | 3104.0 | 3112.4 | 3083.6 | 3097.7 | 3072.8 | 3085.8 |
|        |        |        |        | 3104.0 | 3112.4 | 3083.6 | 3097.7 | 3075.3 | 3086.3 |
|        |        |        |        | 3104.0 | 3112.4 | 3083.6 | 3097.8 | 3079.9 | 3089.2 |
|        |        |        |        | 3104.2 | 3112.4 | 3083.8 | 3097.8 | 3080.6 | 3091.5 |
|        |        |        |        |        |        |        |        | 3080.6 | 3095.1 |
|        |        |        |        |        |        |        |        | 3080.8 | 3095.1 |
|        |        |        |        |        |        |        |        | 3085.2 | 3096.4 |
|        |        |        |        |        |        |        |        | 3088.8 | 3106.0 |
|        |        |        |        |        |        |        |        | 3088.8 | 3106.0 |
|        |        |        |        |        |        |        |        | 3092.0 | 3106.5 |

Table S10. Harmonic vibrational frequencies of 9-Crown-3, [2.1.1]Cryptand, *o*-Me<sub>2</sub>-1.1.1, 24-Crown-8, and 3<sup>6</sup>Adamanzane species at B3LYP level. B3LYP optimized geometries were used for frequency calculations.

| 9-Crown-3                       | [2.1.1]Cryptand                   | <i>o</i> -Me <sub>2</sub> -1.1.1 | 24-Crown-8                      | 3 <sup>6</sup> Adamanzane       |
|---------------------------------|-----------------------------------|----------------------------------|---------------------------------|---------------------------------|
| C,O: cc-pVTZ and H: aug-cc-pVTZ | C,O,N: cc-pVTZ and H: aug-cc-pVTZ | C,O: cc-pVDZ and H: aug-cc-pVDZ  | C,O: cc-pVDZ and H: aug-cc-pVDZ | C,N: cc-pVDZ and H: aug-cc-pVDZ |
| 143.1                           | 42.8                              | 30.9                             | 24.2                            | 80.0                            |
| 143.5                           | 57.3                              | 44.7                             | 26.6                            | 116.2                           |
| 192.3                           | 65.1                              | 46.0                             | 35.1                            | 116.2                           |
| 193.0                           | 84.2                              | 46.0                             | 37.2                            | 119.8                           |
| 249.5                           | 94.5                              | 68.8                             | 53.4                            | 164.4                           |
| 309.3                           | 102.2                             | 68.8                             | 54.3                            | 166.2                           |
| 375.9                           | 129.8                             | 118.3                            | 62.3                            | 166.2                           |
| 376.6                           | 144.5                             | 118.3                            | 73.8                            | 170.2                           |
| 389.1                           | 161.6                             | 130.1                            | 74.1                            | 208.3                           |
| 536.1                           | 168.5                             | 130.1                            | 83.2                            | 212.5                           |
| 537.2                           | 188.3                             | 132.9                            | 87.3                            | 214.7                           |
| 590.7                           | 190.4                             | 150.7                            | 110.8                           | 214.7                           |
| 806.6                           | 204.0                             | 150.7                            | 112.5                           | 271.3                           |
| 806.6                           | 235.4                             | 153.3                            | 121.1                           | 282.0                           |
| 806.7                           | 255.1                             | 160.8                            | 128.6                           | 296.3                           |
| 884.5                           | 274.2                             | 160.8                            | 144.4                           | 298.1                           |
| 884.5                           | 278.5                             | 186.0                            | 149.0                           | 298.1                           |
| 899.7                           | 291.9                             | 231.2                            | 156.5                           | 317.4                           |
| 1018.0                          | 312.8                             | 231.2                            | 159.5                           | 317.4                           |
| 1018.1                          | 333.6                             | 254.8                            | 173.4                           | 323.8                           |
| 1031.1                          | 338.5                             | 259.9                            | 181.5                           | 334.0                           |
| 1073.9                          | 341.4                             | 279.2                            | 207.5                           | 334.0                           |
| 1139.1                          | 358.1                             | 279.9                            | 213.9                           | 355.4                           |
| 1139.5                          | 381.9                             | 279.9                            | 222.0                           | 378.6                           |
| 1158.9                          | 421.7                             | 290.8                            | 232.3                           | 401.1                           |
| 1184.8                          | 446.1                             | 293.9                            | 269.4                           | 425.8                           |
| 1185.0                          | 464.8                             | 293.9                            | 275.5                           | 425.8                           |
| 1278.7                          | 483.1                             | 326.5                            | 290.1                           | 443.2                           |
| 1293.5                          | 497.6                             | 326.6                            | 319.9                           | 467.9                           |
| 1293.6                          | 521.4                             | 385.3                            | 335.4                           | 467.9                           |
| 1298.8                          | 530.6                             | 385.3                            | 352.7                           | 501.1                           |
| 1298.8                          | 580.0                             | 385.8                            | 359.5                           | 526.1                           |
| 1319.2                          | 626.0                             | 385.8                            | 400.1                           | 526.1                           |
| 1382.3                          | 748.8                             | 458.3                            | 420.3                           | 532.7                           |
| 1402.9                          | 764.6                             | 463.3                            | 429.0                           | 615.5                           |
| 1408.3                          | 780.6                             | 463.3                            | 470.9                           | 628.2                           |
| 1408.4                          | 810.4                             | 487.5                            | 510.4                           | 712.8                           |
| 1418.4                          | 822.1                             | 487.5                            | 521.6                           | 712.8                           |
| 1418.5                          | 833.3                             | 493.9                            | 542.8                           | 726.0                           |
| 1485.2                          | 837.5                             | 558.1                            | 551.6                           | 778.5                           |
| 1485.2                          | 877.7                             | 561.1                            | 563.9                           | 801.4                           |
| 1488.6                          | 895.4                             | 603.7                            | 575.3                           | 801.4                           |
| 1497.2                          | 923.3                             | 603.7                            | 612.1                           | 816.4                           |
| 1498.2                          | 926.6                             | 614.2                            | 624.5                           | 843.9                           |
| 1527.6                          | 943.8                             | 614.2                            | 626.3                           | 874.8                           |
| 2954.8                          | 969.5                             | 755.3                            | 632.6                           | 874.8                           |
| 2954.8                          | 979.6                             | 759.3                            | 636.7                           | 887.5                           |
| 2955.0                          | 987.1                             | 841.7                            | 649.7                           | 887.5                           |
| 2987.9                          | 1010.0                            | 841.7                            | 666.2                           | 888.7                           |
| 2988.0                          | 1045.1                            | 844.9                            | 684.5                           | 902.7                           |
| 2992.6                          | 1050.6                            | 879.0                            | 693.3                           | 906.3                           |
| 3031.3                          | 1055.8                            | 879.0                            | 705.3                           | 921.0                           |
| 3031.7                          | 1065.3                            | 890.1                            | 724.5                           | 929.6                           |
| 3049.9                          | 1069.0                            | 890.1                            | 750.0                           | 952.0                           |
| 3086.5                          | 1078.0                            | 941.3                            | 752.8                           | 952.0                           |
| 3086.6                          | 1084.5                            | 941.3                            | 1000.2                          | 966.9                           |
| 3087.8                          | 1200.8                            | 943.6                            | 1032.7                          | 1004.8                          |
|                                 | 1203.8                            | 890.1                            | 1037.9                          | 1005.6                          |
|                                 | 1118.9                            | 964.1                            | 1051.9                          | 1005.6                          |
|                                 | 1122.3                            | 967.9                            | 1059.1                          | 1023.2                          |
|                                 | 1127.8                            | 967.9                            | 1068.7                          | 1062.2                          |
|                                 | 1134.0                            | 977.6                            | 1070.9                          | 1062.2                          |
|                                 | 1147.2                            | 977.6                            | 1078.0                          | 1063.5                          |
|                                 | 1155.5                            | 1076.8                           | 1080.5                          | 1068.5                          |
|                                 | 1193.7                            | 1076.8                           | 1093.2                          | 1098.9                          |
|                                 | 1200.8                            | 1079.0                           | 1096.4                          | 1098.9                          |
|                                 | 1203.8                            | 1082.0                           | 1113.8                          | 1103.2                          |
|                                 | 1211.0                            | 1082.0                           | 1125.0                          | 1105.9                          |
|                                 | 1248.7                            | 1096.9                           | 1129.6                          | 1113.2                          |
|                                 | 1260.6                            | 1096.9                           | 1132.2                          | 1113.2                          |
|                                 | 1269.3                            | 1097.6                           | 1139.4                          | 1139.1                          |
|                                 | 1272.7                            | 1100.3                           | 1142.3                          | 1142.4                          |
|                                 | 1276.3                            | 1101.2                           | 1143.5                          | 1165.9                          |
|                                 | 1280.0                            | 1101.2                           | 1149.1                          | 1167.2                          |
|                                 | 1291.2                            | 1108.0                           | 1155.6                          | 1167.2                          |
|                                 | 1311.4                            | 1137.5                           | 1157.2                          | 1222.3                          |
|                                 | 1318.9                            | 1144.3                           | 1162.4                          | 1222.8                          |
|                                 | 1319.7                            | 1144.3                           | 1165.5                          | 1222.8                          |
|                                 | 1327.8                            | 1162.2                           | 1167.6                          | 1226.3                          |
|                                 | 1337.8                            | 1162.2                           | 1172.0                          | 1245.3                          |
|                                 | 1349.6                            | 1176.8                           | 1174.3                          | 1245.3                          |
|                                 | 1352.8                            | 1187.8                           | 1179.6                          | 1251.7                          |
|                                 | 1369.4                            | 1187.8                           | 1210.3                          | 1276.3                          |
|                                 | 1372.1                            | 1189.8                           | 1219.6                          | 1276.3                          |
|                                 | 1380.0                            | 1194.1                           | 1221.8                          | 1281.9                          |
|                                 | 1387.3                            | 1194.1                           | 1239.4                          | 1282.8                          |
|                                 | 1390.9                            | 1201.3                           | 1246.2                          | 1293.1                          |
|                                 | 1394.2                            | 1239.8                           | 1249.2                          | 1297.7                          |
|                                 | 1399.1                            | 1241.3                           | 1256.3                          | 1297.7                          |
|                                 | 1404.0                            | 1241.3                           | 1260.1                          | 1305.7                          |
|                                 | 1415.2                            | 1252.4                           | 1280.2                          | 1318.1                          |
|                                 | 1418.4                            | 1255.4                           | 1282.5                          | 1318.4                          |
|                                 | 1425.4                            | 1255.4                           | 1283.1                          | 1324.8                          |
|                                 | 1435.4                            | 1282.1                           | 1286.6                          | 1324.8                          |
|                                 | 1441.5                            | 1282.1                           | 1291.5                          | 1329.1                          |
|                                 | 1442.7                            | 1282.7                           | 1294.5                          | 1329.8                          |
|                                 | 1474.6                            | 1290.1                           | 1301.3                          | 1364.6                          |
|                                 | 1485.1                            | 1290.8                           | 1306.7                          | 1366.9                          |
|                                 | 1485.5                            | 1290.8                           | 1323.3                          | 1366.9                          |
|                                 | 1488.5                            | 1355.4                           | 1329.5                          | 1371.5                          |
|                                 | 1490.2                            | 1355.4                           | 1350.7                          | 1376.9                          |
|                                 | 1493.6                            | 1357.6                           | 1351.4                          | 1376.9                          |
|                                 | 1498.5                            | 1379.0                           | 1364.1                          | 1392.4                          |
|                                 | 1501.6                            | 1383.7                           | 1368.2                          | 1397.5                          |
|                                 | 1506.1                            | 1386.4                           | 1377.6                          | 1397.5                          |
|                                 | 1507.9                            | 1387.3                           | 1384.9                          | 1401.3                          |
|                                 | 1510.4                            | 1387.3                           | 1394.5                          | 1409.8                          |
|                                 | 1522.6                            | 1393.6                           | 1400.8                          | 1409.8                          |
|                                 | 1527.4                            | 1403.7                           | 1413.9                          | 1411.7                          |
|                                 | 1530.1                            | 1403.7                           | 1425.1                          | 1416.2                          |
|                                 | 2891.7                            | 1428.6                           | 1425.9                          | 1416.2                          |
|                                 | 2915.9                            | 1432.5                           | 1440.8                          | 1416.4                          |
|                                 | 2946.4                            | 1432.5                           | 1447.2                          | 1425.0                          |
|                                 | 2952.4                            | 1446.8                           | 1452.2                          | 1425.8                          |
|                                 | 2959.5                            | 1446.8                           | 1453.9                          | 1457.0                          |
|                                 | 2960.9                            | 1448.0                           | 1455.0                          | 1458.8                          |
|                                 | 2976.5                            | 1455.2                           | 1455.8                          | 1458.8                          |
|                                 | 2976.8                            | 1455.2                           | 1459.0                          | 1461.6                          |
|                                 | 2986.6                            | 1456.2                           | 1460.4                          | 1463.7                          |
|                                 | 2989.1                            | 1456.2                           | 1463.5                          | 1464.9                          |
|                                 | 2997.0                            | 1458.7                           | 1466.0                          | 1465.5                          |

|  |        |        |        |        |
|--|--------|--------|--------|--------|
|  | 2998.1 | 1460.9 | 1469.8 | 1465.5 |
|  | 3002.5 | 1467.1 | 1479.6 | 1469.5 |
|  | 3012.3 | 1467.1 | 1481.6 | 1471.1 |
|  | 3015.7 | 1467.7 | 1483.1 | 1471.9 |
|  | 3020.5 | 1467.7 | 1491.6 | 1474.4 |
|  | 3026.6 | 1477.8 | 1495.6 | 1474.4 |
|  | 3031.2 | 1478.8 | 1499.9 | 1475.3 |
|  | 3037.2 | 1478.8 | 1505.5 | 1480.8 |
|  | 3052.5 | 2944.1 | 1507.2 | 1480.8 |
|  | 3054.3 | 2944.1 | 2950.0 | 1486.7 |
|  | 3060.5 | 2944.3 | 2953.6 | 1488.4 |
|  | 3065.6 | 2953.0 | 2958.3 | 2838.6 |
|  | 3068.1 | 2953.0 | 2959.2 | 2838.7 |
|  | 3073.3 | 2953.6 | 2960.5 | 2838.7 |
|  | 3088.9 | 2994.8 | 2965.9 | 2838.8 |
|  | 3135.1 | 2994.8 | 2968.3 | 2844.8 |
|  | 3139.8 | 2996.0 | 2968.6 | 2845.3 |
|  |        | 2996.0 | 2973.3 | 2845.3 |
|  |        | 2996.1 | 2976.6 | 2846.1 |
|  |        | 2998.2 | 2976.9 | 2866.2 |
|  |        | 3002.9 | 2979.0 | 2866.4 |
|  |        | 3003.2 | 2983.4 | 2866.4 |
|  |        | 3003.2 | 2988.3 | 2871.2 |
|  |        | 3005.1 | 2995.4 | 3026.6 |
|  |        | 3005.1 | 2996.4 | 3026.7 |
|  |        | 3005.6 | 2997.4 | 3027.6 |
|  |        | 3041.4 | 3004.9 | 3027.7 |
|  |        | 3041.5 | 3006.2 | 3027.7 |
|  |        | 3105.9 | 3008.7 | 3028.3 |
|  |        | 3105.9 | 3012.1 | 3047.5 |
|  |        | 3105.9 | 3013.9 | 3047.5 |
|  |        | 3106.2 | 3016.6 | 3048.1 |
|  |        | 3106.5 | 3016.9 | 3050.9 |
|  |        | 3106.5 | 3028.9 | 3050.9 |
|  |        | 3129.2 | 3029.1 | 3055.0 |
|  |        | 3129.2 | 3035.3 | 3067.3 |
|  |        | 3129.3 | 3045.4 | 3071.2 |
|  |        | 3129.3 | 3073.9 | 3071.2 |
|  |        |        | 3075.5 | 3073.8 |
|  |        |        | 3078.8 | 3090.4 |
|  |        |        | 3095.9 | 3090.4 |
|  |        |        |        | 3090.7 |
|  |        |        |        | 3091.4 |
|  |        |        |        | 3107.8 |
|  |        |        |        | 3109.6 |
|  |        |        |        | 3112.2 |
|  |        |        |        | 3112.2 |

Table S11. Harmonic vibrational frequencies of K([10]aneN<sub>4</sub>)<sub>2</sub>, Methylated-K[2.2.2]Cryptand, and Ethylated-K[2.2.2]Cryptand species at B3LYP level (M=Na/K,C,O,N: cc-pVDZ and H: aug-cc-pVDZ). B3LYP optimized geometries were used for frequency calculations.

| K([10]aneN <sub>4</sub> ) <sub>2</sub> | Methylated-K[2.2.2]Cryptand | Ethylated-K[2.2.2]Cryptand |
|----------------------------------------|-----------------------------|----------------------------|
| -3.0                                   | -34.7                       | 10.6                       |
| 26.9                                   | -19.7                       | 10.7                       |
| 26.9                                   | -19.3                       | 23.0                       |
| 60.8                                   | -9.9                        | 31.0                       |
| 66.8                                   | 49.5                        | 44.7                       |
| 66.8                                   | 50.2                        | 44.7                       |
| 79.7                                   | 52.6                        | 64.9                       |
| 80.2                                   | 74.6                        | 70.0                       |
| 125.6                                  | 75.5                        | 71.5                       |
| 132.5                                  | 75.7                        | 71.5                       |
| 133.7                                  | 80.8                        | 74.8                       |
| 133.7                                  | 82.4                        | 76.7                       |
| 146.1                                  | 99.7                        | 76.7                       |
| 148.2                                  | 100.4                       | 81.4                       |
| 155.7                                  | 101.2                       | 81.4                       |
| 199.5                                  | 104.6                       | 92.5                       |
| 201.7                                  | 104.8                       | 92.5                       |
| 220.0                                  | 134.0                       | 97.8                       |
| 220.0                                  | 146.7                       | 98.0                       |
| 224.5                                  | 146.7                       | 98.2                       |
| 224.5                                  | 152.6                       | 119.2                      |
| 258.2                                  | 154.5                       | 142.9                      |
| 258.2                                  | 163.6                       | 144.7                      |
| 259.6                                  | 164.1                       | 144.7                      |
| 259.6                                  | 181.9                       | 154.0                      |
| 275.1                                  | 182.2                       | 154.0                      |
| 281.4                                  | 187.7                       | 172.5                      |
| 287.1                                  | 201.8                       | 176.0                      |
| 289.8                                  | 214.3                       | 186.1                      |
| 319.2                                  | 215.4                       | 186.1                      |
| 320.8                                  | 230.0                       | 198.8                      |
| 339.5                                  | 232.4                       | 201.5                      |
| 339.5                                  | 233.3                       | 201.5                      |
| 341.9                                  | 259.2                       | 214.0                      |
| 341.9                                  | 268.2                       | 215.8                      |
| 401.7                                  | 268.5                       | 215.8                      |
| 405.8                                  | 306.2                       | 221.1                      |
| 462.7                                  | 306.8                       | 227.8                      |
| 464.4                                  | 337.7                       | 227.8                      |
| 532.7                                  | 339.7                       | 237.1                      |
| 532.7                                  | 346.5                       | 237.1                      |
| 533.3                                  | 347.1                       | 250.0                      |
| 533.3                                  | 349.6                       | 276.9                      |
| 579.9                                  | 355.0                       | 295.1                      |
| 585.8                                  | 355.3                       | 295.1                      |
| 712.0                                  | 375.3                       | 301.4                      |
| 727.1                                  | 386.9                       | 313.6                      |
| 739.1                                  | 387.2                       | 313.7                      |
| 739.1                                  | 412.9                       | 335.5                      |
| 756.8                                  | 420.3                       | 335.5                      |
| 756.8                                  | 420.3                       | 343.2                      |
| 781.0                                  | 460.3                       | 344.5                      |
| 804.5                                  | 464.4                       | 351.5                      |
| 844.2                                  | 464.5                       | 351.5                      |
| 844.2                                  | 500.9                       | 359.9                      |
| 848.0                                  | 506.9                       | 368.2                      |
| 848.0                                  | 507.0                       | 368.2                      |
| 852.0                                  | 518.7                       | 375.4                      |
| 855.0                                  | 526.4                       | 391.8                      |
| 887.6                                  | 526.5                       | 391.8                      |
| 893.0                                  | 565.8                       | 414.3                      |
| 897.3                                  | 573.8                       | 420.4                      |
| 898.1                                  | 578.6                       | 420.4                      |
| 902.4                                  | 578.8                       | 473.2                      |
| 902.8                                  | 585.5                       | 482.0                      |
| 944.4                                  | 585.6                       | 482.0                      |
| 944.4                                  | 767.8                       | 505.5                      |
| 946.9                                  | 768.4                       | 512.1                      |
| 946.9                                  | 831.8                       | 512.1                      |
| 1017.7                                 | 831.8                       | 535.9                      |
| 1017.7                                 | 835.1                       | 541.9                      |
| 1018.2                                 | 835.2                       | 541.9                      |
| 1018.2                                 | 842.2                       | 577.3                      |
| 1023.1                                 | 852.9                       | 584.6                      |
| 1023.6                                 | 866.5                       | 584.6                      |
| 1037.5                                 | 866.5                       | 585.6                      |
| 1038.3                                 | 891.6                       | 587.3                      |
| 1069.4                                 | 914.1                       | 587.3                      |
| 1070.2                                 | 914.1                       | 754.0                      |
| 1102.1                                 | 927.5                       | 758.1                      |
| 1102.1                                 | 927.7                       | 761.5                      |
| 1102.5                                 | 939.2                       | 761.5                      |
| 1102.5                                 | 940.9                       | 765.8                      |
| 1128.4                                 | 940.9                       | 765.8                      |
| 1128.6                                 | 946.8                       | 778.8                      |
| 1159.9                                 | 948.8                       | 787.1                      |
| 1159.9                                 | 948.8                       | 844.4                      |
| 1160.5                                 | 980.8                       | 844.4                      |
| 1160.5                                 | 985.3                       | 857.9                      |
| 1165.9                                 | 985.3                       | 860.2                      |
| 1166.0                                 | 1035.5                      | 860.2                      |
| 1189.1                                 | 1041.5                      | 889.3                      |
| 1189.3                                 | 1042.0                      | 901.8                      |
| 1222.8                                 | 1042.1                      | 901.8                      |
| 1225.5                                 | 1055.3                      | 904.4                      |
| 1255.0                                 | 1055.6                      | 916.0                      |
| 1255.0                                 | 1058.1                      | 916.0                      |
| 1258.9                                 | 1060.3                      | 936.1                      |
| 1258.9                                 | 1060.3                      | 941.3                      |
| 1266.1                                 | 1073.7                      | 941.3                      |
| 1266.4                                 | 1085.7                      | 943.1                      |
| 1279.8                                 | 1091.3                      | 943.1                      |
| 1280.2                                 | 1094.9                      | 1003.1                     |
| 1297.4                                 | 1095.0                      | 1003.1                     |
| 1297.4                                 | 1099.6                      | 1008.4                     |
| 1297.4                                 | 1107.5                      | 1010.9                     |
| 1297.4                                 | 1108.3                      | 1011.8                     |
| 1314.6                                 | 1108.3                      | 1015.0                     |
| 1315.0                                 | 1112.3                      | 1015.0                     |
| 1358.4                                 | 1112.3                      | 1019.2                     |
| 1358.6                                 | 1122.1                      | 1019.2                     |
| 1376.7                                 | 1122.2                      | 1047.4                     |
| 1376.7                                 | 1123.3                      | 1048.0                     |
| 1378.4                                 | 1132.3                      | 1048.0                     |
| 1378.4                                 | 1134.5                      | 1050.2                     |
| 1378.7                                 | 1134.6                      | 1050.2                     |
| 1379.7                                 | 1175.4                      | 1052.6                     |
| 1392.9                                 | 1175.8                      | 1052.7                     |
| 1392.9                                 | 1178.8                      | 1063.0                     |
| 1393.2                                 | 1179.4                      | 1063.0                     |
| 1393.6                                 | 1208.4                      | 1074.7                     |
| 1393.8                                 | 1209.6                      | 1074.7                     |
| 1393.8                                 | 1209.8                      | 1075.5                     |
| 1405.8                                 | 1258.0                      | 1075.5                     |
| 1411.5                                 | 1258.7                      | 1088.3                     |
| 1456.6                                 | 1272.1                      | 1091.5                     |

|        |        |        |
|--------|--------|--------|
| 1457.6 | 1272.1 | 1098.6 |
| 1458.6 | 1276.3 | 1098.6 |
| 1459.7 | 1276.4 | 1107.5 |
| 1459.7 | 1295.7 | 1109.0 |
| 1460.1 | 1295.9 | 1109.0 |
| 1460.1 | 1296.3 | 1110.7 |
| 1460.8 | 1319.7 | 1110.7 |
| 1472.7 | 1319.9 | 1112.0 |
| 1472.7 | 1323.5 | 1120.5 |
| 1472.9 | 1325.3 | 1120.5 |
| 1472.9 | 1328.2 | 1122.8 |
| 1472.9 | 1328.3 | 1131.7 |
| 1472.9 | 1329.0 | 1131.7 |
| 1480.3 | 1329.3 | 1133.8 |
| 1480.9 | 1330.4 | 1172.6 |
| 1488.2 | 1342.2 | 1172.7 |
| 1488.2 | 1342.2 | 1175.5 |
| 1488.6 | 1343.7 | 1175.5 |
| 1488.6 | 1376.2 | 1188.4 |
| 1488.9 | 1379.0 | 1192.2 |
| 1491.9 | 1379.2 | 1192.2 |
| 1494.5 | 1385.0 | 1252.4 |
| 1495.3 | 1385.7 | 1252.9 |
| 2928.4 | 1385.8 | 1252.9 |
| 2928.4 | 1396.1 | 1257.2 |
| 2928.4 | 1396.1 | 1258.6 |
| 2928.6 | 1397.1 | 1271.7 |
| 2928.6 | 1397.2 | 1271.7 |
| 2928.6 | 1397.3 | 1273.2 |
| 2928.8 | 1405.3 | 1273.5 |
| 2929.0 | 1405.5 | 1276.0 |
| 2948.5 | 1405.7 | 1278.3 |
| 2948.6 | 1408.9 | 1278.3 |
| 2949.9 | 1423.2 | 1280.1 |
| 2949.9 | 1429.5 | 1281.3 |
| 2950.1 | 1429.6 | 1281.3 |
| 2950.1 | 1432.2 | 1305.3 |
| 2951.9 | 1435.2 | 1305.3 |
| 2953.9 | 1435.3 | 1305.9 |
| 3026.1 | 1453.4 | 1320.1 |
| 3026.7 | 1453.5 | 1320.1 |
| 3027.6 | 1454.7 | 1320.2 |
| 3027.6 | 1454.9 | 1321.9 |
| 3027.7 | 1455.0 | 1325.8 |
| 3028.0 | 1462.4 | 1325.8 |
| 3028.1 | 1462.5 | 1338.9 |
| 3028.1 | 1462.9 | 1338.9 |
| 3063.9 | 1463.0 | 1340.6 |
| 3064.3 | 1466.9 | 1364.4 |
| 3072.5 | 1466.9 | 1364.4 |
| 3072.5 | 1467.3 | 1366.0 |
| 3073.7 | 1474.3 | 1373.3 |
| 3073.7 | 1474.5 | 1373.3 |
| 3083.4 | 1477.8 | 1374.1 |
| 3083.6 | 1479.4 | 1378.7 |
| 3383.6 | 1479.7 | 1378.7 |
| 3385.9 | 1480.1 | 1380.7 |
| 3385.9 | 1485.8 | 1391.5 |
| 3405.2 | 1486.7 | 1391.5 |
| 3407.7 | 1486.9 | 1399.0 |
| 3407.7 | 1491.3 | 1399.2 |
| 3410.0 | 1513.8 | 1399.2 |
| 3410.8 | 1514.8 | 1399.6 |
|        | 2932.2 | 1401.0 |
|        | 2932.2 | 1401.0 |
|        | 2932.6 | 1402.4 |
|        | 2932.7 | 1404.1 |
|        | 2939.6 | 1404.2 |
|        | 2941.9 | 1407.8 |
|        | 2961.9 | 1423.1 |
|        | 2962.6 | 1426.5 |
|        | 2962.7 | 1426.5 |
|        | 2977.5 | 1437.9 |
|        | 2977.8 | 1437.9 |
|        | 2977.8 | 1438.3 |
|        | 2994.7 | 1455.9 |
|        | 2995.0 | 1455.9 |
|        | 2995.2 | 1458.6 |
|        | 2995.4 | 1458.6 |
|        | 2995.4 | 1458.6 |
|        | 2995.7 | 1461.4 |
|        | 3040.3 | 1461.4 |
|        | 3041.0 | 1465.4 |
|        | 3041.0 | 1466.1 |
|        | 3043.9 | 1466.1 |
|        | 3044.3 | 1466.2 |
|        | 3044.3 | 1467.1 |
|        | 3051.8 | 1467.2 |
|        | 3054.1 | 1467.2 |
|        | 3054.2 | 1468.9 |
|        | 3054.5 | 1474.5 |
|        | 3060.9 | 1474.5 |
|        | 3060.9 | 1474.8 |
|        | 3092.6 | 1477.6 |
|        | 3092.9 | 1477.6 |
|        | 3093.7 | 1478.1 |
|        | 3093.7 | 1478.4 |
|        | 3094.8 | 1480.6 |
|        | 3094.9 | 1480.7 |
|        | 3122.4 | 1489.2 |
|        | 3124.8 | 1490.5 |
|        | 3124.9 | 1490.5 |
|        | 3125.6 | 1494.1 |
|        | 3127.9 | 1494.9 |
|        | 3127.9 | 1494.9 |
|        | 3130.2 | 2945.6 |
|        | 3130.4 | 2945.6 |
|        | 3130.4 | 2945.7 |
|        | 3141.7 | 2945.7 |
|        | 3142.1 | 2952.0 |
|        | 3142.1 | 2954.5 |
|        |        | 2958.5 |
|        |        | 2959.2 |
|        |        | 2959.2 |
|        |        | 2973.4 |
|        |        | 2973.6 |
|        |        | 2973.6 |
|        |        | 2988.0 |
|        |        | 2988.2 |
|        |        | 2988.4 |
|        |        | 2988.4 |
|        |        | 2988.6 |
|        |        | 2988.6 |
|        |        | 3021.4 |
|        |        | 3021.5 |
|        |        | 3021.5 |
|        |        | 3021.7 |
|        |        | 3021.9 |
|        |        | 3021.9 |
|        |        | 3048.2 |
|        |        | 3048.4 |
|        |        | 3048.4 |
|        |        | 3049.3 |
|        |        | 3049.8 |
|        |        | 3049.8 |
|        |        | 3052.6 |
|        |        | 3053.2 |

|  |  |        |
|--|--|--------|
|  |  | 3053.2 |
|  |  | 3053.9 |
|  |  | 3054.4 |
|  |  | 3054.4 |
|  |  | 3076.4 |
|  |  | 3076.4 |
|  |  | 3076.4 |
|  |  | 3077.7 |
|  |  | 3078.0 |
|  |  | 3078.0 |
|  |  | 3084.3 |
|  |  | 3084.7 |
|  |  | 3086.2 |
|  |  | 3086.2 |
|  |  | 3087.0 |
|  |  | 3087.0 |
|  |  | 3097.9 |
|  |  | 3098.2 |
|  |  | 3098.2 |
|  |  | 3101.4 |
|  |  | 3101.4 |
|  |  | 3101.4 |
|  |  | 3101.4 |
|  |  | 3104.0 |
|  |  | 3104.0 |
|  |  | 3104.1 |
|  |  | 3104.1 |
|  |  | 3104.2 |
|  |  | 3104.2 |



Table S12. VEEs (eV) for Li(9-Crown-3)<sub>2</sub> at the KT, D2, P3, and P3+ levels of theory with the H: d-aug-cc-pVDZ, Li,C,O: DZ basis set. The states are ordered according to P3+ excitation energies.

| Approximate Superatomic orbital | Final State (S <sub>6</sub> ) | VEE (eV) |       |       |       |
|---------------------------------|-------------------------------|----------|-------|-------|-------|
|                                 |                               | KT       | D2    | P3    | P3+   |
| 1S                              | 1 <sup>2</sup> A <sub>g</sub> | 0.000    | 0.000 | 0.000 | 0.000 |
| 1P                              | 1 <sup>2</sup> A <sub>u</sub> | 0.122    | 0.123 | 0.125 | 0.124 |
| 1P                              | 1 <sup>2</sup> E <sub>u</sub> | 0.191    | 0.229 | 0.228 | 0.228 |
| 1D                              | 2 <sup>2</sup> A <sub>g</sub> | 0.396    | 0.416 | 0.421 | 0.420 |
| 1D                              | 1 <sup>2</sup> E <sub>g</sub> | 0.492    | 0.577 | 0.576 | 0.576 |
| 1D                              | 2 <sup>2</sup> E <sub>g</sub> | 0.538    | 0.638 | 0.639 | 0.638 |
| 1F                              | 2 <sup>2</sup> A <sub>u</sub> | 0.851    | 0.973 | 0.977 | 0.976 |
| 1F                              | 2 <sup>2</sup> E <sub>u</sub> | 0.863    | 0.990 | 0.993 | 0.993 |
| 1F                              | 3 <sup>2</sup> E <sub>u</sub> | 0.901    | 1.049 | 1.051 | 1.050 |
| 2S                              | 3 <sup>2</sup> A <sub>g</sub> | 1.041    | 1.103 | 1.111 | 1.110 |
| 1F                              | 3 <sup>2</sup> A <sub>u</sub> | 0.958    | 1.123 | 1.126 | 1.126 |
| 1F                              | 4 <sup>2</sup> A <sub>u</sub> | 0.978    | 1.126 | 1.131 | 1.130 |
| 2P                              | 4 <sup>2</sup> E <sub>u</sub> | 1.163    | 1.228 | 1.234 | 1.233 |
| 2P                              | 5 <sup>2</sup> A <sub>u</sub> | 1.347    | 1.308 | 1.318 | 1.317 |
| 2D                              | 4 <sup>2</sup> A <sub>g</sub> | 1.500    | 1.408 | 1.423 | 1.421 |
| 1G                              | 3 <sup>2</sup> E <sub>g</sub> | 1.296    | 1.484 | 1.489 | 1.488 |
| 1G                              | 4 <sup>2</sup> E <sub>g</sub> | 1.314    | 1.495 | 1.500 | 1.499 |
| 1G                              | 5 <sup>2</sup> A <sub>g</sub> | 1.325    | 1.525 | 1.529 | 1.529 |
| 2D                              | 5 <sup>2</sup> E <sub>g</sub> | 1.680    | 1.667 | 1.668 | 1.667 |
| 2D                              | 6 <sup>2</sup> E <sub>g</sub> | 1.741    | 1.715 | 1.717 | 1.717 |

Table S13. Vertical electron attachment energies (VEAE) and pole strengths (PS) of Li(9-Crown-3)<sub>2</sub><sup>+</sup> at Li(9-Crown-3)<sub>2</sub> CAM-B3LYP geometry, from electron propagator methods using the H: d-aug-cc-pVDZ, Li,C,O: cc-pVDZ basis set. All valence electrons correlated.

| Final State (S <sub>6</sub> ) | Li(9-Crown-3) <sub>2</sub> <sup>+</sup> |        |       |        |       |        |       |  |
|-------------------------------|-----------------------------------------|--------|-------|--------|-------|--------|-------|--|
|                               | KT                                      |        | D2    |        | P3    |        | P3+   |  |
|                               | VEAE                                    | VEAE   | PS    | VEAE   | PS    | VEAE   | PS    |  |
| 2A <sub>g</sub>               | -1.653                                  | -1.893 | 0.991 | -1.902 | 0.989 | -1.901 | 0.989 |  |
| 2A <sub>u</sub>               | -1.531                                  | -1.770 | 0.991 | -1.777 | 0.989 | -1.777 | 0.989 |  |
| 2E <sub>u</sub>               | -1.462                                  | -1.664 | 0.993 | -1.674 | 0.991 | -1.673 | 0.991 |  |
| 2A <sub>g</sub>               | -1.257                                  | -1.477 | 0.992 | -1.481 | 0.991 | -1.481 | 0.991 |  |
| 2E <sub>g</sub>               | -1.161                                  | -1.316 | 0.994 | -1.326 | 0.993 | -1.325 | 0.993 |  |
| 2E <sub>g</sub>               | -1.115                                  | -1.255 | 0.995 | -1.263 | 0.994 | -1.263 | 0.994 |  |
| 2A <sub>u</sub>               | -0.802                                  | -0.920 | 0.996 | -0.925 | 0.995 | -0.925 | 0.995 |  |
| 2E <sub>u</sub>               | -0.790                                  | -0.903 | 0.996 | -0.909 | 0.995 | -0.908 | 0.995 |  |
| 2E <sub>u</sub>               | -0.752                                  | -0.844 | 0.997 | -0.851 | 0.996 | -0.851 | 0.996 |  |
| 2A <sub>u</sub>               | -0.695                                  | -0.770 | 0.997 | -0.776 | 0.997 | -0.775 | 0.997 |  |
| 2A <sub>u</sub>               | -0.675                                  | -0.767 | 0.997 | -0.771 | 0.996 | -0.771 | 0.996 |  |
| 2A <sub>g</sub>               | -0.612                                  | -0.790 | 0.993 | -0.791 | 0.993 | -0.791 | 0.993 |  |
| 2E <sub>u</sub>               | -0.490                                  | -0.665 | 0.994 | -0.668 | 0.993 | -0.668 | 0.993 |  |
| 2E <sub>g</sub>               | -0.357                                  | -0.409 | 0.998 | -0.413 | 0.998 | -0.413 | 0.998 |  |
| 2E <sub>g</sub>               | -0.339                                  | -0.398 | 0.998 | -0.402 | 0.997 | -0.402 | 0.997 |  |
| 2A <sub>g</sub>               | -0.328                                  | -0.368 | 0.998 | -0.373 | 0.998 | -0.372 | 0.998 |  |
| 2A <sub>u</sub>               | -0.306                                  | -0.585 | 0.990 | -0.584 | 0.988 | -0.584 | 0.988 |  |
| 2A <sub>g</sub>               | -0.153                                  | -0.485 | 0.988 | -0.479 | 0.987 | -0.480 | 0.987 |  |
| 2E <sub>g</sub>               | 0.027                                   | -0.226 | 0.991 | -0.234 | 0.989 | -0.234 | 0.989 |  |
| 2E <sub>g</sub>               | 0.088                                   | -0.178 | 0.990 | -0.185 | 0.989 | -0.184 | 0.989 |  |

Table S14. VEEs (eV) for Na(9-Crown-3)<sub>2</sub> at the KT, D2, P3, and P3+ levels of theory with the H: d-aug-cc-pVDZ, Na,C,O: cc-pVDZ basis set. The states are ordered according to P3+ excitation energies.

| Approximate Superatomic orbital | Final State (S <sub>6</sub> ) | VEE (eV) |       |       |       |
|---------------------------------|-------------------------------|----------|-------|-------|-------|
|                                 |                               | KT       | D2    | P3    | P3+   |
| 1S                              | 1 <sup>2</sup> A <sub>g</sub> | 0.000    | 0.000 | 0.000 | 0.000 |
| 1P                              | 1 <sup>2</sup> A <sub>u</sub> | 0.118    | 0.120 | 0.122 | 0.122 |
| 1P                              | 1 <sup>2</sup> E <sub>u</sub> | 0.180    | 0.216 | 0.215 | 0.215 |
| 1D                              | 2 <sup>2</sup> A <sub>g</sub> | 0.354    | 0.358 | 0.363 | 0.362 |
| 1D                              | 1 <sup>2</sup> E <sub>g</sub> | 0.467    | 0.545 | 0.544 | 0.543 |
| 1D                              | 2 <sup>2</sup> E <sub>g</sub> | 0.526    | 0.627 | 0.626 | 0.626 |
| 1F                              | 2 <sup>2</sup> A <sub>u</sub> | 0.799    | 0.907 | 0.910 | 0.910 |
| 1F                              | 2 <sup>2</sup> E <sub>u</sub> | 0.812    | 0.925 | 0.928 | 0.927 |
| 1F                              | 3 <sup>2</sup> E <sub>u</sub> | 0.864    | 1.003 | 1.004 | 1.004 |
| 2S                              | 3 <sup>2</sup> A <sub>g</sub> | 1.014    | 1.067 | 1.074 | 1.074 |
| 1F                              | 3 <sup>2</sup> A <sub>u</sub> | 0.939    | 1.103 | 1.107 | 1.106 |
| 1F                              | 4 <sup>2</sup> A <sub>u</sub> | 1.002    | 1.131 | 1.135 | 1.135 |
| 2P                              | 4 <sup>2</sup> E <sub>u</sub> | 1.148    | 1.202 | 1.207 | 1.207 |
| 2D                              | 4 <sup>2</sup> A <sub>g</sub> | 1.465    | 1.348 | 1.364 | 1.363 |
| 2P                              | 5 <sup>2</sup> A <sub>u</sub> | 1.471    | 1.400 | 1.411 | 1.410 |
| 1G                              | 3 <sup>2</sup> E <sub>g</sub> | 1.237    | 1.411 | 1.416 | 1.416 |
| 1G                              | 4 <sup>2</sup> E <sub>g</sub> | 1.261    | 1.428 | 1.432 | 1.432 |
| 1G                              | 5 <sup>2</sup> A <sub>g</sub> | 1.282    | 1.470 | 1.475 | 1.474 |
| 2D                              | 5 <sup>2</sup> E <sub>g</sub> | 1.672    | 1.653 | 1.654 | 1.654 |
| 2D                              | 6 <sup>2</sup> E <sub>g</sub> | 1.742    | 1.706 | 1.707 | 1.707 |

Table S15. Vertical electron attachment energies (VEAE) and pole strengths (PS) of Na(9-Crown-3)<sub>2</sub><sup>2+</sup> at Na(9-Crown-3)<sub>2</sub> CAM-B3LYP geometry, from electron propagator methods using the H: d-aug-cc-pVDZ, Na,C,O: cc-pVDZ basis set. All valence electrons correlated.

| Final State (S <sub>6</sub> ) | Na(9-Crown-3) <sub>2</sub> <sup>2+</sup> |        |       |        |       |        |       |  |
|-------------------------------|------------------------------------------|--------|-------|--------|-------|--------|-------|--|
|                               | KT                                       |        | D2    |        | P3    |        | P3+   |  |
|                               | VEAE                                     | VEAE   | PS    | VEAE   | PS    | VEAE   | PS    |  |
| 2A <sub>g</sub>               | -1.609                                   | -1.839 | 0.991 | -1.848 | 0.990 | -1.847 | 0.990 |  |
| 2A <sub>u</sub>               | -1.491                                   | -1.719 | 0.991 | -1.726 | 0.990 | -1.725 | 0.990 |  |
| 2E <sub>u</sub>               | -1.429                                   | -1.623 | 0.993 | -1.633 | 0.991 | -1.632 | 0.991 |  |
| 2A <sub>g</sub>               | -1.255                                   | -1.481 | 0.992 | -1.485 | 0.990 | -1.485 | 0.990 |  |
| 2E <sub>g</sub>               | -1.142                                   | -1.294 | 0.994 | -1.304 | 0.993 | -1.304 | 0.993 |  |
| 2E <sub>g</sub>               | -1.083                                   | -1.212 | 0.995 | -1.222 | 0.994 | -1.221 | 0.994 |  |
| 2A <sub>u</sub>               | -0.810                                   | -0.932 | 0.995 | -0.938 | 0.994 | -0.937 | 0.995 |  |
| 2E <sub>u</sub>               | -0.797                                   | -0.914 | 0.996 | -0.920 | 0.995 | -0.920 | 0.995 |  |
| 2E <sub>u</sub>               | -0.745                                   | -0.836 | 0.997 | -0.844 | 0.996 | -0.843 | 0.996 |  |
| 2A <sub>u</sub>               | -0.670                                   | -0.736 | 0.998 | -0.741 | 0.997 | -0.741 | 0.997 |  |
| 2A <sub>u</sub>               | -0.607                                   | -0.708 | 0.996 | -0.713 | 0.995 | -0.712 | 0.995 |  |
| 2A <sub>g</sub>               | -0.595                                   | -0.772 | 0.993 | -0.774 | 0.992 | -0.773 | 0.992 |  |
| 2E <sub>u</sub>               | -0.461                                   | -0.637 | 0.994 | -0.641 | 0.992 | -0.640 | 0.993 |  |
| 2E <sub>g</sub>               | -0.372                                   | -0.428 | 0.998 | -0.432 | 0.997 | -0.431 | 0.997 |  |
| 2E <sub>g</sub>               | -0.348                                   | -0.411 | 0.998 | -0.416 | 0.997 | -0.415 | 0.997 |  |
| 2A <sub>g</sub>               | -0.327                                   | -0.369 | 0.998 | -0.373 | 0.998 | -0.373 | 0.998 |  |
| 2A <sub>g</sub>               | -0.144                                   | -0.491 | 0.988 | -0.484 | 0.986 | -0.484 | 0.986 |  |
| 2A <sub>u</sub>               | -0.138                                   | -0.439 | 0.989 | -0.437 | 0.987 | -0.437 | 0.988 |  |
| 2E <sub>g</sub>               | 0.063                                    | -0.186 | 0.991 | -0.194 | 0.989 | -0.193 | 0.989 |  |
| 2E <sub>g</sub>               | 0.133                                    | -0.133 | 0.990 | -0.141 | 0.989 | -0.140 | 0.989 |  |

Table S16. VEEs (eV) for Li[2.1.1]Cryptand at the KT, D2, P3, and P3+ levels of theory with the H: d-aug-cc-pVDZ, Li,C,O,N: cc-pVDZ basis set. The states are ordered according to P3+ excitation energies.

| Approximate Superatomic orbital | Final State (C <sub>2</sub> ) | VEE (eV) |       |       |       |
|---------------------------------|-------------------------------|----------|-------|-------|-------|
|                                 |                               | KT       | D2    | P3    | P3+   |
| 1S                              | 1 <sup>2</sup> A              | 0.000    | 0.000 | 0.000 | 0.000 |
| 1P                              | 2 <sup>2</sup> A              | 0.136    | 0.148 | 0.149 | 0.148 |
| 1P                              | 1 <sup>2</sup> B              | 0.162    | 0.188 | 0.189 | 0.188 |
| 1P                              | 2 <sup>2</sup> B              | 0.198    | 0.248 | 0.245 | 0.245 |
| 1D                              | 3 <sup>2</sup> A              | 0.452    | 0.532 | 0.530 | 0.530 |
| 1D                              | 4 <sup>2</sup> A              | 0.453    | 0.533 | 0.531 | 0.531 |
| 1D                              | 5 <sup>2</sup> A              | 0.470    | 0.548 | 0.547 | 0.547 |
| 1D                              | 3 <sup>2</sup> B              | 0.490    | 0.590 | 0.589 | 0.589 |
| 1D                              | 4 <sup>2</sup> B              | 0.502    | 0.603 | 0.602 | 0.601 |
| 1F                              | 6 <sup>2</sup> A              | 0.824    | 0.953 | 0.954 | 0.953 |
| 1F                              | 5 <sup>2</sup> B              | 0.833    | 0.974 | 0.973 | 0.972 |
| 1F                              | 7 <sup>2</sup> A              | 0.856    | 0.996 | 0.997 | 0.997 |
| 1F                              | 6 <sup>2</sup> B              | 0.863    | 1.012 | 1.012 | 1.011 |
| 1F                              | 8 <sup>2</sup> A              | 0.875    | 1.024 | 1.025 | 1.025 |
| 1F                              | 7 <sup>2</sup> B              | 0.878    | 1.024 | 1.026 | 1.025 |
| 1F                              | 9 <sup>2</sup> A              | 0.895    | 1.057 | 1.057 | 1.057 |

Table S17. Vertical electron attachment energies (VEAE) and pole strengths (PS) of Li[2.1.1]Cryptand<sup>+</sup> at Li[2.1.1]Cryptand CAM-B3LYP geometry, from electron propagator methods using the H: d-aug-cc-pVDZ, Li,C,O,N: cc-pVDZ basis set. All valence electrons correlated.

| Final State (C <sub>2</sub> ) | Li[2.1.1]Cryptand <sup>+</sup> |        |       |        |       |        |       |  |
|-------------------------------|--------------------------------|--------|-------|--------|-------|--------|-------|--|
|                               | KT                             |        | D2    |        | P3    |        | P3+   |  |
|                               | VEAE                           | VEAE   | PS    | VEAE   | PS    | VEAE   | PS    |  |
| 2A                            | -1.609                         | -1.868 | 0.990 | -1.875 | 0.988 | -1.874 | 0.988 |  |
| 2A                            | -1.473                         | -1.720 | 0.991 | -1.726 | 0.989 | -1.726 | 0.989 |  |
| 2B                            | -1.447                         | -1.680 | 0.991 | -1.686 | 0.990 | -1.686 | 0.990 |  |
| 2B                            | -1.411                         | -1.620 | 0.992 | -1.630 | 0.990 | -1.629 | 0.990 |  |
| 2A                            | -1.157                         | -1.336 | 0.993 | -1.345 | 0.992 | -1.344 | 0.992 |  |
| 2A                            | -1.156                         | -1.335 | 0.993 | -1.344 | 0.992 | -1.343 | 0.992 |  |
| 2A                            | -1.139                         | -1.320 | 0.993 | -1.328 | 0.992 | -1.327 | 0.992 |  |
| 2B                            | -1.119                         | -1.278 | 0.994 | -1.286 | 0.993 | -1.285 | 0.993 |  |
| 2B                            | -1.107                         | -1.265 | 0.994 | -1.273 | 0.993 | -1.273 | 0.993 |  |
| 2A                            | -0.785                         | -0.915 | 0.995 | -0.921 | 0.994 | -0.921 | 0.994 |  |
| 2B                            | -0.776                         | -0.894 | 0.995 | -0.902 | 0.994 | -0.902 | 0.994 |  |
| 2A                            | -0.753                         | -0.872 | 0.995 | -0.878 | 0.994 | -0.877 | 0.995 |  |
| 2B                            | -0.746                         | -0.856 | 0.996 | -0.863 | 0.995 | -0.863 | 0.995 |  |
| 2A                            | -0.734                         | -0.844 | 0.996 | -0.850 | 0.995 | -0.849 | 0.995 |  |
| 2B                            | -0.731                         | -0.844 | 0.996 | -0.849 | 0.995 | -0.849 | 0.995 |  |
| 2A                            | -0.714                         | -0.811 | 0.996 | -0.818 | 0.995 | -0.817 | 0.996 |  |

Table S18. VEEs (eV) for Na[2.1.1]Cryptand at the KT, D2, P3, and P3+ levels of theory with the H: d-aug-cc-pVDZ, Na,C,O,N: cc-pVDZ basis set. The states are ordered according to P3+ excitation energies.

| Approximate Superatomic orbital | Final State (C <sub>2</sub> ) | VEE (eV) |       |       |       |
|---------------------------------|-------------------------------|----------|-------|-------|-------|
|                                 |                               | KT       | D2    | P3    | P3+   |
| 1S                              | 1 <sup>2</sup> A              | 0.000    | 0.000 | 0.000 | 0.000 |
| 1P                              | 2 <sup>2</sup> A              | 0.131    | 0.144 | 0.144 | 0.144 |
| 1P                              | 1 <sup>2</sup> B              | 0.157    | 0.180 | 0.180 | 0.179 |
| 1P                              | 2 <sup>2</sup> B              | 0.199    | 0.252 | 0.250 | 0.250 |
| 1D                              | 3 <sup>2</sup> A              | 0.442    | 0.521 | 0.519 | 0.519 |
| 1D                              | 4 <sup>2</sup> A              | 0.442    | 0.522 | 0.519 | 0.519 |
| 1D                              | 5 <sup>2</sup> A              | 0.466    | 0.545 | 0.544 | 0.543 |
| 1D                              | 3 <sup>2</sup> B              | 0.488    | 0.589 | 0.588 | 0.587 |
| 1D                              | 4 <sup>2</sup> B              | 0.504    | 0.608 | 0.607 | 0.607 |
| 1F                              | 6 <sup>2</sup> A              | 0.811    | 0.939 | 0.939 | 0.938 |
| 1F                              | 5 <sup>2</sup> B              | 0.820    | 0.958 | 0.957 | 0.956 |
| 1F                              | 7 <sup>2</sup> A              | 0.847    | 0.985 | 0.986 | 0.986 |
| 1F                              | 6 <sup>2</sup> B              | 0.856    | 1.005 | 1.005 | 1.004 |
| 1F                              | 7 <sup>2</sup> B              | 0.871    | 1.016 | 1.018 | 1.018 |
| 1F                              | 8 <sup>2</sup> A              | 0.873    | 1.023 | 1.024 | 1.023 |
| 1F                              | 9 <sup>2</sup> A              | 0.893    | 1.055 | 1.056 | 1.055 |

Table S19. Vertical electron attachment energies (VEAE) and pole strengths (PS) of Na[2.1.1]Cryptand<sup>+</sup> at Na[2.1.1]Cryptand CAM-B3LYP geometry, from electron propagator methods using the H: d-aug-cc-pVDZ, Na,C,O,N: cc-pVDZ basis set. All valence electrons correlated.

| Final State (C <sub>2</sub> ) | Na[2.1.1]Cryptand <sup>+</sup> |        |       |        |       |        |       |  |
|-------------------------------|--------------------------------|--------|-------|--------|-------|--------|-------|--|
|                               | KT                             |        | D2    |        | P3    |        | P3+   |  |
|                               | VEAE                           | VEAE   | PS    | VEAE   | PS    | VEAE   | PS    |  |
| <sup>2</sup> A                | -1.600                         | -1.859 | 0.990 | -1.866 | 0.988 | -1.865 | 0.988 |  |
| <sup>2</sup> A                | -1.469                         | -1.715 | 0.991 | -1.722 | 0.989 | -1.721 | 0.989 |  |
| <sup>2</sup> B                | -1.443                         | -1.679 | 0.991 | -1.686 | 0.989 | -1.686 | 0.989 |  |
| <sup>2</sup> B                | -1.401                         | -1.607 | 0.992 | -1.616 | 0.990 | -1.615 | 0.990 |  |
| <sup>2</sup> A                | -1.158                         | -1.338 | 0.993 | -1.347 | 0.992 | -1.346 | 0.992 |  |
| <sup>2</sup> A                | -1.158                         | -1.337 | 0.993 | -1.347 | 0.992 | -1.346 | 0.992 |  |
| <sup>2</sup> A                | -1.134                         | -1.314 | 0.993 | -1.322 | 0.992 | -1.322 | 0.992 |  |
| <sup>2</sup> B                | -1.112                         | -1.270 | 0.994 | -1.278 | 0.993 | -1.278 | 0.993 |  |
| <sup>2</sup> B                | -1.096                         | -1.251 | 0.994 | -1.259 | 0.993 | -1.258 | 0.993 |  |
| <sup>2</sup> A                | -0.789                         | -0.920 | 0.995 | -0.927 | 0.994 | -0.927 | 0.994 |  |
| <sup>2</sup> B                | -0.780                         | -0.901 | 0.995 | -0.909 | 0.994 | -0.909 | 0.994 |  |
| <sup>2</sup> A                | -0.753                         | -0.874 | 0.995 | -0.880 | 0.994 | -0.879 | 0.994 |  |
| <sup>2</sup> B                | -0.744                         | -0.854 | 0.996 | -0.861 | 0.995 | -0.861 | 0.995 |  |
| <sup>2</sup> B                | -0.729                         | -0.843 | 0.996 | -0.848 | 0.995 | -0.847 | 0.995 |  |
| <sup>2</sup> A                | -0.727                         | -0.836 | 0.996 | -0.842 | 0.995 | -0.842 | 0.995 |  |
| <sup>2</sup> A                | -0.707                         | -0.804 | 0.996 | -0.810 | 0.995 | -0.810 | 0.995 |  |

Table S20. VEEs (eV) for Li(*o*-Me<sub>2</sub>-1.1.1) at the D2 level of theory with the H: d-aug-cc-pVDZ, Li,C,O: cc-pVDZ basis set.

| Approximate Superatomic orbital | Final State (C <sub>3h</sub> ) | VEE (eV) |
|---------------------------------|--------------------------------|----------|
| 1S                              | 1 <sup>2</sup> A'              | 0.000    |
| 1P                              | 1 <sup>2</sup> A''             | 0.153    |
| 1P                              | 1 <sup>2</sup> E'              | 0.181    |
| 1D                              | 1 <sup>2</sup> E''             | 0.459    |
| 1D                              | 2 <sup>2</sup> A'              | 0.490    |
| 1D                              | 2 <sup>2</sup> E'              | 0.515    |
| 1F                              | 3 <sup>2</sup> E'              | 0.866    |
| 1F                              | 2 <sup>2</sup> A''             | 0.873    |
| 1F                              | 3 <sup>2</sup> A'              | 0.875    |
| 1F                              | 2 <sup>2</sup> E''             | 0.878    |
| 1F                              | 4 <sup>2</sup> A'              | 0.934    |

Table S21. Vertical electron attachment energies (VEAE) and pole strengths (PS) of Li(*o*-Me<sub>2</sub>-1.1.1)<sup>+</sup> at Li(*o*-Me<sub>2</sub>-1.1.1) CAM-B3LYP geometry, from D2 electron propagator method using the H: d-aug-cc-pVDZ, Li,C,O: cc-pVDZ basis set. All valence electrons correlated.

| Final State (C <sub>3h</sub> ) | VEAE   | PS    |
|--------------------------------|--------|-------|
| 2 <sup>2</sup> A'              | -1.722 | 0.991 |
| 2 <sup>2</sup> A''             | -1.569 | 0.992 |
| 2 <sup>2</sup> E'              | -1.541 | 0.992 |
| 2 <sup>2</sup> E''             | -1.263 | 0.994 |
| 2 <sup>2</sup> A'              | -1.232 | 0.994 |
| 2 <sup>2</sup> E'              | -1.207 | 0.994 |
| 2 <sup>2</sup> E'              | -0.856 | 0.996 |
| 2 <sup>2</sup> A''             | -0.849 | 0.996 |
| 2 <sup>2</sup> E''             | -0.844 | 0.996 |
| 2 <sup>2</sup> A'              | -0.847 | 0.995 |
| 2 <sup>2</sup> A'              | -0.788 | 0.996 |

Table S22. VEEs (eV) for Na(*o*-Me<sub>2</sub>-1.1.1) at the D2 level of theory with the H: d-aug-cc-pVDZ, Na,C,O: cc-pVDZ basis set.

| Approximate Superatomic orbital | Final State (C <sub>3h</sub> ) | VEE (eV) |
|---------------------------------|--------------------------------|----------|
| 1S                              | 1 <sup>2</sup> A'              | 0.000    |
| 1P                              | 1 <sup>2</sup> E'              | 0.168    |
| 1P                              | 1 <sup>2</sup> A''             | 0.187    |
| 1D                              | 1 <sup>2</sup> E''             | 0.473    |
| 1D                              | 2 <sup>2</sup> A'              | 0.498    |
| 1D                              | 2 <sup>2</sup> E'              | 0.503    |
| 1F                              | 3 <sup>2</sup> A'              | 0.858    |
| 1F                              | 3 <sup>2</sup> E'              | 0.872    |
| 1F                              | 2 <sup>2</sup> A''             | 0.881    |
| 1F                              | 2 <sup>2</sup> E''             | 0.882    |
| 1F                              | 4 <sup>2</sup> A'              | 0.930    |

Table S23. Vertical electron attachment energies (VEAE) and pole strengths (PS) of Na(*o*-Me<sub>2</sub>-1.1.1)<sup>+</sup> at Na(*o*-Me<sub>2</sub>-1.1.1) CAM-B3LYP geometry, from D2 electron propagator method using the H: d-aug-cc-pVDZ, Na,C,O: cc-pVDZ basis set. All valence electrons correlated.

| Final State (C <sub>3h</sub> ) | VEAE   | PS    |
|--------------------------------|--------|-------|
| <sup>2</sup> A'                | -1.723 | 0.991 |
| <sup>2</sup> E'                | -1.555 | 0.992 |
| <sup>2</sup> A''               | -1.536 | 0.992 |
| <sup>2</sup> E''               | -1.250 | 0.994 |
| <sup>2</sup> E'                | -1.220 | 0.994 |
| <sup>2</sup> A'                | -1.225 | 0.994 |
| <sup>2</sup> E'                | -0.851 | 0.996 |
| <sup>2</sup> E''               | -0.841 | 0.996 |
| <sup>2</sup> A''               | -0.842 | 0.996 |
| <sup>2</sup> A'                | -0.865 | 0.994 |
| <sup>2</sup> A'                | -0.793 | 0.996 |

Table S24. VEEs (eV) for Na([24]Crown-8) at the D2 level of theory with the H: d-aug-cc-pVDZ, Na,C,O: cc-pVDZ basis sets.

| Approximate Superatomic orbital | Final State (S <sub>4</sub> ) | VEE (eV) |
|---------------------------------|-------------------------------|----------|
| 1S                              | 1 <sup>2</sup> A              | 0.000    |
| 1P                              | 1 <sup>2</sup> E              | 0.149    |
| 1P                              | 1 <sup>2</sup> B              | 0.203    |
| 1D                              | 2 <sup>2</sup> B              | 0.403    |
| 1D                              | 2 <sup>2</sup> A              | 0.489    |
| 1D                              | 2 <sup>2</sup> E              | 0.494    |
| 1D                              | 3 <sup>2</sup> B              | 0.507    |
| 1F                              | 3 <sup>2</sup> A              | 0.842    |
| 1F                              | 3 <sup>2</sup> E              | 0.863    |
| 1F                              | 4 <sup>2</sup> A              | 0.892    |
| 1F                              | 4 <sup>2</sup> E              | 0.901    |
| 1F                              | 4 <sup>2</sup> B              | 0.917    |

Table S25. Vertical electron attachment energies (VEAE) and pole strengths (PS) of Na([24]Crown-8)<sup>+</sup> at Na([24]Crown-8) CAM-B3LYP geometry, from D2 electron propagator method using the H: d-aug-cc-pVDZ, Na,C,O: cc-pVDZ basis set. All valence electrons correlated.

| Final State (S <sub>4</sub> ) | VEAE   | PS    |
|-------------------------------|--------|-------|
| <sup>2</sup> A                | -1.731 | 0.991 |
| <sup>2</sup> E                | -1.582 | 0.992 |
| <sup>2</sup> B                | -1.528 | 0.993 |
| <sup>2</sup> B                | -1.328 | 0.993 |
| <sup>2</sup> A                | -1.242 | 0.994 |
| <sup>2</sup> E                | -1.237 | 0.994 |
| <sup>2</sup> B                | -1.224 | 0.994 |
| <sup>2</sup> A                | -0.889 | 0.995 |
| <sup>2</sup> E                | -0.868 | 0.995 |
| <sup>2</sup> A                | -0.839 | 0.996 |
| <sup>2</sup> E                | -0.830 | 0.996 |
| <sup>2</sup> B                | -0.814 | 0.996 |

Table S26. VEEs (eV) for K([24]Crown-8) at the D2 level of theory with the H: d-aug-cc-pVDZ, K,C,O: cc-pVDZ basis set.

| Approximate Superatomic orbital | Final State (S <sub>4</sub> ) | VEE (eV) |
|---------------------------------|-------------------------------|----------|
| 1S                              | <sup>1</sup> 2A               | 0.000    |
| 1P                              | <sup>1</sup> 2E               | 0.139    |
| 1P                              | <sup>1</sup> 2B               | 0.171    |
| 1D                              | <sup>2</sup> 2B               | 0.370    |
| 1D                              | <sup>2</sup> 2A               | 0.458    |
| 1D                              | <sup>3</sup> 2B               | 0.461    |
| 1D                              | <sup>2</sup> 2E               | 0.468    |
| 1F                              | <sup>3</sup> 2A               | 0.791    |
| 1F                              | <sup>3</sup> 2E               | 0.793    |
| 1F                              | <sup>4</sup> 2A               | 0.832    |
| 1F                              | <sup>4</sup> 2E               | 0.861    |
| 1F                              | <sup>4</sup> 2B               | 0.883    |

Table S27. Vertical electron attachment energies (VEAE) and pole strengths (PS) of K([24]Crown-8)<sup>+</sup> at K([24]Crown-8) CAM-B3LYP geometry, from D2 electron propagator method using the H: d-aug-cc-pVDZ, K,C,O: cc-pVDZ basis set. All valence electrons correlated.

| Final State (S <sub>4</sub> ) | VEAE   | PS    |
|-------------------------------|--------|-------|
| <sup>2</sup> A                | -1.669 | 0.991 |
| <sup>2</sup> E                | -1.530 | 0.992 |
| <sup>2</sup> B                | -1.498 | 0.993 |
| <sup>2</sup> B                | -1.299 | 0.993 |
| <sup>2</sup> B                | -1.208 | 0.994 |
| <sup>2</sup> A                | -1.211 | 0.994 |
| <sup>2</sup> E                | -1.201 | 0.994 |
| <sup>2</sup> E                | -0.876 | 0.995 |
| <sup>2</sup> A                | -0.878 | 0.995 |
| <sup>2</sup> A                | -0.837 | 0.996 |
| <sup>2</sup> E                | -0.808 | 0.996 |
| <sup>2</sup> B                | -0.786 | 0.996 |

Table S28. VEEs (eV) for Li[3<sup>6</sup>adamanzane] at the D2 level of theory with the H: d-aug-cc-pVDZ, Li,C,N: cc-pVDZ basis set.

| Approximate Superatomic orbital | Final State (S <sub>4</sub> ) | VEE (eV) |
|---------------------------------|-------------------------------|----------|
| 1S                              | 1 <sup>2</sup> A              | 0.000    |
| 1P                              | 1 <sup>2</sup> B              | 0.143    |
| 1P                              | 1 <sup>2</sup> E              | 0.153    |
| 1D                              | 2 <sup>2</sup> B              | 0.516    |
| 1D                              | 2 <sup>2</sup> E              | 0.518    |
| 1D                              | 2 <sup>2</sup> A              | 0.565    |
| 1D                              | 3 <sup>2</sup> B              | 0.566    |
| 1F                              | 3 <sup>2</sup> A              | 0.949    |
| 1F                              | 3 <sup>2</sup> E              | 0.982    |
| 1F                              | 4 <sup>2</sup> A              | 0.987    |
| 1F                              | 4 <sup>2</sup> B              | 0.989    |
| 1F                              | 4 <sup>2</sup> E              | 0.995    |



Table S29. Vertical electron attachment energies (VEAE) and pole strengths (PS) of Li[3<sup>6</sup>adamanzane]<sup>+</sup> at Li[3<sup>6</sup>adamanzane] CAM-B3LYP geometry, from D2 electron propagator method using the H: d-aug-cc-pVDZ, Li,C,N: cc-pVDZ basis set. All valence electrons correlated.

| Final State (S <sub>4</sub> ) | VEAE   | PS    |
|-------------------------------|--------|-------|
| <sup>2</sup> A                | -1.865 | 0.988 |
| <sup>2</sup> B                | -1.722 | 0.989 |
| <sup>2</sup> E                | -1.712 | 0.989 |
| <sup>2</sup> E                | -1.347 | 0.992 |
| <sup>2</sup> B                | -1.349 | 0.992 |
| <sup>2</sup> B                | -1.299 | 0.993 |
| <sup>2</sup> A                | -1.300 | 0.993 |
| <sup>2</sup> A                | -0.916 | 0.994 |
| <sup>2</sup> E                | -0.883 | 0.995 |
| <sup>2</sup> A                | -0.878 | 0.995 |
| <sup>2</sup> E                | -0.870 | 0.995 |
| <sup>2</sup> B                | -0.876 | 0.995 |

Table S30. Point group symmetries, bond distances, and average 1S → 1P, 1S → 1D, and 1S → 1F EPT VEE (eV) of the complexes reported in the present work.

| Structure                                 | Bond lengths  |       |             | Average 1S → 1P VEE |       |       | Average 1S → 1D VEE |       |       | Average 1S → 1F VEE |       |       |
|-------------------------------------------|---------------|-------|-------------|---------------------|-------|-------|---------------------|-------|-------|---------------------|-------|-------|
|                                           | M-O           | M-N   | C-H         | D2                  | P3    | P3+   | D2                  | P3    | P3+   | D2                  | P3    | P3+   |
| Li(9-Crown-3)                             | 2.076         |       | 1.088-1.093 |                     |       |       |                     |       |       |                     |       |       |
| Na(9-Crown-3)                             | 2.569         |       | 1.089-1.095 |                     |       |       |                     |       |       |                     |       |       |
| Li(9-Crown-3) <sub>2</sub>                | 2.078         |       | 1.087-1.093 | 0.194               | 0.194 | 0.193 | 0.569               | 0.570 | 0.570 | 1.043               | 1.046 | 1.045 |
| Li(9-Crown-3) <sub>2</sub> <sup>+</sup>   | 2.087         |       | 1.087-1.091 |                     |       |       |                     |       |       |                     |       |       |
| Na(9-Crown-3) <sub>2</sub>                | 2.366         |       | 1.089-1.093 | 0.184               | 0.184 | 0.184 | 0.540               | 0.541 | 0.540 | 1.000               | 1.002 | 1.002 |
| Na(9-Crown-3) <sub>2</sub> <sup>+</sup>   | 2.376         |       | 1.089-1.093 |                     |       |       |                     |       |       |                     |       |       |
| Li[2.1.1]Cryptand                         | 2.091, 2.148  | 2.259 | 1.087-1.099 | 0.195               | 0.194 | 0.194 | 0.561               | 0.560 | 0.560 | 1.006               | 1.006 | 1.006 |
| Li[2.1.1]Cryptand <sup>+</sup>            | 2.076, 2.112  | 2.307 | 1.087-1.098 |                     |       |       |                     |       |       |                     |       |       |
| Na[2.1.1]Cryptand                         | 2.248, 2.278  | 2.313 | 1.088-1.101 | 0.192               | 0.191 | 0.191 | 0.557               | 0.555 | 0.555 | 0.997               | 0.998 | 0.997 |
| Na[2.1.1]Cryptand <sup>+</sup>            | 2.256, 2.290  | 2.380 | 1.088-1.098 |                     |       |       |                     |       |       |                     |       |       |
| Li(o-Me <sub>2</sub> -1.1.1)              | 2.435, 2.706, |       | 1.098-1.106 | 0.172               |       |       | 0.488               |       |       | 0.881               |       |       |
| Li(o-Me <sub>2</sub> -1.1.1) <sup>+</sup> | 2.441, 2.715  |       | 1.096-1.105 |                     |       |       |                     |       |       |                     |       |       |
| Na(o-Me <sub>2</sub> -1.1.1)              | 2.565, 2.581  |       | 1.098-1.106 | 0.174               |       |       | 0.490               |       |       | 0.882               |       |       |
| Na(o-Me <sub>2</sub> -1.1.1) <sup>+</sup> | 2.575, 2.586  |       | 1.097-1.104 |                     |       |       |                     |       |       |                     |       |       |
| Na(24-Crown-8)                            | 2.505         |       | 1.097-1.106 | 0.167               |       |       | 0.477               |       |       | 0.883               |       |       |
| Na(24-Crown-8) <sup>+</sup>               | 2.498, 2.542  |       | 1.097-1.105 |                     |       |       |                     |       |       |                     |       |       |
| K(24-Crown-8)                             | 2.766, 2.875  |       | 1.099-1.105 | 0.150               |       |       | 0.445               |       |       | 0.831               |       |       |
| K(24-Crown-8) <sup>+</sup>                | 2.801, 2.871  |       | 1.098-1.105 |                     |       |       |                     |       |       |                     |       |       |
| Li(3 <sup>6</sup> Adz)                    |               | 1.964 | 1.097-1.109 | 0.150               |       |       | 0.537               |       |       | 0.983               |       |       |
| Li(3 <sup>6</sup> Adz) <sup>+</sup>       |               | 1.964 | 1.097-1.107 |                     |       |       |                     |       |       |                     |       |       |

Table S31. Total number of H atoms in the solvation shell, EPT (D2/P3+) VIE (eV), and average 1S → 1P and 1S → 1D EPT (D2/P3+) VEE (eV), and  $\Sigma r_{(M \cdots H)}$  (Å) of the Rydberg-type complexes collected from literature.

| Species                                | No of H atoms | Method | Basis set <sup>a</sup> |      | EPT VIE | EPT 1S → 1P VEE | EPT 1S → 1D VEE | $\Sigma r_{(M \cdots H)}$ | Reference |
|----------------------------------------|---------------|--------|------------------------|------|---------|-----------------|-----------------|---------------------------|-----------|
|                                        |               |        | C, N, O, M=Li/Na/K     | H    |         |                 |                 |                           |           |
| Li(NH <sub>3</sub> ) <sub>4</sub>      | 12            | P3+    | TZ                     | DATZ | 2.837   | 0.719           | 1.412           | 31.759                    | 1         |
| Na(NH <sub>3</sub> ) <sub>4</sub>      | 12            | P3+    | TZ                     | DATZ | 2.711   | 0.656           | 1.329           | 36.272                    | 1         |
| Li(C <sub>20</sub> H <sub>20</sub> )   | 20            | P3+    | TZ                     | DATZ | 2.350   | 0.398           | 0.956           | 65.618                    | 2         |
| Na(C <sub>20</sub> H <sub>20</sub> )   | 20            | P3+    | TZ                     | DATZ | 2.270   | 0.382           | 0.878           | 66.049                    | 2         |
| Li(en) <sub>2</sub>                    | 16            | P3+    | TZ                     | DATZ | 2.478   | 0.458           | 1.042           | 36.130                    | 3         |
| Na(en) <sub>2</sub>                    | 16            | P3+    | TZ                     | DATZ | 2.453   | 0.484           | 1.047           | 55.605                    | 3         |
| K(en) <sub>2</sub>                     | 16            | P3+    | TZ                     | DATZ | 2.448   | 0.544           | 1.065           | -                         | 3         |
| Li(12-Crown-4)                         | 16            | P3+    | TZ                     | DATZ | 2.538   | -               | -               | 54.797                    | 3         |
| Li(15-Crown-5)                         | 20            | P3+    | DZ                     | DADZ | 1.957   | 0.221           | 0.626           | 74.385                    | 3         |
| Na(15-Crown-5)                         | 20            | P3+    | DZ                     | DADZ | 2.582   | -               | -               | 80.789                    | 3         |
| K(15-Crown-5)                          | 20            | P3+    | DZ                     | DADZ | 2.583   | -               | -               | -                         | 3         |
| Na(18-Crown-6)                         | 24            | P3+    | DZ                     | DADZ | 2.345   | -               | -               | 102.764                   | 3         |
| K(18-Crown-6)                          | 24            | P3+    | DZ                     | DADZ | 2.328   | -               | -               | -                         | 3         |
| Li([9]aneN <sub>3</sub> ) <sub>2</sub> | 30            | P3+    | DZ                     | DADZ | 2.093   | 0.313           | 0.729           | 104.251                   | 4         |
| Na([9]aneN <sub>3</sub> ) <sub>2</sub> | 30            | P3+    | DZ                     | DADZ | 2.063   | 0.311           | 0.721           | 110.947                   | 4         |
| Li[18]aneN <sub>6</sub>                | 30            | P3+    | DZ                     | DADZ | 2.142   | 0.345           | 0.780           | 105.800                   | 4         |
| Na[18]aneN <sub>6</sub>                | 30            | P3+    | DZ                     | DADZ | 2.138   | 0.352           | 0.787           | 108.954                   | 4         |
| Li[1.1.1]Cryptand                      | 24            | P3+    | DZ                     | DADZ | 1.948   | 0.182           | 0.593           | 80.383                    | 4         |
| Na[2.2.2]Cryptand                      | 36            | D2     | DZ                     | DADZ | 1.669   | 0.137           | 0.436           | 153.445                   | 4         |
| Na(Tren) <sub>2</sub>                  | 36            | P3+    | DZ                     | DADZ | 2.011   | 0.291           | 0.686           | 140.325                   | 5         |
| K(Tren) <sub>2</sub>                   | 36            | P3+    | DZ                     | DADZ | 1.959   | 0.282           | 0.659           | -                         | 5         |
| Na(Azacryptand)                        | 42            | P3+    | DZ                     | DADZ | 1.767   | 0.114           | 0.494           | 176.224                   | 5         |
| K(Azacryptand)                         | 42            | P3+    | DZ                     | DADZ | 1.751   | 0.100           | 0.485           | -                         | 5         |
| Na(TriPip222)                          | 48            | D2     | DZ                     | DADZ | 1.694   | 0.161           | 0.448           | 196.525                   | 5         |
| K(TriPip222)                           | 48            | D2     | DZ                     | DADZ | 1.680   | 0.156           | 0.442           | -                         | 5         |

<sup>a</sup> TZ = cc-pVTZ, DZ = cc-pVDZ, DATZ = d-aug-cc-pVTZ, DADZ = d-aug-cc-pVDZ

Table S32. CAM-B3LYP VIE (eV) and average TD-DFT 1S→1P and 1S→1D VEE (eV) of the Rydberg-type complexes. Structures were collected from references listed in Table S31.

| Complex                                | VIE   | Average 1S → 1P VEE | Average 1S → 1D VEE |
|----------------------------------------|-------|---------------------|---------------------|
| Li(NH <sub>3</sub> ) <sub>4</sub>      | 3.021 | 0.776               | 1.441               |
| Li(C <sub>20</sub> H <sub>20</sub> )   | 2.460 | 0.379               | 0.982               |
| Li(en) <sub>2</sub>                    | 2.621 | 0.489               | 1.057               |
| Li(12-Crown-4)                         | 2.684 | -                   | -                   |
| Li(15-Crown-5)                         | 2.077 | 0.236               | 0.607               |
| Li([9]aneN <sub>3</sub> ) <sub>2</sub> | 2.258 | 0.357               | 0.797               |
| Li[18]aneN <sub>6</sub>                | 2.306 | 0.422               | 0.874               |
| Li[1.1.1]Cryptand                      | 2.039 | 0.166               | 0.560               |
| Li(9-Crown-3) <sub>2</sub>             | 2.002 | 0.198               | 0.540               |
| Li[2.1.1]Cryptand                      | 1.965 | 0.192               | 0.549               |
| Li( <i>o</i> -Me <sub>2</sub> -1.1.1)  | 1.821 | 0.176               | 0.452               |
| Li(3 <sup>6</sup> adamanzane)          | 1.946 | 0.114               | 0.502               |
| Na(NH <sub>3</sub> ) <sub>4</sub>      | 2.915 | 0.735               | 1.384               |
| Na(C <sub>20</sub> H <sub>20</sub> )   | 2.372 | 0.394               | 0.895               |
| Na(en) <sub>2</sub>                    | 2.605 | 0.530               | 1.061               |
| Na(15-Crown-5)                         | 2.840 | -                   | -                   |
| Na(18-Crown-6)                         | 2.594 | -                   | -                   |
| Na([9]aneN <sub>3</sub> ) <sub>2</sub> | 2.225 | 0.356               | 0.785               |
| Na[18]aneN <sub>6</sub>                | 2.304 | 0.405               | 0.863               |
| Na[2.2.2]Cryptand                      | 1.760 | 0.132               | 0.399               |
| Na(Tren) <sub>2</sub>                  | 2.208 | 0.338               | 0.780               |
| Na(Azacrypt)                           | 1.894 | 0.163               | 0.546               |
| Na(TriPip222)                          | 1.784 | 0.157               | 0.431               |
| Na(9-Crown-3) <sub>2</sub>             | 1.958 | 0.193               | 0.510               |
| Na[2.1.1]Cryptand                      | 1.960 | 0.189               | 0.548               |
| Na( <i>o</i> -Me <sub>2</sub> -1.1.1)  | 1.822 | 0.178               | 0.455               |
| Na(24-Crown-8)                         | 1.835 | 0.171               | 0.446               |
| K(en) <sub>2</sub>                     | 2.633 | 0.630               | 1.118               |
| K(15-Crown-5)                          | 2.889 | -                   | -                   |
| K(18-Crown-6)                          | 2.571 | -                   | -                   |
| K(Tren) <sub>2</sub>                   | 2.145 | 0.334               | 0.736               |
| K(Azacrypt)                            | 1.883 | 0.152               | 0.540               |
| K(TriPip222)                           | 1.783 | 0.153               | 0.437               |
| K(24-Crown-8)                          | 1.775 | 0.154               | 0.409               |

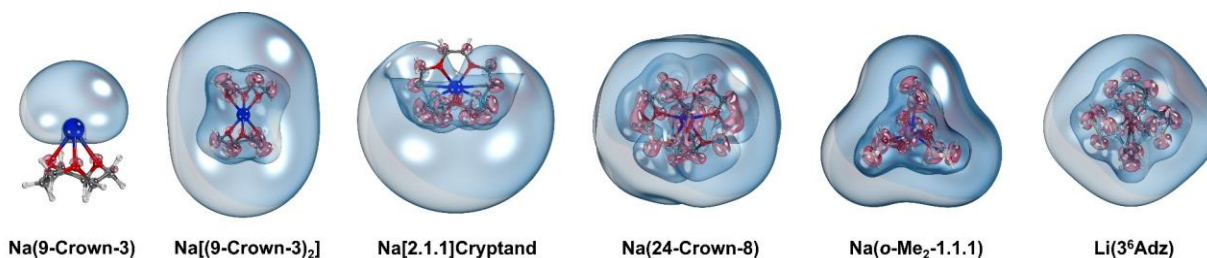

Figure S1. Contours of singly occupied molecular orbitals of Na(9-Crown-3)<sub>n=1,2</sub>, Na[2.1.1]Cryptand, Na(24-Crown-8), Na(o-Me<sub>2</sub>-1.1.1), and Li(3<sup>6</sup>Adz) complexes. A threshold of 70% was applied for the contours. Molecular orbitals of corresponding Li- or K-complexes have similar shapes.

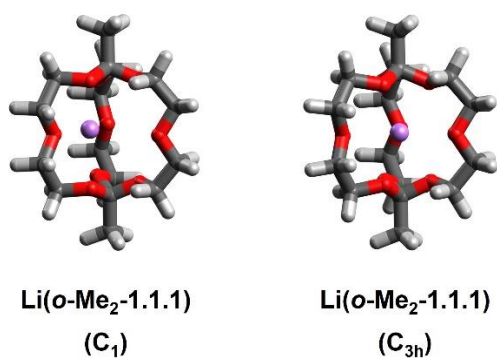

Figure S2. C<sub>1</sub> and C<sub>3h</sub> geometries of Li(o-Me<sub>2</sub>-1.1.1).

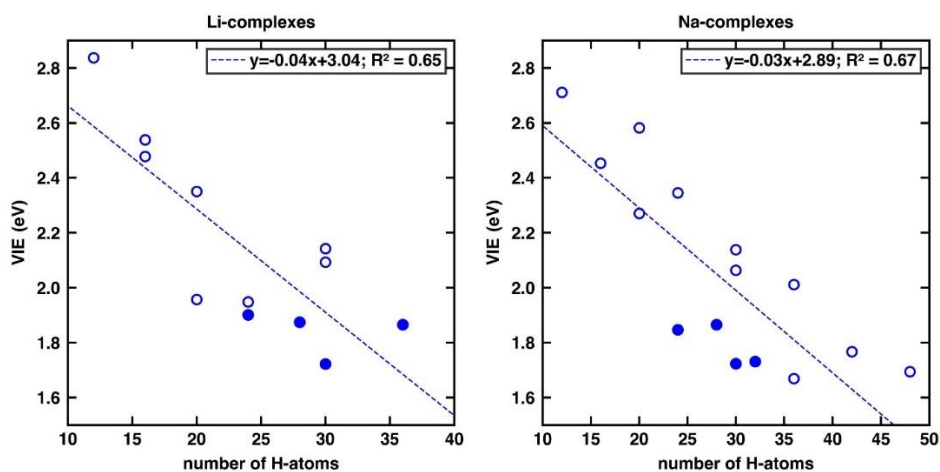

Figure S3. EPT VIE (eV) vs. number of H-atoms in the solvation shell of Li- and Na-complexes. The open circles correspond to the literature values, whereas the closed circles represent the values report in the present work. The literature EPT VIEs and the number of H-atoms of corresponding complexes are listed in the Table S31.

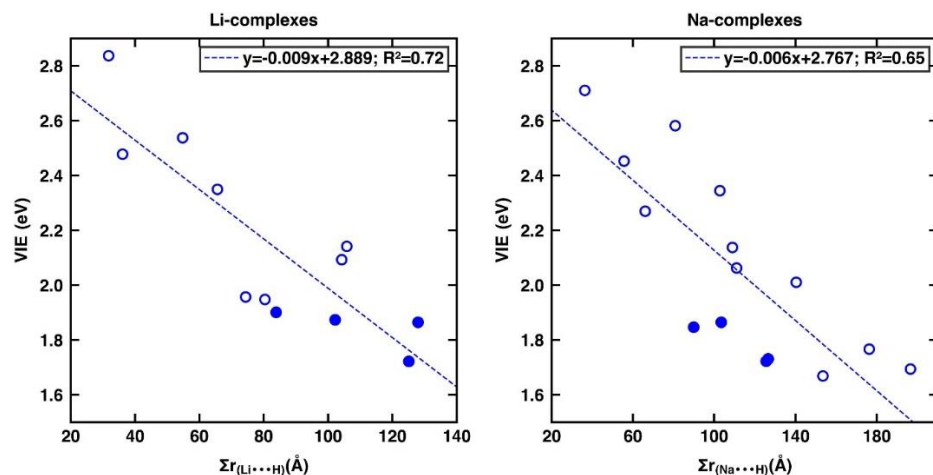

Figure S4. EPT VIE (eV) vs. the  $\Sigma r_{(M...H)}$  (Å) of Li- and Na-complexes. The open circles correspond to the literature values, whereas the closed circles represent the values report in the present work. The literature EPT VIEs and  $\Sigma r_{(M...H)}$  of corresponding complexes are listed in the Table S31.

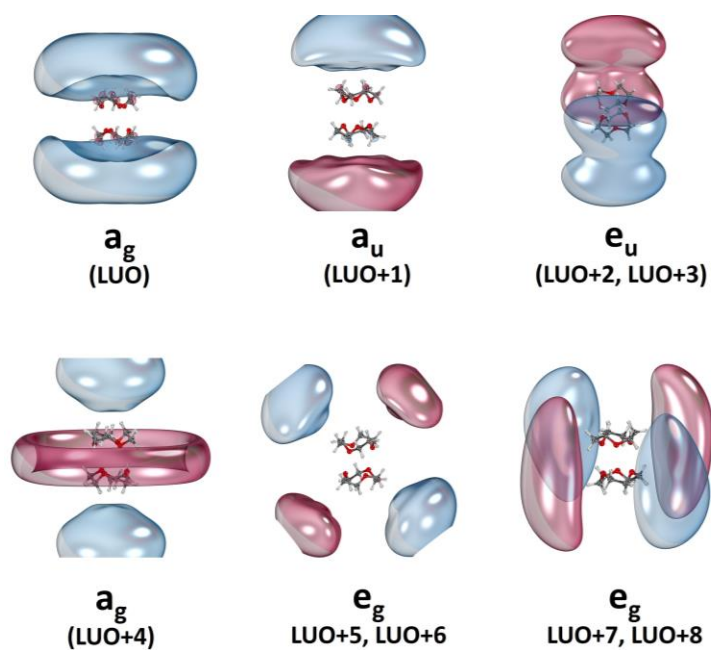

Figure S5. Lowest unoccupied orbitals (LUOs) of  $(9\text{-crown-}3)_2$  obtained under the geometry of  $\text{Li}(9\text{-crown-}3)_2$ . A threshold of 70% was applied for orbital plots.

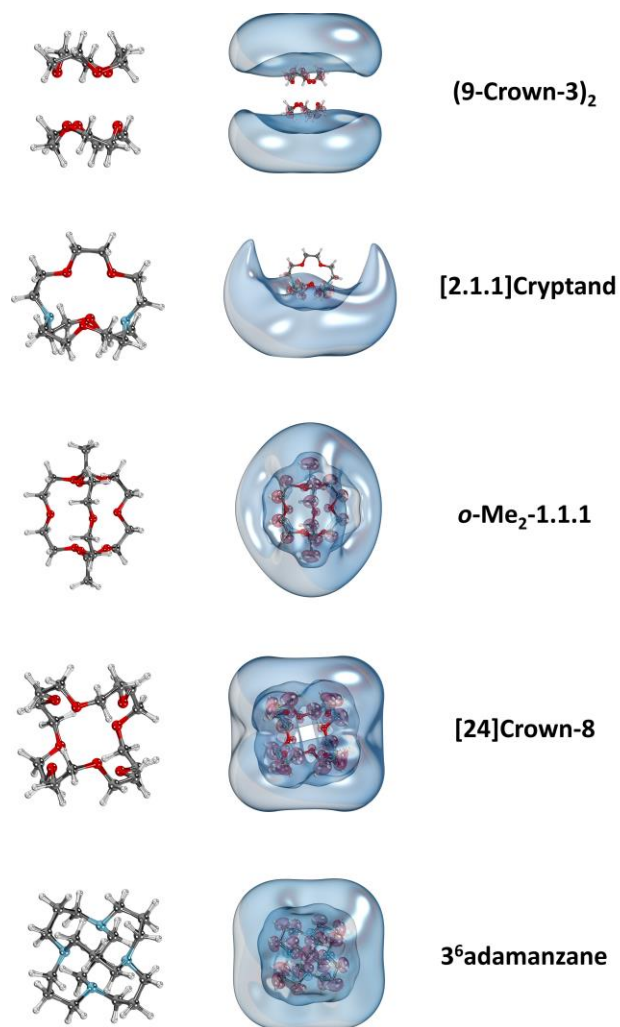

Figure S6. Lowest unoccupied orbitals (LUOs) of the (9-crown-3)<sub>2</sub>, [2.1.1]Cryptand, *o*-Me<sub>2</sub>-1.1.1, 24-Crown-8, and 3<sup>6</sup>adamanzane (blue color). The LUOs of (9-crown-3)<sub>2</sub>, [2.1.1]Cryptand, and 3<sup>6</sup>adamanzane obtained at geometries of their corresponding Li-complexes. The LUOs of *o*-Me<sub>2</sub>-1.1.1 and 24-Crown-8 obtained at the geometries of their corresponding Na-complexes. A threshold of 70% was applied for orbital plots.

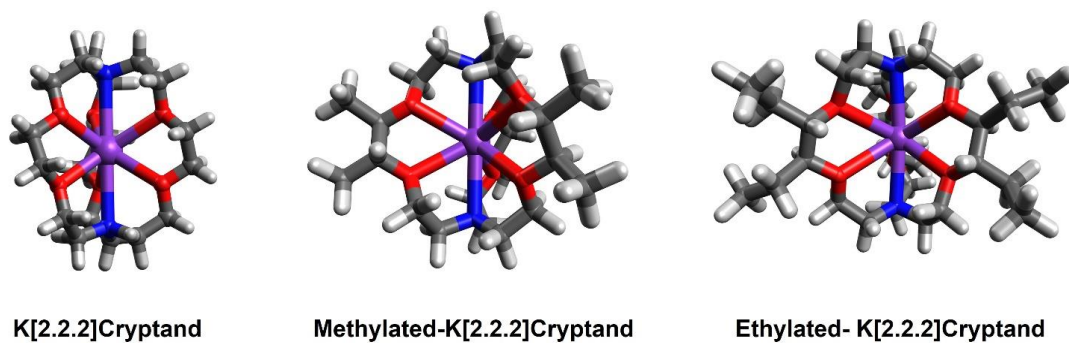

Figure S7. Geometries of K[2.2.2]Cryptand, Methylated-K[2.2.2]Cryptand, and Ethylated-K[2.2.2]Cryptand complexes.

## References

1. I. R. Ariyaratna, F. Pawlowski, J. V. Ortiz and E. Miliordos, *Phys Chem Chem Phys*, 2018, **20**, 24186-24191.
2. I. R. Ariyaratna, *International Journal of Quantum Chemistry*, 2021, **121**.
3. I. R. Ariyaratna and E. Miliordos, *Phys Chem Chem Phys*, 2021, **23**, 20298-20306.
4. I. R. Ariyaratna, *Inorg Chem*, 2022, **61**, 579-585.
5. I. R. Ariyaratna, *J Comput Chem*, 2024, **45**, 655-662.
